# Supplementary material for: Use of Alignment-Free Phylogenetics for Rapid Genome Sequence-Based Typing of Helicobacter pylori Virulence Markers and Antibiotic Susceptibility
Source: PubMed Central journal article supplement (PMC4540916; doi:10.1128/jcm.01357-15), 2015-08-18
Supplement: JCM.01357-15_zjm999094462so1.pdf [file JCM.01357-15_zjm999094462so1.pdf]

## SUPPLEMENTARY INFORMATION FOR

**Use of alignment-free phylogenetics for rapid genome sequence-based typing of *Helicobacter pylori* virulence markers and antibiotic susceptibility**Arnoud H. M. van Vliet <sup>a,\*</sup>, Johannes G. Kusters <sup>b</sup>Table of contents:

- **Figure S1.** Determination of optimal feature length for three *Helicobacter* species with varied G+C percentages.
- **Figure S2.** Effect of feature length selection on FFP whole genome (A) and FFP whole proteome (B) trees of the gastric *Helicobacter* species shown in Figure 1.
- **Figure S3.** *De novo* assembled *H. pylori* genomes branch with their published versions in FFP analysis.
- **Figure S4.** FFP-analysis of whole proteomes (A), and SNP-based genome clustering (B) for 90 South-African *H. pylori* isolates.
- **Figure S5.** Multi Locus Sequence Typing of *H. pylori* isolates used in this study.
- **Figure S6.** Untransformed trees in traditional (left) and radial (right) format of the (A) whole genome phylogenetic tree and (B) the whole proteome FFP tree used in Figures 4 and 5.
- **Figure S7.** Feature frequency profiling of whole genomes (top) and whole proteomes (bottom) matches phylogeographic-based molecular epidemiology of *H. pylori*.
- **Table S1.** Accession number, isolate designation, MLST-type (for *H. pylori*), and host from which the strain was isolated is indicated.
- **Table S2.** Overview of *H. pylori* genome sequences included in this study, with genotypes, MLST, geographic and disease outcome information.
- **Table S3.** Primers used for in silico PCR genotyping of *H. pylori* virulence markers.
- **Table S4.** Presence / absence analysis of genes belonging to the *H. pylori* *cag* pathogenicity island
- **Table S5.** Prediction of antibiotic resistance encoded in *H. pylori* genomes.
- **References Supplementary Information**

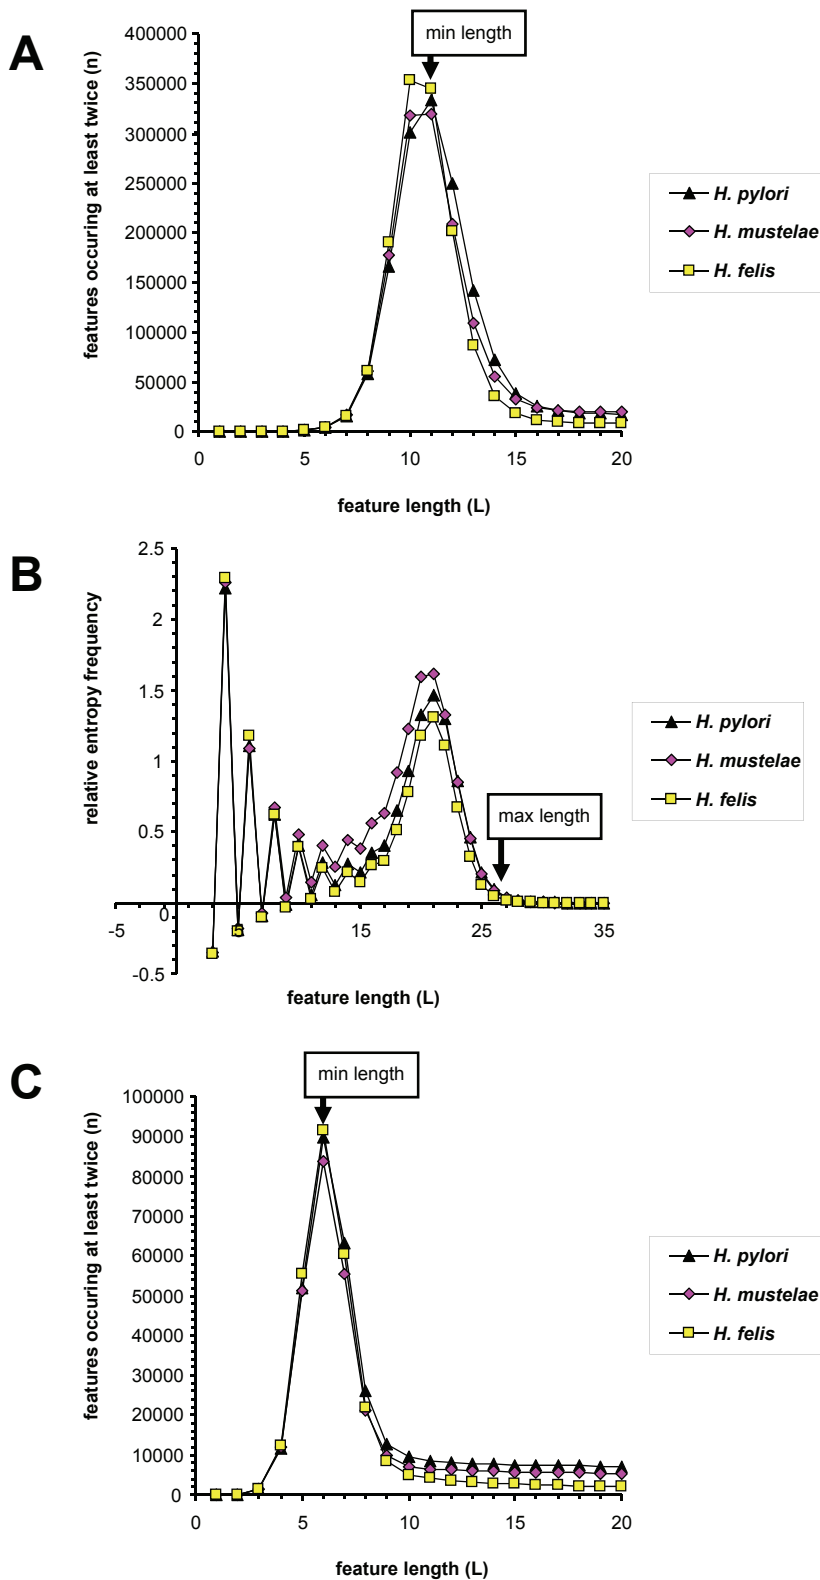

**Figure S1.** Determination of optimal feature length for three *Helicobacter* species with varied G+C percentages. Graphs A and C show the determination of the minimum feature length for DNA (A) and amino acid sequences (B) using the ffpvprof utility (1). Graph B shows the determination of the maximum feature length for DNA using the ffprefprof utility (1); we were unable to run this utility with amino acid sequences. The minimum feature length for DNA is 11 and the maximum length is 26, whereas the minimum feature length for amino acid sequences is 6. The genomes used are *H. pylori* 26695 (G+C=38.9%), *H. felis* ATCC 49179 (G+C= 44.5%) and *H. mustelae* NCTC 12198 (G+C=42.5%).

**A**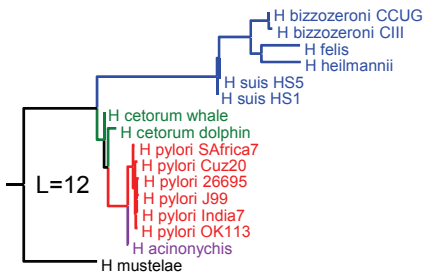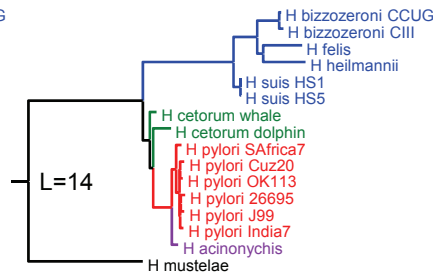**B**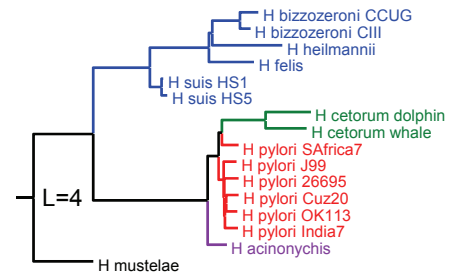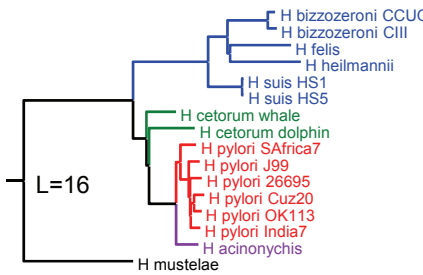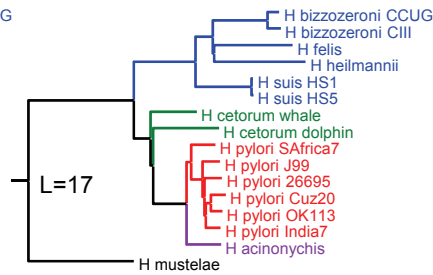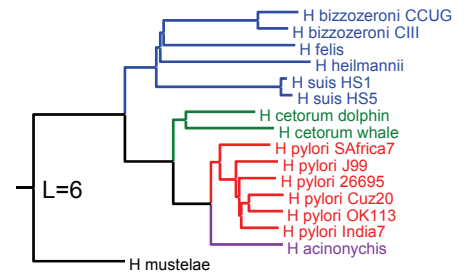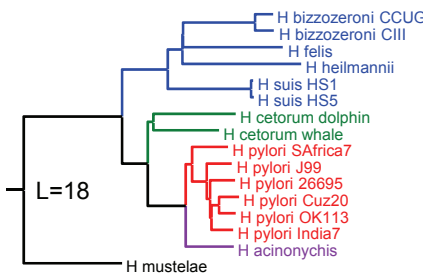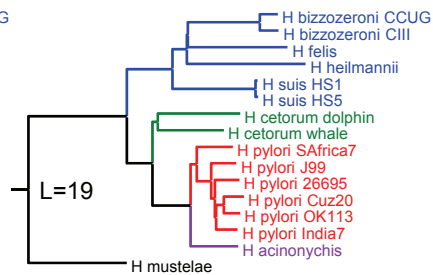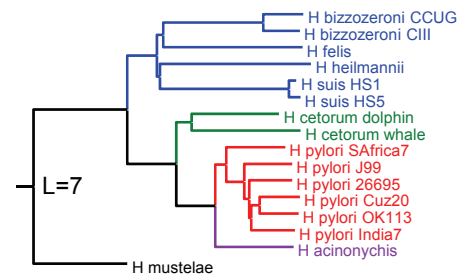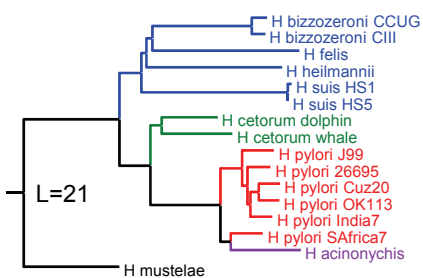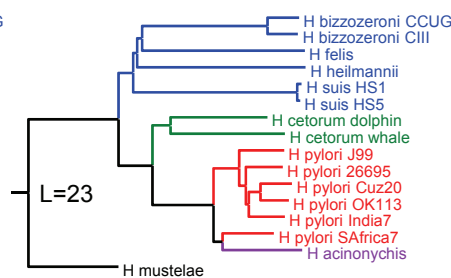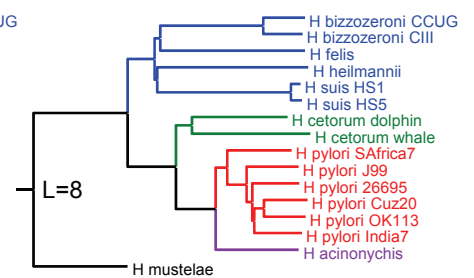

**Figure S2.** Effect of feature length selection on FFPr whole genome (A) and FFPr proteome (B) trees of the gastric *Helicobacter* species shown in Figure 1. *H. mustelae* was used as outgroup for tree rooting. Coloring of branches is identical to Figure 1. The feature length was varied between L=11 and L=23 for DNA (RY), and between L=4 and L=8 for amino acid sequences. For RY-based phylogenomic trees, increasing the feature length results in better resolution and longer branch lengths, but also computational time (not shown).

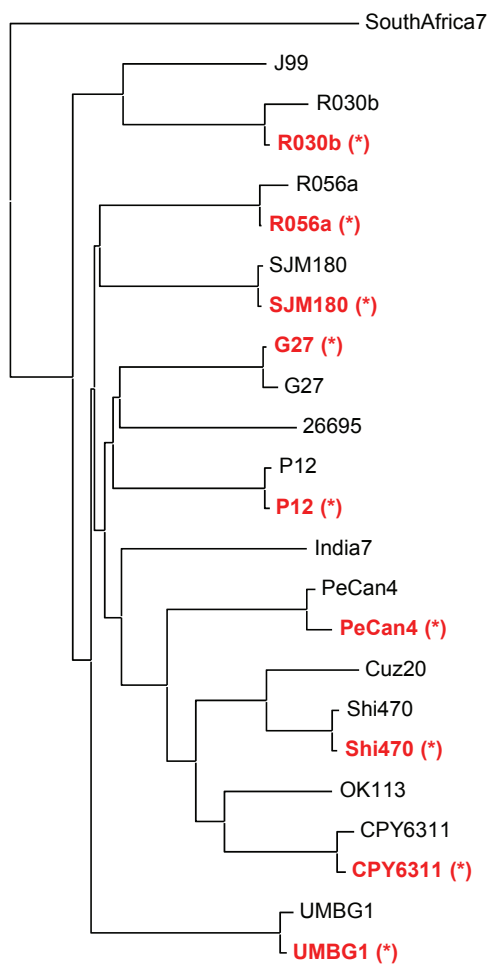

**Figure S3.** *De novo* assembled *H. pylori* genomes branch with their published versions in FFP analysis. Samples labelled red with an asterisk are genomes assembled *de novo* with the Velvet assembler (2) and used for FFPry analysis with L=18. Each of the newly assembled genomes branches clearly with the published version.

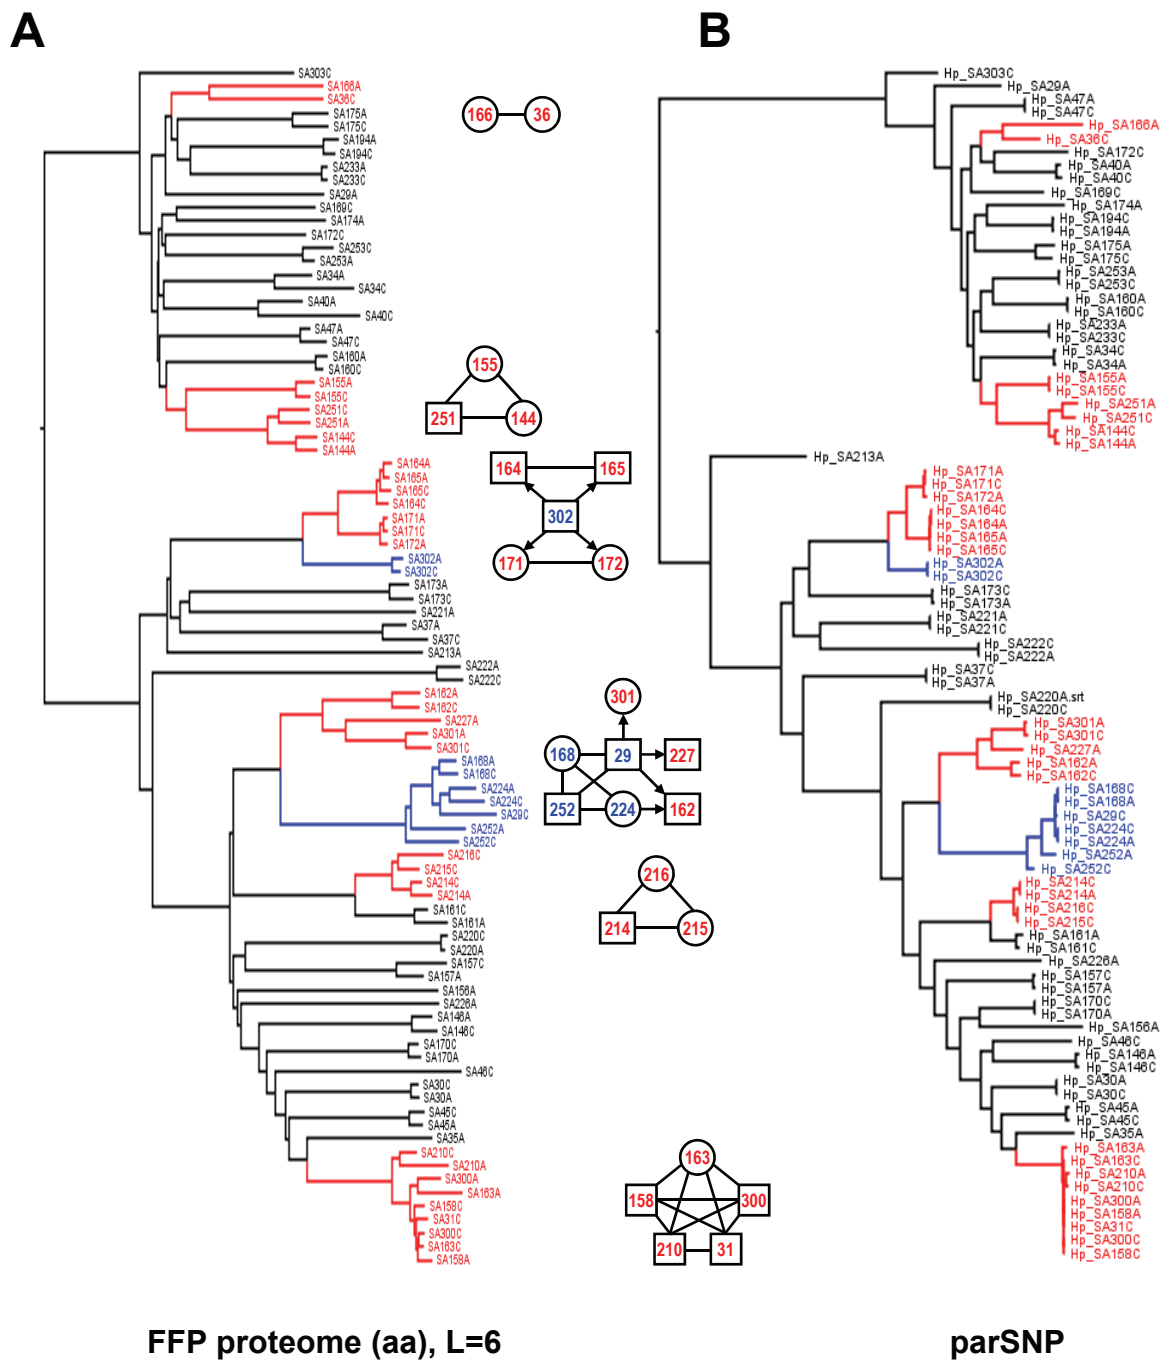

**Figure S4.** FFP-analysis of whole proteomes (A), and SNP-based genome clustering (B) for 90 South-African *H. pylori* isolates. The isolates are the ones shown in Figure 3 with whole genome FFP analysis (3). Squares and circles represent males and females, respectively, and the number used is the unique identifier number used in (3). Red-labeled isolates represent recipients and isolates for which the direction of recombination could not be deduced, blue-labeled isolates are donor isolates in the transmission indicated by the arrow. The FFP tree (A) was made using the amino acid sequences with L=6, the SNP-based tree (B) was created using parSNP.

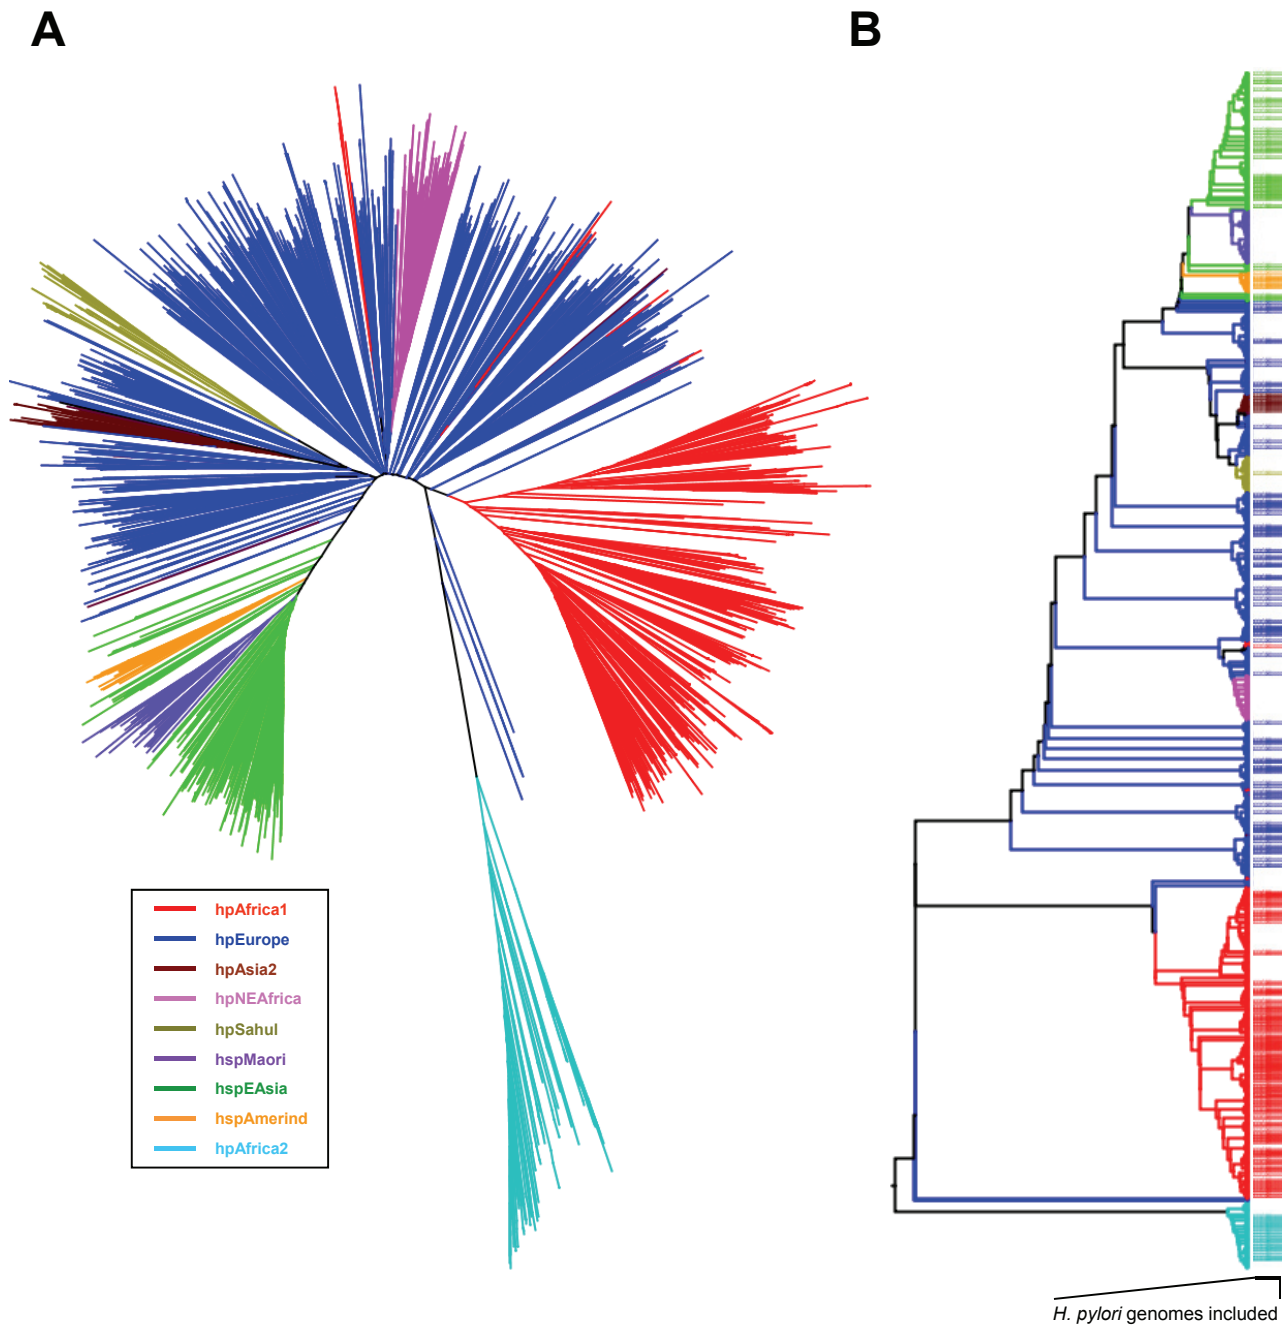

**Figure S5.** Multi Locus Sequence Typing of *H. pylori* isolates used in this study. (A) MLST using concatenated sequences of seven housekeeping genes (*atpA*, *efp*, *mutY*, *ppa*, *trpC*, *ureI*, *yphC*), aligned using the Muscle algorithm in MEGA 5.2 (4) and a Neighbor-Joining tree using the Kimura 2-parameter setting and pairwise deletion. The tree includes 1409 profiles from the PubMLST database (310 hpAfrica1, 67 hpAfrica2, 18 hpAsia2, 614 hpEurope, 21 hspAmerind, 183 hspEAsia, 80 hspMaori, 54 hpSahul and 62 hpNEAfrica) and MLST sequences from the 377 *H. pylori* genomes used in this study. (B) Tree showing the position of the MLST profiles of the 377 genomes included in this study, using the tree transformed with the proportional setting of FigTree 1.4.0.

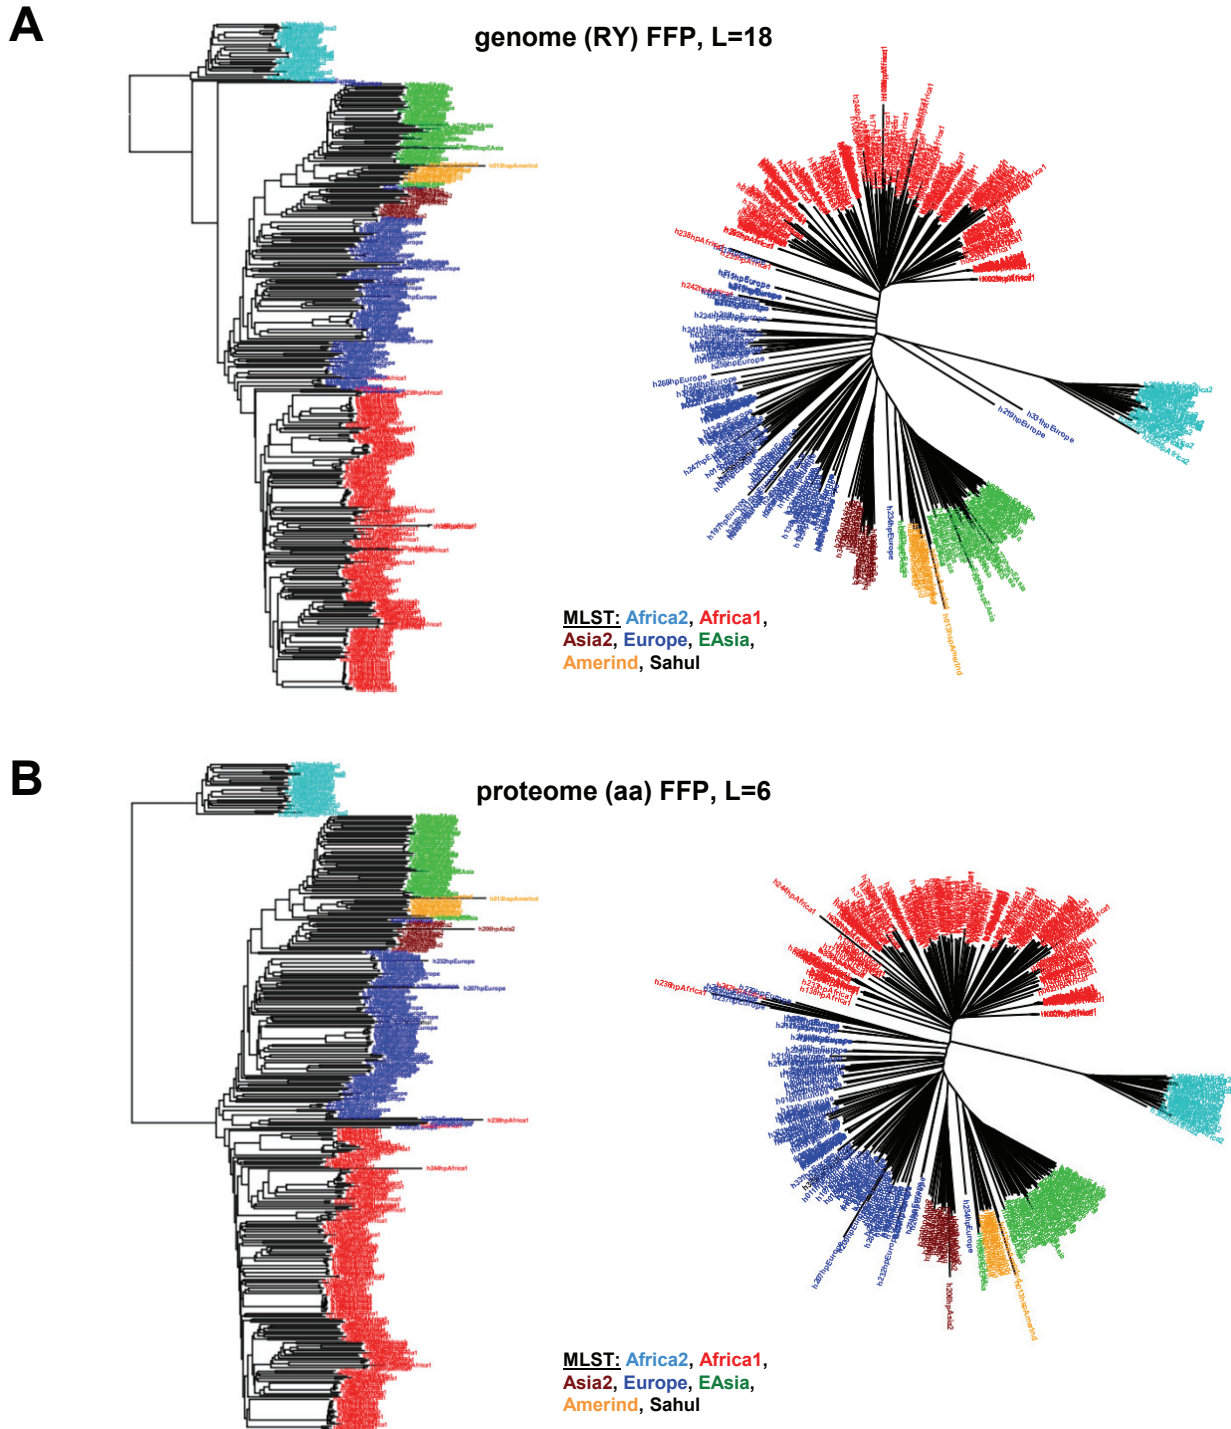

**Figure S6.** Untransformed trees in traditional (left) and radial (right) format of the (A) whole genome FFPry phylogenetic tree and (B) the whole proteome FFPaa tree used in Figures 4 and S7. The sample codes are colored according to the MLST-typing scheme. Trees are rooted using *H. acinonychis* strain Sheeba (Table S1) as outgroup.



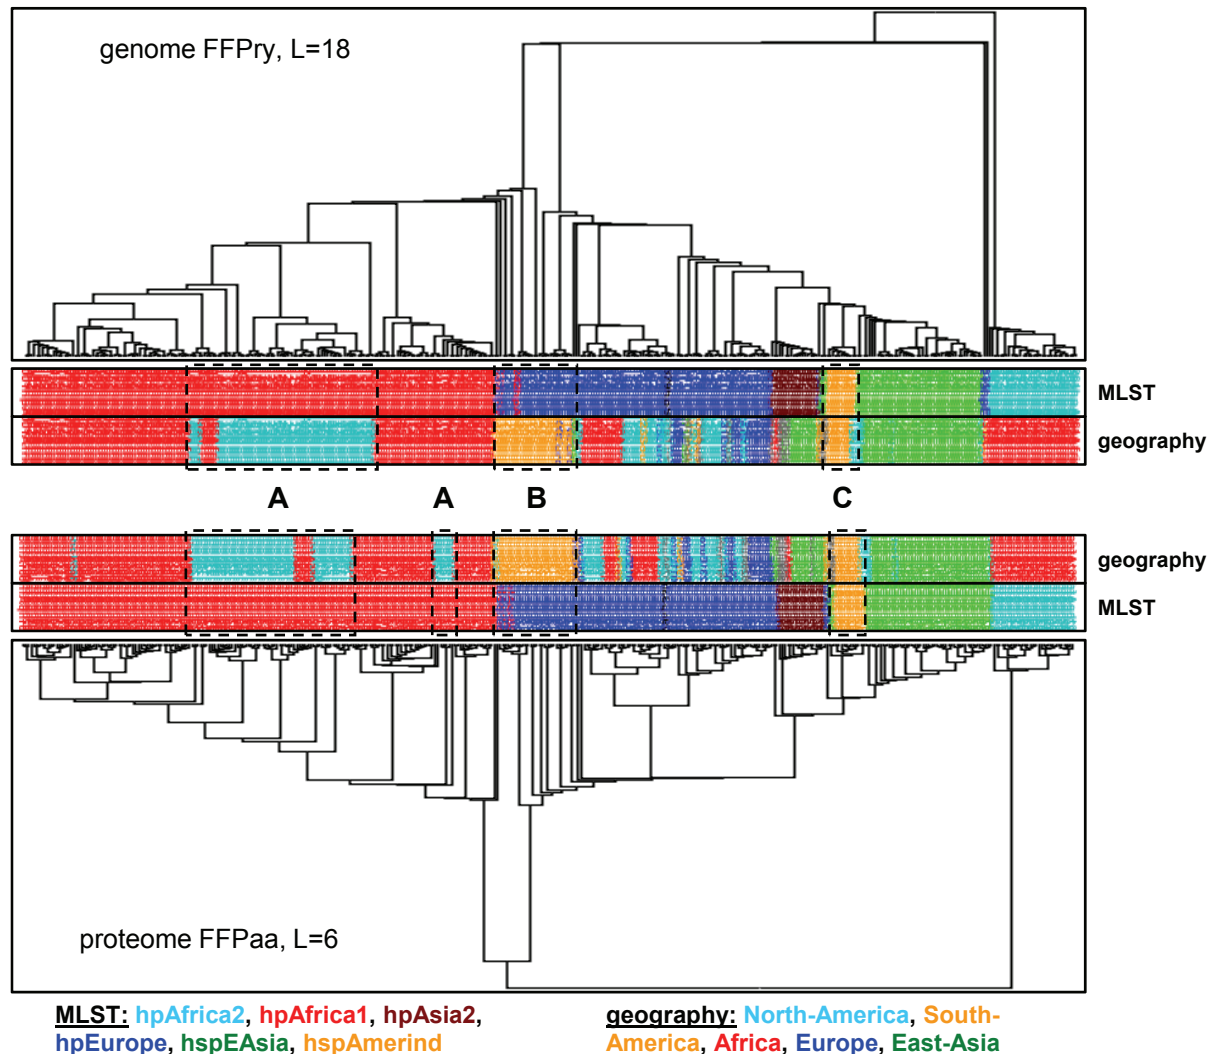

**Figure S7. Feature frequency profiling of whole genomes (top) and whole proteomes (bottom) matches phylogeographic-based molecular epidemiology of *H. pylori*.** A total of 377 *H. pylori* genome sequences and proteomes derived from annotated genome sequences (Table S2) were compared to MLST-derived genotypes and the (sub)continent where the strain was isolated. The trees have been transformed using the "proportional" setting of Figtree 1.4.0 for presentational purposes, the non-transformed trees with the original branch lengths are shown in Figure S6. The boxed areas show (A) a subgroup of hpAfrica1 strains isolated in North-America, probably representing migrations from the 17th century onwards ([5](#), [6](#)), and (B,C) the two separate clusters of *H. pylori* strains from South- and Middle-America (indicated as "South-America"), which represent the hspAmerind group from early human migration (C) and the hpEurope/hpAfrica1 strains from recent migrations (B). Trees are rooted using *H. acinonychis* Sheeba genome/proteome (Table S1) as outgroup.



**Table S1.** Overview of genome sequences of gastric *Helicobacter* species used for Figure 1.

| Species                | Strain       | Isolated from | Accession number | MLST-type  |
|------------------------|--------------|---------------|------------------|------------|
| <i>H. acinonychis</i>  | Sheeba       | lion          | NC_008229        | n/a        |
| <i>H. bizzozeronii</i> | CCUG 35545   | dog           | CAGP01           | n/a        |
| <i>H. bizzozeronii</i> | CIII-1       | human         | NC_015674        | n/a        |
| <i>H. cetorum</i>      | MIT 99-5656  | dolphin       | CP003481         | n/a        |
| <i>H. cetorum</i>      | MIT 00-7128  | whale         | CP003479         | n/a        |
| <i>H. felis</i>        | ATCC 49179   | cat           | NC_014810        | n/a        |
| <i>H. heilmannii</i>   | ASB1.4       | cat           | HE984298         | n/a        |
| <i>H. mustelae</i>     | 12198        | ferret        | NC_013949        | n/a        |
| <i>H. pylori</i>       | 26695        | human         | NC_000915        | hpEurope   |
| <i>H. pylori</i>       | Cuz20        | human         | CP002076         | hspAmerind |
| <i>H. pylori</i>       | India7       | human         | CP002331         | hpAsia2    |
| <i>H. pylori</i>       | J99          | human         | NC_000921        | hpAfrica1  |
| <i>H. pylori</i>       | OK113        | human         | AP012600         | hspEAsia   |
| <i>H. pylori</i>       | SouthAfrica7 | human         | CP002336         | hpAfrica2  |
| <i>H. suis</i>         | HS1          | pig           | ADGY01           | n/a        |
| <i>H. suis</i>         | HS5          | pig           | ADHO01           | n/a        |

**Table S2.** Overview of *H. pylori* genome sequences included in this study. Accession number, isolate designation, MLST-type, continent/subcontinent of isolation and virulence marker genotypes are indicated.

<sup>a</sup> Genome number labeled **blue** are included in Figure 2

<sup>b</sup> Continent/subcontinent where strain was isolated

<sup>c</sup> as determined by in silico PCR using MIST, with primers listed in Table S3

<sup>d</sup> PZ1/PZ2 positivity based on jhp0945/0947/0949-positivity for PZ1 and jhp0940-positivity for PZ2

| Isolate      | number <sup>a</sup> | Accession number | geography <sup>b</sup> | MLST       | disease / species | cag PAI <sup>c</sup> | vacA s-m <sup>c</sup> | vacA i-d <sup>c</sup> | babA2 <sup>c</sup> | dupA <sup>c</sup> | jhp917-918 <sup>c</sup> | iceA1-A2 <sup>c</sup> | PZ1/PZ2 <sup>c,d</sup> |
|--------------|---------------------|------------------|------------------------|------------|-------------------|----------------------|-----------------------|-----------------------|--------------------|-------------------|-------------------------|-----------------------|------------------------|
| 2017         | <b>h001</b>         | CP002571         | Africa                 | hpAfrica1  | unknown           | cag+                 | s1-m1                 | i1-d1                 | babA2+             | short             | 917+918                 | only iceA2            | neither                |
| 2018         | <b>h002</b>         | CP002572         | Africa                 | hpAfrica1  | unknown           | cag+                 | s1-m1                 | i1-d1                 | babA2+             | short             | 917+918                 | only iceA2            | neither                |
| 26695        | <b>h003</b>         | CP002096         | Europe                 | hpEurope   | gastritis         | cag+                 | s1-m1                 | i1-d1                 | no babA2           | absent            | neither                 | iceA1 only            | PZ2 only               |
| 35A          | <b>h004</b>         | CP002096         | North America          | hspEAsia   | unknown           | cag+                 | s1-m1                 | i1-d1                 | babA2+             | absent            | neither                 | only iceA2            | neither                |
| 51           | <b>h005</b>         | CP000012         | East Asia              | hspEAsia   | peptic ulcer      | cag+                 | s1-m1                 | i1-d1                 | babA2+             | long              | neither                 | iceA1 only            | neither                |
| 52           | <b>h006</b>         | CP001680         | East Asia              | hspEAsia   | unknown           | cag+                 | s1-m1                 | i1-d1                 | babA2+             | absent            | neither                 | iceA1 only            | neither                |
| 83           | <b>h007</b>         | CP002605         | North America          | hspEAsia   | unknown           | cag+                 | s1-m1                 | i1-d1                 | babA2+             | long              | neither                 | iceA1 only            | PZ1+PZ2                |
| 8A3          | <b>h008</b>         | CADD01           | North America          | hspEAsia   | unknown           | cag-neg              | s1-m1                 | i1-d1                 | babA2+             | absent            | neither                 | iceA1+A2              | PZ1 only               |
| 908          | <b>h009</b>         | CP002184         | Africa                 | hpAfrica1  | unknown           | cag+                 | s1-?                  | i1-d1                 | babA2+             | short             | 917+918                 | only iceA2            | neither                |
| 98-10        | h010                | ABSX01           | East Asia              | hspEAsia   | gastric cancer    | cag+                 | s1-m1                 | i1-d1                 | babA2+             | long              | only 918                | iceA1 only            | neither                |
| A45          | h011                | AMYU01           | Europe                 | hpEurope   | peptic ulcer      | cag-neg              | s2-m2                 | i2-d2                 | no babA2           | long              | 917+918                 | only iceA2            | neither                |
| Aklavik117   | <b>h012</b>         | CP003483         | North America          | hspAmerInd | gastritis         | cag-neg              | s2-m2                 | i2-d2                 | babA2+             | long              | 917+918                 | iceA1 only            | neither                |
| Aklavik86    | <b>h013</b>         | CP003476         | North America          | hspAmerInd | gastritis         | cag-neg              | s1-m1                 | i1-d2                 | no babA2           | absent            | neither                 | only iceA2            | neither                |
| B128         | h014                | ABSY01           | Europe                 | hpEurope   | peptic ulcer      | cag+                 | s1-m2                 | i1-d2                 | no babA2           | absent            | neither                 | iceA1 only            | PZ1+PZ2                |
| B38          | <b>h015</b>         | NC_012973        | Europe                 | hpEurope   | peptic ulcer      | cag-neg              | s2-m2                 | i2-d2                 | babA2+             | absent            | neither                 | iceA1 only            | PZ1 only               |
| B45          | h016                | AFAO01           | Europe                 | hpEurope   | unknown           | cag+                 | s1-m1                 | i2-d2                 | no babA2           | absent            | only 918                | iceA1 only            | PZ1 only               |
| B8           | <b>h017</b>         | NC_014256        | Europe                 | hpEurope   | peptic ulcer      | cag+                 | s1-m2                 | i1-d2                 | babA2+             | absent            | neither                 | iceA1 only            | PZ1+PZ2                |
| BCS100H1     | h018                | CADC01           | North America          | hspEAsia   | unknown           | cag-neg              | s1-m1                 | i1-d1                 | babA2+             | absent            | neither                 | iceA1+A2              | PZ1 only               |
| BM012A       | <b>h019</b>         | CP006888         | (Other) Australia      | hpEurope   | unknown           | cag+                 | s1-?                  | i2-d2                 | babA2+             | absent            | neither                 | iceA1 only            | PZ1+PZ2                |
| BM012S       | <b>h020</b>         | CP006889         | (Other) Australia      | hpEurope   | unknown           | cag+                 | s1-?                  | i2-d2                 | babA2+             | absent            | neither                 | iceA1 only            | PZ1+PZ2                |
| CCHI_33      | <b>h021</b>         | AOTU01           | North America          | hpAfrica1  | unknown           | cag+                 | s1-m1                 | i1-d1                 | babA2+             | short             | 917+918                 | only iceA2            | PZ1 only               |
| CG-IMSS-2012 | h022                | AWUL01           | South America          | hpEurope   | gastric cancer    | cag+                 | s1-m1                 | i1-d1                 | babA2+             | absent            | only 918                | iceA1+A2              | PZ1+PZ2                |
| CPY1124      | h023                | AKNJ01           | East Asia              | hspEAsia   | peptic ulcer      | cag+                 | s1-m1                 | i1-d1                 | babA2+             | absent            | only 918                | iceA1+A2              | neither                |
| CPY1313      | h024                | AKNK01           | East Asia              | hspEAsia   | peptic ulcer      | cag+                 | s1-m1                 | i1-d1                 | babA2+             | absent            | only 918                | iceA1 only            | PZ1+PZ2                |
| CPY1662      | h025                | AOTT01           | East Asia              | hspEAsia   | unknown           | cag+                 | s1-m2                 | i1-d1                 | babA2+             | absent            | only 918                | iceA1 only            | PZ1 only               |
| CPY1962      | h026                | AKNL01           | East Asia              | hspEAsia   | peptic ulcer      | cag+                 | s1-m1                 | i1-d1                 | babA2+             | short             | neither                 | iceA1 only            | PZ2 only               |
| CPY3281      | h027                | AKNM01           | East Asia              | hspEAsia   | peptic ulcer      | cag+                 | s1-m1                 | i1-d1                 | babA2+             | long              | 917+918                 | iceA1+A2              | PZ1 only               |
| CPY6081      | h028                | AKNN01           | East Asia              | hspEAsia   | gastric cancer    | cag+                 | s1-m1                 | i1-d1                 | babA2+             | long              | 917+918                 | iceA1+A2              | PZ1 only               |
| CPY6261      | h029                | AKNO01           | East Asia              | hspEAsia   | gastric cancer    | cag+                 | s1-m1                 | i1-d1                 | babA2+             | long              | neither                 | iceA1 only            | PZ1+PZ2                |
| CPY6271      | h030                | AKNP01           | East Asia              | hspEAsia   | gastric cancer    | cag+                 | s1-m1                 | i1-d1                 | babA2+             | long              | 917+918                 | iceA1+A2              | PZ1 only               |
| CPY6311      | h031                | AKNQ01           | East Asia              | hspEAsia   | gastric cancer    | cag+                 | s1-m1                 | i1-d1                 | babA2+             | absent            | neither                 | iceA1+A2              | neither                |
| Cuz20        | <b>h032</b>         | CP002076         | South America          | hspAmerInd | unknown           | cag+                 | s1-m1                 | i2-d2                 | babA2+             | long              | 917+918                 | only iceA2            | neither                |
| E48          | h033                | AYHQ01           | (Other) Russia         | hspEAsia   | gastritis         | cag+                 | s1-m1                 | i1-d1                 | babA2+             | long              | 917+918                 | iceA1 only            | neither                |
| ELS37        | <b>h034</b>         | CP002953         | South America          | hpEurope   | gastric cancer    | cag+                 | s1-m1                 | i1-d1                 | babA2+             | absent            | neither                 | iceA1 only            | PZ2 only               |
| F16          | <b>h035</b>         | AP011940         | East Asia              | hspEAsia   | unknown           | cag+                 | s1-m1                 | i1-d1                 | babA2+             | absent            | neither                 | iceA1 only            | neither                |
| F30          | <b>h036</b>         | AP011941         | East Asia              | hspEAsia   | unknown           | cag+                 | s1-m1                 | i1-d1                 | babA2+             | long              | neither                 | iceA1 only            | neither                |
| F32          | <b>h037</b>         | AP011943         | East Asia              | hspEAsia   | unknown           | cag+                 | s1-m1                 | i1-d1                 | babA2+             | absent            | neither                 | iceA1 only            | PZ2 only               |
| F57          | <b>h038</b>         | AP011945         | East Asia              | hspEAsia   | unknown           | cag+                 | s1-m1                 | i1-d1                 | babA2+             | long              | 917+918                 | iceA1 only            | PZ1 only               |
| FD423        | <b>h039</b>         | AKHM02           | East Asia              | hpAsia2    | dyspepsia         | cag+                 | s1-?                  | i1-d1                 | babA2+             | long              | neither                 | iceA1 only            | PZ1 only               |
| FD430        | h040                | AKHN02           | East Asia              | hpAsia2    | dyspepsia         | cag+                 | ?-m1                  | i1-d1                 | babA2+             | absent            | neither                 | iceA1+A2              | PZ1 only               |
| FD506        | h041                | AKHO02           | East Asia              | hspEAsia   | dyspepsia         | cag+                 | ?-?                   | i1-d1                 | babA2+             | short             | only 918                | iceA1 only            | PZ1+PZ2                |
| FD535        | h042                | AKHP02           | East Asia              | hpAsia2    | dyspepsia         | cag+                 | s1-m1                 | i1-d1                 | babA2+             | long              | 917+918                 | iceA1 only            | PZ1 only               |
| FD568        | h043                | AKHQ02           | East Asia              | hspEAsia   | dyspepsia         | cag+                 | ?-m1                  | i1-d1                 | no babA2           | long              | 917+918                 | iceA1 only            | PZ1 only               |
| FD577        | h044                | AKHR02           | East Asia              | hspEAsia   | dyspepsia         | cag+                 | s1-m1                 | i1-d1                 | babA2+             | short             | only 918                | iceA1 only            | PZ1+PZ2                |

|              |             |           |           |           |                |         |       |       |          |        |          |            |          |
|--------------|-------------|-----------|-----------|-----------|----------------|---------|-------|-------|----------|--------|----------|------------|----------|
| FD662        | h045        | AKHT02    | East Asia | hpAsia2   | dyspepsia      | cag+    | ?-m1  | i1-d1 | babA2+   | absent | neither  | only iceA2 | PZ2 only |
| FD703        | h046        | AKHS02    | East Asia | hpAsia2   | dyspepsia      | cag+    | ?-m1  | i1-d1 | babA2+   | absent | neither  | iceA1 only | PZ1+PZ2  |
| FD719        | h047        | AKHU02    | East Asia | hpAsia2   | dyspepsia      | cag+    | ?-m1  | i1-d1 | babA2+   | absent | neither  | iceA1+A2   | PZ1 only |
| G27          | <b>h048</b> | NC_011333 | Europe    | hpEurope  | unknown        | cag+    | s1-m1 | i1-d1 | babA2+   | long   | 917+918  | only iceA2 | neither  |
| GAM100Ai     | h049        | ANFP01    | Africa    | hpAfrica1 | unknown        | cag+    | s1-m1 | i1-d1 | babA2+   | short  | 917+918  | neither    | PZ1+PZ2  |
| GAM101Biv    | h050        | APCW01    | Africa    | hpAfrica1 | unknown        | cag-neg | s2-m2 | i2-d2 | no babA2 | long   | 917+918  | iceA1+A2   | PZ2 only |
| GAM103Bi     | <b>h051</b> | APCX01    | Africa    | hpAfrica1 | unknown        | cag+    | s1-m1 | i1-d1 | babA2+   | short  | 917+918  | iceA1+A2   | PZ1 only |
| GAM105Ai     | h052        | APCY01    | Africa    | hpAfrica1 | unknown        | cag+    | s1-m1 | i1-d1 | babA2+   | absent | neither  | only iceA2 | PZ2 only |
| GAM112Ai     | h053        | APCZ01    | Africa    | hpAfrica1 | unknown        | cag+    | s1-m1 | i1-d1 | babA2+   | long   | 917+918  | only iceA2 | PZ1 only |
| GAM114Ai     | h054        | APDA01    | Africa    | hpAfrica1 | unknown        | cag+    | s1-m1 | i1-d1 | babA2+   | absent | only 918 | only iceA2 | PZ2 only |
| GAM115Ai     | h055        | APDB01    | Africa    | hpAfrica1 | unknown        | cag+    | s1-m2 | i1-d1 | no babA2 | short  | 917+918  | only iceA2 | PZ1+PZ2  |
| GAM117Ai     | h056        | AWER01    | Africa    | hpAfrica1 | unknown        | cag+    | s1-m1 | i1-d1 | babA2+   | short  | 917 only | only iceA2 | PZ2 only |
| GAM118Bi     | h057        | APDD01    | Africa    | hpAfrica1 | unknown        | cag+    | s1-m2 | i2-d1 | babA2+   | long   | 917+918  | only iceA2 | PZ1+PZ2  |
| GAM119Bi     | h058        | APDE01    | Africa    | hpAfrica1 | unknown        | cag+    | s1-m1 | i1-d1 | babA2+   | short  | 917+918  | iceA1 only | PZ1+PZ2  |
| GAM120Ai     | h059        | APDF01    | Africa    | hpAfrica1 | unknown        | cag+    | s1-m1 | i1-d1 | babA2+   | short  | 917+918  | only iceA2 | PZ1+PZ2  |
| GAM121Aii    | h060        | APDG01    | Africa    | hpAfrica1 | unknown        | cag+    | s1-m1 | i1-d1 | babA2+   | short  | 917+918  | only iceA2 | PZ1+PZ2  |
| GAM201Ai     | h061        | APDC01    | Africa    | hpAfrica1 | unknown        | cag-neg | s2-m2 | i2-d2 | no babA2 | long   | 917+918  | iceA1+A2   | neither  |
| GAM210Bi     | h062        | APDH01    | Africa    | hpAfrica1 | unknown        | cag+    | s1-m1 | i1-d1 | babA2+   | short  | 917+918  | iceA1+A2   | PZ1 only |
| GAM231Ai     | h063        | APDI01    | Africa    | hpAfrica1 | unknown        | cag-neg | s2-m2 | i2-d2 | no babA2 | long   | 917+918  | iceA1 only | PZ1+PZ2  |
| GAM239Bi     | h064        | APDJ01    | Africa    | hpAfrica1 | unknown        | cag-neg | s2-m2 | i2-d2 | no babA2 | short  | 917+918  | iceA1 only | PZ2 only |
| GAM244Ai     | h065        | APDK01    | Africa    | hpAfrica1 | unknown        | cag-neg | s2-m2 | i2-d2 | no babA2 | absent | only 918 | only iceA2 | PZ1+PZ2  |
| GAM245Ai     | h066        | APDL01    | Africa    | hpAfrica1 | unknown        | cag+    | ?-m1  | i1-d1 | babA2+   | absent | neither  | only iceA2 | PZ1+PZ2  |
| GAM246Ai     | h067        | APDM01    | Africa    | hpAfrica1 | unknown        | cag+    | s1-m1 | i1-d1 | babA2+   | short  | 917+918  | only iceA2 | PZ1+PZ2  |
| GAM249T      | h068        | APDN01    | Africa    | hpAfrica1 | unknown        | cag+    | s1-m1 | i1-d1 | babA2+   | short  | 917+918  | only iceA2 | PZ1 only |
| GAM250AFi    | h069        | APDO01    | Africa    | hpAfrica1 | unknown        | cag+    | s1-m1 | i1-d1 | babA2+   | absent | only 918 | iceA1+A2   | neither  |
| GAM250T      | h070        | APDP01    | Africa    | hpAfrica1 | unknown        | cag+    | s1-m1 | i1-d1 | no babA2 | absent | only 918 | iceA1+A2   | neither  |
| GAM252Bi     | h071        | APDQ01    | Africa    | hpAfrica1 | unknown        | cag+    | s1-m1 | i1-d1 | babA2+   | absent | only 918 | iceA1+A2   | neither  |
| GAM252T      | h072        | APDR01    | Africa    | hpAfrica1 | unknown        | cag+    | s1-m1 | i1-d1 | babA2+   | absent | only 918 | iceA1+A2   | neither  |
| GAM254Ai     | h073        | APDS01    | Africa    | hpAfrica1 | unknown        | cag+    | s1-m2 | i2-d2 | babA2+   | long   | 917+918  | only iceA2 | PZ1 only |
| GAM260ASi    | h074        | APDT01    | Africa    | hpAfrica1 | unknown        | cag+    | s1-m1 | i1-d1 | babA2+   | short  | 917+918  | iceA1 only | PZ1 only |
| GAM260Bi     | h075        | APDU01    | Africa    | hpAfrica1 | unknown        | cag+    | s1-m1 | i1-d1 | babA2+   | short  | 917+918  | only iceA2 | PZ1+PZ2  |
| GAM260BSi    | <b>h076</b> | APDV01    | Africa    | hpAfrica1 | unknown        | cag-neg | s2-m2 | i2-d2 | no babA2 | long   | 917+918  | iceA1+A2   | neither  |
| GAM263BFi    | h077        | APDW01    | Africa    | hpAfrica1 | unknown        | cag+    | s1-m1 | i1-d1 | babA2+   | long   | 917+918  | only iceA2 | PZ1+PZ2  |
| GAM264Ai     | h078        | APDX01    | Africa    | hpAfrica1 | unknown        | cag-neg | s2-m2 | i2-d2 | no babA2 | absent | only 918 | iceA1+A2   | PZ1+PZ2  |
| GAM265BSii   | h079        | APDY01    | Africa    | hpAfrica1 | unknown        | cag+    | s1-m2 | i2-d1 | no babA2 | short  | 917+918  | iceA1 only | PZ1 only |
| GAM268Bii    | h080        | APDZ01    | Africa    | hpAfrica1 | unknown        | cag+    | s1-m1 | i1-d1 | babA2+   | short  | 917+918  | iceA1 only | PZ1 only |
| GAM270ASi    | h081        | APEA01    | Africa    | hpAfrica1 | unknown        | cag+    | s1-m1 | i1-d1 | babA2+   | absent | neither  | only iceA2 | PZ1+PZ2  |
| GAM42Ai      | h082        | APEB01    | Africa    | hpAfrica1 | unknown        | cag+    | s1-m1 | i1-d1 | no babA2 | long   | 917+918  | only iceA2 | PZ1 only |
| GAM71Ai      | h083        | APEC01    | Africa    | hpAfrica1 | unknown        | cag-neg | s2-m2 | i2-d2 | babA2+   | long   | 917+918  | iceA1+A2   | PZ2 only |
| GAM80Ai      | h084        | APED01    | Africa    | hpAfrica1 | unknown        | cag+    | s1-m1 | i1-d1 | babA2+   | absent | neither  | only iceA2 | PZ1 only |
| GAM83Bi      | h085        | APEE01    | Africa    | hpAfrica1 | unknown        | cag-neg | s2-m2 | i2-d2 | babA2+   | long   | 917+918  | iceA1+A2   | PZ1 only |
| GAM83T       | h086        | APEF01    | Africa    | hpAfrica1 | unknown        | cag-neg | s2-m2 | i2-d2 | babA2+   | long   | 917+918  | iceA1+A2   | PZ1 only |
| GAM93Bi      | h087        | APEG01    | Africa    | hpAfrica1 | unknown        | cag+    | s1-m1 | i1-d1 | no babA2 | short  | 917+918  | iceA1+A2   | PZ1 only |
| GAM96Ai      | h088        | APEH01    | Africa    | hpAfrica1 | unknown        | cag+    | ?-m2  | i2-d2 | babA2+   | absent | neither  | only iceA2 | neither  |
| Gambia9424   | <b>h089</b> | CP002332  | Africa    | hpAfrica1 | unknown        | cag+    | s1-m1 | i1-d1 | babA2+   | short  | 917+918  | only iceA2 | PZ1+PZ2  |
| GAMchJs106B  | h090        | APEI01    | Africa    | hpAfrica1 | unknown        | cag-neg | s2-m2 | i2-d2 | babA2+   | absent | only 918 | iceA1 only | PZ1+PZ2  |
| GAMchJs114i  | h091        | APEJ01    | Africa    | hpAfrica1 | unknown        | cag-neg | s2-m2 | i2-d2 | no babA2 | absent | only 918 | only iceA2 | PZ1+PZ2  |
| GAMchJs117Ai | h092        | APEK01    | Africa    | hpAfrica1 | unknown        | cag-neg | s2-m2 | i2-d2 | babA2+   | long   | 917+918  | iceA1 only | PZ1+PZ2  |
| GAMchJs124i  | h093        | APEL01    | Africa    | hpAfrica1 | unknown        | cag-neg | s2-m2 | i2-d2 | no babA2 | long   | 917+918  | iceA1 only | PZ1+PZ2  |
| GAMchJs136i  | h094        | APEM01    | Africa    | hpAfrica1 | unknown        | cag+    | s1-m1 | i1-d1 | babA2+   | short  | 917+918  | only iceA2 | PZ1+PZ2  |
| GC26         | h095        | AKHV02    | East Asia | hspEAsia  | gastric cancer | cag+    | s1-m1 | i1-d1 | no babA2 | long   | 917+918  | iceA1 only | PZ1 only |

|          |      |        |                |           |              |         |       |       |          |        |          |            |          |
|----------|------|--------|----------------|-----------|--------------|---------|-------|-------|----------|--------|----------|------------|----------|
| H13-1    | h096 | AYUH01 | (Other) Russia | hspEAsia  | gastritis    | cag+    | s1-m1 | i1-d1 | babA2+   | absent | only 918 | only iceA2 | PZ1+PZ2  |
| HLJHP193 | h097 | ALJI01 | East Asia      | hspEAsia  | peptic ulcer | cag+    | s1-m1 | i1-d1 | babA2+   | long   | only 918 | iceA1 only | PZ1 only |
| HLJHP253 | h098 | ALKC01 | East Asia      | hspEAsia  | peptic ulcer | cag+    | s1-m2 | i1-d1 | babA2+   | short  | neither  | iceA1 only | neither  |
| HLJHP256 | h099 | ALKA01 | East Asia      | hspEAsia  | peptic ulcer | cag+    | s1-m2 | i1-d1 | babA2+   | short  | neither  | iceA1 only | neither  |
| HLJHP271 | h100 | ALKB01 | East Asia      | hspEAsia  | peptic ulcer | cag+    | s1-m2 | i1-d1 | babA2+   | short  | neither  | iceA1 only | neither  |
| Hp_A-11  | h101 | AOTW01 | North America  | hpEurope  | peptic ulcer | cag+    | s1-m2 | i1-d1 | babA2+   | long   | 917+918  | iceA1 only | PZ1+PZ2  |
| Hp_A-14  | h102 | AKOT01 | North America  | hpEurope  | gastritis    | cag-neg | s2-m2 | i2-d2 | babA2+   | absent | only 918 | iceA1 only | PZ1 only |
| Hp_A-16  | h103 | AKOU01 | North America  | hpAfrica1 | gastritis    | cag+    | s1-m1 | i1-d1 | babA2+   | short  | 917+918  | only iceA2 | PZ1 only |
| Hp_A-17  | h104 | AKOD01 | North America  | hpAfrica1 | peptic ulcer | cag-neg | s1-m1 | i1-d1 | babA2+   | short  | 917+918  | only iceA2 | PZ1+PZ2  |
| Hp_A-20  | h105 | AKOE01 | North America  | hpAfrica1 | peptic ulcer | cag+    | s1-m1 | i1-d1 | babA2+   | short  | 917+918  | iceA1 only | PZ1 only |
| Hp_A-26  | h106 | AKOV01 | North America  | hpEurope  | gastritis    | cag-neg | s2-m2 | i2-d2 | no babA2 | absent | neither  | iceA1 only | PZ1+PZ2  |
| Hp_A-27  | h107 | AKOW01 | North America  | hpEurope  | gastritis    | cag+    | s1-m2 | i1-d? | babA2+   | long   | 917+918  | iceA1 only | PZ1+PZ2  |
| Hp_A-4   | h108 | AKOA01 | North America  | hpAfrica1 | peptic ulcer | cag+    | s1-m2 | i1-d1 | babA2+   | short  | 917+918  | iceA1 only | neither  |
| Hp_A-5   | h109 | AKOB01 | North America  | hpAfrica1 | peptic ulcer | cag+    | s1-m1 | i1-d1 | babA2+   | long   | neither  | iceA1+A2   | PZ1+PZ2  |
| Hp_A-6   | h110 | AKOR01 | North America  | hpAfrica1 | gastritis    | cag+    | s1-m1 | i1-d1 | babA2+   | short  | 917+918  | only iceA2 | PZ1+PZ2  |
| Hp_A-8   | h111 | AKOS01 | North America  | hpAfrica1 | gastritis    | cag+    | s1-m1 | i1-d1 | babA2+   | short  | 917+918  | only iceA2 | PZ1 only |
| Hp_A-9   | h112 | AKOC01 | North America  | hpEurope  | peptic ulcer | cag+    | s1-m2 | i2-d2 | babA2+   | long   | 917+918  | only iceA2 | PZ2 only |
| Hp_H-1   | h113 | AOTX01 | North America  | hpAfrica1 | gastritis    | cag+    | s1-m1 | i1-d1 | babA2+   | short  | 917+918  | only iceA2 | PZ1 only |
| Hp_H-10  | h114 | AKPB01 | North America  | hpAfrica1 | gastritis    | cag+    | s1-m1 | i1-d1 | babA2+   | short  | 917 only | only iceA2 | PZ1 only |
| Hp_H-11  | h115 | AKPC01 | North America  | hpEurope  | gastritis    | cag+    | s1-m2 | i2-d2 | no babA2 | absent | neither  | only iceA2 | PZ2 only |
| Hp_H-16  | h116 | AKOF01 | North America  | hpAfrica1 | peptic ulcer | cag+    | s1-m1 | i1-d1 | babA2+   | absent | neither  | only iceA2 | PZ1+PZ2  |
| Hp_H-18  | h117 | AKPD01 | North America  | hpAfrica1 | gastritis    | cag+    | s1-m1 | i1-d1 | babA2+   | short  | 917+918  | only iceA2 | PZ1+PZ2  |
| Hp_H-19  | h118 | AKPE01 | North America  | hpAfrica1 | gastritis    | cag+    | s1-m1 | i1-d1 | babA2+   | short  | 917 only | only iceA2 | PZ1 only |
| Hp_H-21  | h119 | AKPF01 | North America  | hpAfrica1 | gastritis    | cag-neg | s1-m1 | i1-d1 | babA2+   | short  | 917+918  | only iceA2 | PZ1+PZ2  |
| Hp_H-23  | h120 | AKPG01 | North America  | hpAfrica1 | gastritis    | cag+    | s1-m1 | i1-d1 | babA2+   | long   | 917+918  | only iceA2 | PZ1 only |
| Hp_H-24  | h121 | AKOG01 | North America  | hpAfrica1 | peptic ulcer | cag+    | s1-m1 | i1-d1 | babA2+   | short  | 917+918  | iceA1 only | PZ1 only |
| Hp_H-24b | h122 | AKPY01 | North America  | hpAfrica1 | gastritis    | cag+    | s1-m1 | i1-d1 | no babA2 | short  | 917+918  | iceA1 only | PZ1 only |
| Hp_H-24c | h123 | AKPZ01 | North America  | hpAfrica1 | gastritis    | cag+    | s1-m1 | i1-d1 | babA2+   | short  | 917+918  | iceA1 only | PZ1 only |
| Hp_H-27  | h124 | AKOH01 | North America  | hpEurope  | peptic ulcer | cag-neg | s2-m2 | i2-d2 | no babA2 | long   | neither  | only iceA2 | PZ1+PZ2  |
| Hp_H-28  | h125 | AKOI01 | North America  | hpEurope  | peptic ulcer | cag+    | s1-m1 | i1-d1 | babA2+   | absent | neither  | iceA1+A2   | neither  |
| Hp_H-29  | h126 | AKOJ01 | North America  | hpAfrica1 | peptic ulcer | cag+    | s1-m1 | i1-d1 | babA2+   | short  | 917+918  | neither    | PZ1+PZ2  |
| Hp_H-3   | h127 | AKOX01 | North America  | hpAfrica1 | gastritis    | cag+    | s1-m1 | i1-d1 | babA2+   | long   | 917+918  | only iceA2 | PZ1+PZ2  |
| Hp_H-30  | h128 | AKOK01 | North America  | hpAfrica1 | peptic ulcer | cag+    | s1-m1 | i1-d1 | babA2+   | short  | 917+918  | only iceA2 | PZ1 only |
| Hp_H-34  | h129 | AKPH01 | North America  | hpAfrica1 | gastritis    | cag-neg | s1-m1 | i1-d1 | babA2+   | short  | 917+918  | iceA1+A2   | PZ2 only |
| Hp_H-36  | h130 | AKOL01 | North America  | hpAfrica1 | peptic ulcer | cag+    | s1-m1 | i1-d1 | babA2+   | short  | neither  | only iceA2 | PZ1+PZ2  |
| Hp_H-4   | h131 | AKOY01 | North America  | hpAfrica1 | gastritis    | cag+    | s1-m1 | i1-d1 | babA2+   | short  | neither  | iceA1 only | PZ1+PZ2  |
| Hp_H-41  | h132 | AKOM01 | North America  | hpAfrica1 | peptic ulcer | cag+    | s1-m1 | i1-d1 | babA2+   | short  | 917+918  | only iceA2 | PZ1 only |
| Hp_H-42  | h133 | AKON01 | North America  | hpAfrica1 | peptic ulcer | cag+    | s1-m1 | i1-d1 | babA2+   | short  | 917+918  | only iceA2 | PZ1+PZ2  |
| Hp_H-43  | h134 | AKOO01 | North America  | hpEurope  | peptic ulcer | cag-neg | s2-m2 | i2-d2 | no babA2 | absent | neither  | iceA1+A2   | PZ1+PZ2  |
| Hp_H-44  | h135 | AKOP01 | North America  | hpAfrica1 | peptic ulcer | cag+    | s1-m1 | i1-d1 | babA2+   | short  | 917+918  | iceA1 only | PZ1+PZ2  |
| Hp_H-45  | h136 | AKOQ01 | North America  | hpEurope  | peptic ulcer | cag+    | s1-m1 | i1-d1 | babA2+   | absent | neither  | iceA1 only | PZ1 only |
| Hp_H-5b  | h137 | AKQF01 | North America  | hpAfrica1 | gastritis    | cag+    | s1-m1 | i1-d1 | babA2+   | short  | 917+918  | only iceA2 | PZ2 only |
| Hp_H-6   | h138 | AKOZ01 | North America  | hpAfrica1 | gastritis    | cag+    | s1-m2 | i1-d1 | babA2+   | short  | 917+918  | only iceA2 | PZ1+PZ2  |
| Hp_H-9   | h139 | AKPA01 | North America  | hpEurope  | gastritis    | cag+    | s1-m1 | i1-d1 | babA2+   | long   | 917+918  | iceA1 only | PZ1+PZ2  |
| Hp_M1    | h140 | AKQN01 | North America  | hpAfrica1 | mouse        | cag+    | s1-m1 | i1-d1 | babA2+   | short  | 917+918  | iceA1 only | PZ1 only |
| Hp_M2    | h141 | AKQO01 | North America  | hpAfrica1 | mouse        | cag+    | s1-m1 | i1-d1 | babA2+   | short  | 917+918  | iceA1 only | PZ1 only |
| Hp_M3    | h142 | AKQP01 | North America  | hpAfrica1 | mouse        | cag+    | s1-m1 | i1-d1 | babA2+   | short  | 917+918  | iceA1 only | PZ1 only |
| Hp_M4    | h143 | AKQQ01 | North America  | hpAfrica1 | mouse        | cag+    | s1-m1 | i1-d1 | babA2+   | short  | 917+918  | iceA1 only | PZ1 only |
| Hp_M5    | h144 | AKQR01 | North America  | hpAfrica1 | mouse        | cag+    | s1-m1 | i1-d1 | babA2+   | short  | 917+918  | iceA1 only | PZ1 only |
| Hp_M6    | h145 | AKQS01 | North America  | hpAfrica1 | mouse        | cag+    | s1-m1 | i1-d1 | babA2+   | short  | 917+918  | iceA1 only | PZ1 only |
| Hp_M9    | h146 | AKQT01 | North America  | hpAfrica1 | mouse        | cag+    | s1-m1 | i1-d1 | babA2+   | short  | 917+918  | iceA1 only | PZ1 only |

|              |             |           |               |           |                    |         |       |       |          |        |          |            |          |
|--------------|-------------|-----------|---------------|-----------|--------------------|---------|-------|-------|----------|--------|----------|------------|----------|
| Hp_P-1       | h147        | AKPI01    | North America | hpAfrica1 | gastritis          | cag+    | s1-m1 | i1-d1 | babA2+   | short  | 917+918  | only iceA2 | PZ1+PZ2  |
| Hp_P-11      | h148        | AKPN01    | North America | hpAfrica1 | gastritis          | cag+    | s1-m1 | i1-d1 | no babA2 | long   | 917+918  | only iceA2 | PZ1+PZ2  |
| Hp_P-11b     | h149        | AKQH01    | North America | hpAfrica1 | gastritis          | cag+    | s1-m1 | i1-d1 | no babA2 | long   | 917+918  | only iceA2 | PZ1+PZ2  |
| Hp_P-13      | h150        | AKPO01    | North America | hpAfrica1 | gastritis          | cag+    | s1-m1 | i1-d1 | babA2+   | long   | 917+918  | only iceA2 | PZ1+PZ2  |
| Hp_P-13b     | h151        | AKQJ01    | North America | hpAfrica1 | gastritis          | cag+    | s1-m1 | i1-d1 | babA2+   | long   | 917+918  | only iceA2 | PZ1+PZ2  |
| Hp_P-15      | h152        | AKPP01    | North America | hpEurope  | gastritis          | cag-neg | s2-m2 | i2-d2 | no babA2 | absent | neither  | only iceA2 | PZ1+PZ2  |
| Hp_P-15b     | h153        | AKQJ01    | North America | hpEurope  | gastritis          | cag-neg | s2-m2 | i2-d2 | no babA2 | absent | neither  | only iceA2 | PZ1+PZ2  |
| Hp_P-16      | h154        | AKPQ01    | North America | hpEurope  | gastritis          | cag-neg | s2-m2 | i2-d2 | no babA2 | absent | neither  | iceA1 only | PZ2 only |
| Hp_P-1b      | h155        | AKQA01    | North America | hpAfrica1 | gastritis          | cag+    | s1-m1 | i1-d1 | babA2+   | short  | 917+918  | only iceA2 | PZ1+PZ2  |
| Hp_P-2       | h156        | AKPJ01    | North America | hpAfrica1 | gastritis          | cag+    | s1-m1 | i1-d1 | babA2+   | long   | 917+918  | only iceA2 | PZ1 only |
| Hp_P-23      | h157        | AKPR01    | North America | hpEurope  | gastritis          | cag-neg | s2-m2 | i2-d2 | no babA2 | absent | neither  | only iceA2 | PZ1+PZ2  |
| Hp_P-25      | h158        | AKPS01    | North America | hpAfrica1 | gastritis          | cag+    | s1-?  | i1-d1 | babA2+   | short  | 917+918  | only iceA2 | PZ1 only |
| Hp_P-25c     | h159        | AKQK01    | North America | hpAfrica1 | gastritis          | cag+    | s1-m1 | i1-d1 | babA2+   | short  | 917+918  | only iceA2 | PZ1 only |
| Hp_P-25d     | h160        | AKQL01    | North America | hpAfrica1 | gastritis          | cag+    | s1-m1 | i1-d1 | babA2+   | short  | 917+918  | only iceA2 | PZ1 only |
| Hp_P-26      | h161        | AKPT01    | North America | hpAfrica1 | gastritis          | cag+    | s1-m1 | i1-d1 | babA2+   | long   | 917+918  | only iceA2 | PZ1+PZ2  |
| Hp_P-28b     | h162        | AKQM01    | North America | hpAfrica1 | gastritis          | cag-neg | s1-m1 | i1-d1 | babA2+   | long   | 917+918  | only iceA2 | PZ2 only |
| Hp_P-2b      | h163        | AKQB01    | North America | hpAfrica1 | gastritis          | cag+    | s1-m1 | i1-d1 | babA2+   | long   | 917+918  | only iceA2 | PZ1 only |
| Hp_P-3       | h164        | AKPK01    | North America | hpAfrica1 | gastritis          | cag+    | s1-m1 | i1-d1 | no babA2 | short  | 917+918  | only iceA2 | PZ1 only |
| Hp_P-30      | h165        | AKPU01    | North America | hpEurope  | gastritis          | cag-neg | s2-m2 | i2-d2 | babA2+   | long   | 917+918  | only iceA2 | PZ2 only |
| Hp_P-3b      | h166        | AKQC01    | North America | hpAfrica1 | gastritis          | cag+    | s1-m1 | i1-d1 | babA2+   | short  | 917+918  | only iceA2 | PZ1 only |
| Hp_P-4       | h167        | AKPL01    | North America | hpAfrica1 | gastritis          | cag+    | s1-m1 | i1-d1 | babA2+   | short  | 917+918  | only iceA2 | PZ1 only |
| Hp_P-41      | h168        | AKPV01    | North America | hpAfrica1 | gastritis          | cag+    | ?-m1  | i1-d1 | babA2+   | short  | 917+918  | iceA1+A2   | PZ1+PZ2  |
| Hp_P-4c      | h169        | AKQD01    | North America | hpAfrica1 | gastritis          | cag+    | s1-m1 | i1-d1 | babA2+   | short  | 917+918  | only iceA2 | PZ1 only |
| Hp_P-4d      | h170        | AKQE01    | North America | hpAfrica1 | gastritis          | cag+    | s1-m1 | i1-d1 | babA2+   | short  | 917+918  | only iceA2 | PZ1 only |
| Hp_P-62      | h171        | AKPW01    | North America | hpAfrica1 | gastritis          | cag+    | s1-m1 | i1-d1 | babA2+   | short  | 917+918  | only iceA2 | PZ1+PZ2  |
| Hp_P-74      | h172        | AKPX01    | North America | hpEurope  | gastritis          | cag-neg | s1-m2 | i2-d2 | no babA2 | absent | neither  | only iceA2 | PZ1+PZ2  |
| Hp_P-8       | h173        | AKPM01    | North America | hpAfrica1 | gastritis          | cag-neg | s1-m1 | i1-d1 | babA2+   | short  | 917+918  | iceA1+A2   | PZ1 only |
| Hp_P-8b      | h174        | AKQG01    | North America | hpAfrica1 | gastritis          | cag-neg | s1-m1 | i1-d1 | babA2+   | short  | 917+918  | iceA1+A2   | PZ1 only |
| HP116Bi      | <b>h175</b> | APEN01    | Africa        | hpAfrica1 | unknown            | cag+    | s1-m1 | i1-d1 | no babA2 | short  | 917+918  | only iceA2 | PZ1+PZ2  |
| HP250AFii    | h176        | APEO01    | Africa        | hpAfrica1 | unknown            | cag+    | s1-m1 | i1-d1 | babA2+   | absent | only 918 | iceA1+A2   | neither  |
| HP250AFiii   | h177        | APEP01    | Africa        | hpAfrica1 | unknown            | cag+    | s1-m1 | i1-d1 | babA2+   | absent | only 918 | iceA1+A2   | neither  |
| HP250AFiV    | h178        | APEQ01    | Africa        | hpAfrica1 | unknown            | cag+    | s1-m1 | i1-d1 | babA2+   | absent | only 918 | iceA1+A2   | neither  |
| HP250ASi     | h179        | APER01    | Africa        | hpAfrica1 | unknown            | cag+    | s1-m1 | i1-d1 | babA2+   | absent | only 918 | iceA1+A2   | neither  |
| HP250ASii    | h180        | APES01    | Africa        | hpAfrica1 | unknown            | cag+    | s1-m1 | i1-d1 | no babA2 | absent | only 918 | iceA1+A2   | neither  |
| HP250BFi     | h181        | APET01    | Africa        | hpAfrica1 | unknown            | cag+    | s1-m1 | i1-d1 | babA2+   | absent | only 918 | iceA1+A2   | neither  |
| HP250BFii    | h182        | APEU01    | Africa        | hpAfrica1 | unknown            | cag+    | s1-m1 | i1-d1 | babA2+   | absent | only 918 | iceA1+A2   | neither  |
| HP250BFiii   | h183        | APEV01    | Africa        | hpAfrica1 | unknown            | cag+    | s1-m1 | i1-d1 | babA2+   | absent | only 918 | iceA1+A2   | neither  |
| HP250BFiV    | h184        | APEW01    | Africa        | hpAfrica1 | unknown            | cag+    | s1-m1 | i1-d1 | babA2+   | absent | only 918 | iceA1+A2   | neither  |
| HP250BSi     | h185        | APEX01    | Africa        | hpAfrica1 | unknown            | cag+    | s1-m1 | i1-d1 | babA2+   | absent | only 918 | iceA1+A2   | neither  |
| HP260AFi     | h186        | APEY01    | Africa        | hpAfrica1 | unknown            | cag+    | s1-m1 | i1-d1 | babA2+   | short  | 917+918  | iceA1 only | PZ1 only |
| HP260AFii    | h187        | APEZ01    | Africa        | hpAfrica1 | unknown            | cag+    | s1-m1 | i1-d1 | babA2+   | short  | 917+918  | iceA1 only | PZ1 only |
| HP260ASii    | h188        | APFA01    | Africa        | hpAfrica1 | unknown            | cag+    | s1-m1 | i1-d1 | babA2+   | short  | 917+918  | iceA1 only | PZ1 only |
| HP260BFii    | h189        | APFB01    | Africa        | hpAfrica1 | unknown            | cag-neg | s2-m2 | i2-d2 | babA2+   | long   | 917+918  | iceA1+A2   | neither  |
| HP260Bi      | h190        | APFC01    | Africa        | hpAfrica1 | unknown            | cag+    | s1-m1 | i1-d1 | babA2+   | short  | 917+918  | only iceA2 | PZ1+PZ2  |
| HP87hu       | h191        | CBRI01    | Europe        | hpEurope  | gerbil             | cag+    | s1-m1 | i1-d1 | no babA2 | absent | neither  | only iceA2 | PZ2 only |
| HP87P7       | h192        | CBRJ01    | Europe        | hpEurope  | gerbil             | cag+    | s1-m1 | i1-d1 | no babA2 | long   | 917+918  | only iceA2 | PZ1+PZ2  |
| HP87P7tlpDRI | h193        | CBRL01    | Europe        | hpEurope  | gerbil             | cag+    | s1-m1 | i1-d1 | no babA2 | long   | 917+918  | only iceA2 | PZ1+PZ2  |
| HP87tlpD     | h194        | CBRK01    | Europe        | hpEurope  | gerbil             | cag+    | s1-m1 | i1-d1 | no babA2 | long   | 917+918  | only iceA2 | PZ1+PZ2  |
| HPAG1        | <b>h195</b> | NC_008086 | Europe        | hpEurope  | atrophic gastritis | cag+    | s1-m1 | i1-d1 | babA2+   | absent | neither  | iceA1 only | neither  |
| HPARG63      | h196        | CBKY01    | South America | hpEurope  | unknown            | cag+    | s1-m1 | i1-d1 | babA2+   | long   | neither  | iceA1 only | PZ1+PZ2  |
| HPARG8G      | h197        | CBKZ01    | South America | hpEurope  | unknown            | cag+    | s1-m2 | i1-d1 | babA2+   | absent | neither  | iceA1 only | neither  |

|             |             |           |                   |            |                       |         |       |       |          |        |          |            |          |
|-------------|-------------|-----------|-------------------|------------|-----------------------|---------|-------|-------|----------|--------|----------|------------|----------|
| HUP-B14     | <b>h200</b> | CP003486  | Europe            | hpEurope   | unknown               | cag+    | s1-m1 | i1-d1 | babA2+   | absent | neither  | only iceA2 | neither  |
| India7      | <b>h201</b> | CP002331  | (Other) India     | hpAsia2    | unknown               | cag+    | s1-m2 | i2-d2 | babA2+   | absent | neither  | only iceA2 | neither  |
| J99         | <b>h202</b> | NC_000921 | North America     | hpAfrica1  | peptic ulcer          | cag+    | s1-m1 | i1-d1 | babA2+   | short  | 917+918  | only iceA2 | PZ1+PZ2  |
| Lithuania75 | <b>h203</b> | CP002334  | Europe            | hpEurope   | unknown               | cag+    | s1-m1 | i1-d1 | babA2+   | absent | neither  | only iceA2 | PZ2 only |
| MALT        | h204        | AOTV01    | North America     | hpEurope   | MALT lymphoma         | cag-neg | s2-m2 | i2-d2 | no babA2 | absent | neither  | iceA1+A2   | neither  |
| N6          | h205        | CAHX01    | Europe            | hpEurope   | gastritis             | cag+    | s1-m2 | i1-d1 | no babA2 | absent | neither  | iceA1 only | PZ1+PZ2  |
| NAB47       | <b>h206</b> | AJFA02    | (Other) India     | hpAsia2    | unknown               | cag+    | ?-m1  | i1-d? | babA2+   | absent | neither  | iceA1 only | PZ1 only |
| NAD1        | h207        | AJGJ02    | (Other) India     | hpEurope   | unknown               | cag+    | ?-m1  | i1-d? | babA2+   | absent | only 918 | iceA1 only | PZ1 only |
| NAK7        | h208        | AONJ01    | (Other) India     | hpAsia2    | unknown               | cag+    | s1-m1 | i1-d1 | babA2+   | absent | neither  | iceA1 only | neither  |
| NCTC_11637  | h209        | AIHX01    | (Other) Australia | hpEurope   | gastritis             | cag+    | ?-m1  | i1-d1 | babA2+   | absent | only 918 | iceA1+A2   | neither  |
| NQ1671      | h210        | CADM01    | South America     | hpEurope   | unknown               | cag+    | s1-m1 | i1-d1 | babA2+   | short  | 917+918  | only iceA2 | PZ1 only |
| NQ1701      | h211        | CADH01    | South America     | hpEurope   | unknown               | cag+    | s1-m1 | i1-d1 | babA2+   | short  | 917+918  | iceA1 only | PZ1+PZ2  |
| NQ1707      | h212        | CADJ01    | South America     | hpEurope   | unknown               | cag+    | s1-m1 | i1-d1 | babA2+   | short  | 917+918  | only iceA2 | PZ1+PZ2  |
| NQ1712      | h213        | CADF01    | South America     | hpEurope   | unknown               | cag-neg | s1-m1 | i1-d1 | no babA2 | long   | 917+918  | iceA1+A2   | neither  |
| NQ315       | h214        | CADE01    | South America     | hpEurope   | unknown               | cag+    | s1-m1 | i1-d1 | no babA2 | long   | 917+918  | iceA1 only | neither  |
| NQ352       | h215        | CADG01    | South America     | hpEurope   | unknown               | cag+    | s1-m1 | i1-d1 | babA2+   | short  | 917+918  | iceA1 only | PZ1+PZ2  |
| NQ367       | h216        | CADL01    | South America     | hpEurope   | unknown               | cag+    | s1-m1 | i1-d1 | babA2+   | short  | 917+918  | iceA1+A2   | PZ1 only |
| NQ392       | h217        | CADI01    | South America     | hpEurope   | unknown               | cag+    | s1-m1 | i1-d1 | no babA2 | short  | 917+918  | only iceA2 | PZ1+PZ2  |
| NQ4044      | h218        | AKNW01    | South America     | hpEurope   | intestinal metaplasia | cag+    | ?-m1  | i1-d1 | babA2+   | long   | 917+918  | iceA1 only | PZ2 only |
| NQ4053      | h219        | AKNV01    | South America     | hpEurope   | dysplasia             | cag-neg | s1-m1 | i1-d1 | babA2+   | long   | 917+918  | iceA1 only | PZ1 only |
| NQ4060      | h220        | CADK01    | South America     | hpEurope   | unknown               | cag+    | s1-m1 | i1-d1 | babA2+   | short  | 917+918  | only iceA2 | PZ1+PZ2  |
| NQ4076      | h221        | AKNX01    | South America     | hpEurope   | atrophic gastritis    | cag+    | s1-m1 | i1-d1 | babA2+   | absent | neither  | iceA1+A2   | PZ1+PZ2  |
| NQ4099      | h222        | AKNU01    | South America     | hpEurope   | dysplasia             | cag+    | s1-m1 | i1-d1 | babA2+   | absent | neither  | only iceA2 | PZ2 only |
| NQ4110      | h223        | AKNZ01    | South America     | hpEurope   | atrophic gastritis    | cag-neg | s2-m2 | i2-d2 | no babA2 | absent | neither  | only iceA2 | PZ1 only |
| NQ4161      | h224        | AKNY01    | South America     | hpEurope   | atrophic gastritis    | cag-neg | s1-m1 | i1-d1 | babA2+   | absent | neither  | only iceA2 | PZ2 only |
| NQ4191      | h225        | CADN01    | South America     | hpEurope   | unknown               | cag+    | s1-m1 | i1-d1 | babA2+   | short  | 917+918  | iceA1+A2   | PZ1 only |
| NQ4200      | h226        | AKNS01    | South America     | hpEurope   | intestinal metaplasia | cag+    | s1-m1 | i1-d1 | babA2+   | long   | 917+918  | only iceA2 | PZ2 only |
| NQ4216      | h227        | AKNR01    | South America     | hpEurope   | dysplasia             | cag+    | s1-m1 | i1-d1 | babA2+   | absent | neither  | iceA1 only | neither  |
| NQ4228      | h228        | AKNT01    | South America     | hpEurope   | intestinal metaplasia | cag+    | s1-m1 | i1-d1 | babA2+   | short  | 917+918  | only iceA2 | PZ1 only |
| OK113       | <b>h229</b> | AP012600  | East Asia         | hspEAsia   | unknown               | cag+    | s1-m1 | i1-d1 | babA2+   | absent | neither  | iceA1 only | neither  |
| OK310       | <b>h230</b> | AP012601  | East Asia         | hspEAsia   | unknown               | cag+    | s1-m1 | i1-d1 | babA2+   | absent | neither  | iceA1+A2   | PZ2 only |
| P12         | <b>h231</b> | NC_011498 | Europe            | hpEurope   | peptic ulcer          | cag+    | s1-m1 | i1-d1 | babA2+   | absent | neither  | iceA1 only | PZ1+PZ2  |
| P79         | h232        | AIHW01    | Europe            | hpEurope   | unknown               | cag+    | ?-m1  | i1-d1 | no babA2 | absent | neither  | iceA1 only | PZ1+PZ2  |
| PeCan18     | <b>h233</b> | CP003475  | South America     | hpAfrica1  | gastritis             | cag+    | s1-m1 | i1-d1 | babA2+   | absent | neither  | only iceA2 | PZ2 only |
| PeCan4      | <b>h234</b> | NC_014555 | South America     | hpEurope   | gastric cancer        | cag+    | s1-m1 | i1-d1 | babA2+   | absent | neither  | iceA1 only | PZ1 only |
| Puno120     | <b>h235</b> | CP002980  | South America     | hspAmerInd | gastritis             | cag+    | s1-m1 | i1-d1 | no babA2 | absent | neither  | only iceA2 | PZ2 only |
| Puno135     | <b>h236</b> | CP002982  | South America     | hspAmerInd | gastritis             | cag+    | s1-m1 | i1-d1 | no babA2 | long   | 917+918  | iceA1 only | PZ2 only |
| PZ5004      | h237        | ASZF01    | South America     | hpEurope   | unknown               | cag+    | s1-m1 | i1-d? | no babA2 | short  | 917+918  | iceA1 only | neither  |
| PZ5024      | h238        | ASYS01    | South America     | hpAfrica1  | unknown               | cag+    | ?-m1  | i1-d1 | babA2+   | short  | 917+918  | iceA1+A2   | neither  |
| PZ5026      | h239        | ASYT01    | South America     | hpEurope   | unknown               | cag+    | s1-m1 | i1-d1 | babA2+   | short  | 917+918  | iceA1+A2   | PZ1 only |
| PZ5056      | h240        | ASYU01    | South America     | hpEurope   | unknown               | cag+    | s1-m1 | i1-d1 | no babA2 | short  | 917+918  | iceA1 only | PZ1 only |
| PZ5080      | h241        | ASYV01    | South America     | hpEurope   | unknown               | cag+    | s1-m1 | i1-d1 | no babA2 | short  | neither  | iceA1 only | PZ1+PZ2  |
| PZ5086      | h242        | ASYW01    | South America     | hpAfrica1  | unknown               | cag+    | ?-m1  | i2-?  | babA2+   | absent | only 918 | iceA1 only | PZ1 only |
| R018c       | h243        | AMOQ01    | North America     | hpEurope   | unknown               | cag+    | s1-m2 | i1-d2 | babA2+   | absent | neither  | only iceA2 | PZ1+PZ2  |
| R030b       | <b>h244</b> | AMOR01    | North America     | hpAfrica1  | unknown               | cag+    | s1-m1 | i1-d1 | no babA2 | absent | neither  | iceA1 only | PZ1 only |
| R036d       | h245        | AMOT01    | North America     | hpEurope   | unknown               | cag+    | s2-m2 | i2-d2 | babA2+   | absent | neither  | only iceA2 | PZ1+PZ2  |
| R037c       | h246        | AMOU01    | North America     | hpEurope   | unknown               | cag-neg | s2-m2 | i2-d2 | babA2+   | long   | 917+918  | iceA1 only | PZ1+PZ2  |
| R038b       | h247        | AMOV01    | North America     | hpEurope   | unknown               | cag-neg | s2-m2 | i2-d2 | no babA2 | long   | 917+918  | iceA1 only | neither  |
| R046Wa      | h248        | AMOW01    | North America     | hpEurope   | unknown               | cag-neg | ?-m1  | i1-d1 | babA2+   | absent | neither  | iceA1 only | PZ1+PZ2  |
| R055a       | h249        | AMOX01    | North America     | hpEurope   | unknown               | cag+    | s1-m2 | i2-d2 | babA2+   | long   | 917+918  | iceA1 only | PZ1 only |
| R056a       | h250        | AMOY01    | North America     | hpEurope   | unknown               | cag+    | s1-m2 | i1-d2 | babA2+   | absent | neither  | only iceA2 | PZ1+PZ2  |



|               |      |           |               |            |                |         |       |       |          |        |          |            |          |
|---------------|------|-----------|---------------|------------|----------------|---------|-------|-------|----------|--------|----------|------------|----------|
| R32b          | h251 | AMOS01    | North America | hpEurope   | unknown        | cag+    | s1-m1 | i1-d1 | babA2+   | absent | neither  | only iceA2 | PZ1 only |
| Rif1          | h252 | CP003905  | Europe        | hpEurope   | unknown        | cag+    | s1-m1 | i1-d1 | no babA2 | absent | neither  | iceA1 only | PZ2 only |
| Rif2          | h253 | CP003906  | Europe        | hpEurope   | unknown        | cag+    | s1-m1 | i1-d1 | no babA2 | absent | neither  | iceA1 only | PZ2 only |
| Sat464        | h254 | CP002071  | South America | hspAmerInd | unknown        | cag-neg | s1-m1 | i1-d1 | babA2+   | absent | neither  | only iceA2 | neither  |
| Shi112        | h255 | CP003474  | South America | hspAmerInd | gastritis      | cag+    | s1-m2 | i2-d2 | babA2+   | long   | 917+918  | only iceA2 | neither  |
| Shi169        | h256 | CP003473  | South America | hspAmerInd | gastritis      | cag+    | s1-m1 | i1-d1 | babA2+   | long   | 917+918  | only iceA2 | neither  |
| Shi417        | h257 | CP003472  | South America | hspAmerInd | gastritis      | cag+    | s1-m1 | i1-d1 | babA2+   | long   | 917+918  | iceA1 only | neither  |
| Shi470        | h258 | NC_010698 | South America | hspAmerInd | peptic ulcer   | cag+    | s1-m1 | i1-d1 | babA2+   | long   | 917+918  | only iceA2 | neither  |
| SJM180        | h259 | NC_014560 | South America | hpEurope   | gastritis      | cag+    | s1-m1 | i1-d1 | babA2+   | absent | neither  | iceA1 only | PZ1+PZ2  |
| SNT49         | h260 | CP002983  | (Other) India | hpAsia2    | unknown        | cag+    | s1-m2 | i1-d1 | babA2+   | long   | 917+918  | only iceA2 | PZ1 only |
| SouthAfrica20 | h261 | CP006691  | Africa        | hpAfrica2  | unknown        | cag-neg | s2-m2 | i2-d2 | babA2+   | long   | 917+918  | neither    | PZ1 only |
| SouthAfrica50 | h262 | AVNI01    | Africa        | hpAfrica2  | unknown        | cag-neg | s2-m2 | i2-d2 | babA2+   | long   | 917+918  | iceA1 only | neither  |
| SouthAfrica7  | h263 | CP002336  | Africa        | hpAfrica2  | unknown        | cag-neg | s2-?  | i2-?  | babA2+   | long   | 917+918  | iceA1 only | PZ1 only |
| UM007         | h264 | AONM01    | East Asia     | hspEAsia   | unknown        | cag+    | s1-m2 | i1-d1 | no babA2 | short  | neither  | iceA1 only | neither  |
| UM018         | h265 | AONK01    | East Asia     | hpAsia2    | unknown        | cag+    | s1-m1 | i1-d1 | babA2+   | absent | only 918 | iceA1 only | PZ1+PZ2  |
| UM023         | h266 | AUSK01    | East Asia     | hspEAsia   | peptic ulcer   | cag+    | s1-m1 | i1-d1 | babA2+   | absent | neither  | iceA1 only | PZ2 only |
| UM032         | h267 | CP005490  | East Asia     | hspEAsia   | unknown        | cag+    | s1-m2 | i1-d1 | babA2+   | absent | neither  | iceA1 only | PZ1 only |
| UM034         | h268 | AONN01    | East Asia     | hspEAsia   | unknown        | cag+    | s1-m2 | i1-d1 | babA2+   | long   | only 918 | iceA1+A2   | PZ2 only |
| UM037         | h269 | AUSI01    | East Asia     | hpEurope   | gastric cancer | cag+    | s1-?  | i1-d1 | babA2+   | absent | only 918 | only iceA2 | PZ1+PZ2  |
| UM038         | h270 | AUSL01    | East Asia     | hspEAsia   | dyspepsia      | cag+    | s1-m2 | i1-d1 | babA2+   | short  | neither  | iceA1 only | PZ2 only |
| UM045         | h271 | AONO01    | East Asia     | hpEurope   | unknown        | cag+    | s1-m1 | i1-d1 | no babA2 | absent | neither  | iceA1+A2   | PZ1 only |
| UM054         | h272 | AONL01    | East Asia     | hpAsia2    | unknown        | cag+    | s2-m2 | i2-d2 | babA2+   | absent | only 918 | only iceA2 | PZ1 only |
| UM065         | h273 | AUSM01    | East Asia     | hspEAsia   | peptic ulcer   | cag+    | s1-m1 | i1-d1 | no babA2 | absent | neither  | iceA1 only | neither  |
| UM066         | h274 | AUSJ01    | East Asia     | hspEAsia   | peptic ulcer   | cag+    | s1-m2 | i1-d1 | babA2+   | long   | 917+918  | iceA1 only | PZ2 only |
| UM067         | h275 | AUSN01    | East Asia     | hpAsia2    | peptic ulcer   | cag+    | s1-m2 | i2-d2 | babA2+   | absent | neither  | only iceA2 | PZ2 only |
| UM077         | h276 | AUSQ01    | East Asia     | hspEAsia   | peptic ulcer   | cag+    | s1-m1 | i1-d1 | babA2+   | short  | neither  | iceA1 only | PZ2 only |
| UM084         | h277 | AUSO01    | East Asia     | hpAsia2    | peptic ulcer   | cag+    | s1-m1 | i1-d1 | babA2+   | absent | neither  | iceA1 only | PZ2 only |
| UM085         | h278 | AUSP01    | East Asia     | hspEAsia   | dyspepsia      | cag+    | s1-m2 | i1-d1 | babA2+   | short  | neither  | iceA1 only | PZ2 only |
| UM111         | h279 | AUSR01    | East Asia     | hspEAsia   | dyspepsia      | cag+    | s1-m2 | i1-d1 | babA2+   | short  | neither  | iceA1 only | PZ1 only |
| UM114         | h280 | AUSS01    | East Asia     | hpAsia2    | peptic ulcer   | cag+    | s1-m1 | i1-d1 | babA2+   | absent | neither  | only iceA2 | PZ2 only |
| UM298         | h281 | CP006610  | East Asia     | hspEAsia   | unknown        | cag+    | s1-m2 | i1-d1 | babA2+   | absent | neither  | iceA1 only | neither  |
| UM299         | h282 | CP005491  | East Asia     | hspEAsia   | unknown        | cag+    | s1-m2 | i1-d1 | babA2+   | absent | neither  | iceA1 only | neither  |
| UMB_G1        | h283 | AOTV01    | North America | hpEurope   | unknown        | cag-neg | s2-m2 | i2-d2 | no babA2 | absent | neither  | iceA1+A2   | neither  |
| v225          | h284 | CP001582  | South America | hspAmerInd | gastritis      | cag+    | s1-m1 | i1-d1 | babA2+   | absent | neither  | iceA1 only | neither  |
| wls-5-12      | h285 | AUPY01    | East Asia     | hspEAsia   | gastritis      | cag+    | s1-m1 | i1-d1 | babA2+   | absent | only 918 | iceA1+A2   | PZ1 only |
| wls-5-3       | h286 | AUPD01    | East Asia     | hspEAsia   | gastritis      | cag+    | s1-m1 | i1-d1 | babA2+   | short  | neither  | only iceA2 | PZ2 only |
| X47-2AL       | h287 | AWNG01    | North America | hpEurope   | cat            | cag-neg | s1-m2 | i2-d2 | no babA2 | long   | neither  | iceA1 only | PZ1+PZ2  |
| XZ274         | h288 | CP003419  | East Asia     | hspEAsia   | gastric cancer | cag+    | s1-m1 | i1-d1 | babA2+   | long   | 917+918  | iceA1 only | neither  |
| SA144A        | h289 | CBNJ01    | Africa        | hpAfrica2  | unknown        | cag-neg | ?-?   | i2-?  | no babA2 | long   | only 918 | iceA1 only | PZ1+PZ2  |
| SA144C        | h290 | CBOX01    | Africa        | hpAfrica2  | unknown        | cag-neg | ?-?   | i2-?  | no babA2 | long   | only 918 | iceA1 only | PZ1+PZ2  |
| SA146A        | h291 | CBPZ01    | Africa        | hpAfrica1  | unknown        | cag+    | s1-m1 | i1-d1 | babA2+   | short  | 917+918  | neither    | PZ1+PZ2  |
| SA146C        | h292 | CBPF01    | Africa        | hpAfrica1  | unknown        | cag+    | s1-m1 | i1-d1 | babA2+   | short  | 917+918  | neither    | PZ1+PZ2  |
| SA155A        | h293 | CBNZ01    | Africa        | hpAfrica2  | unknown        | cag-neg | s2-?  | i2-d1 | no babA2 | long   | 917+918  | neither    | PZ2 only |
| SA155C        | h294 | CBOH01    | Africa        | hpAfrica2  | unknown        | cag-neg | s2-?  | i2-?  | no babA2 | long   | 917+918  | neither    | PZ2 only |
| SA156A        | h295 | CBNR01    | Africa        | hpAfrica1  | unknown        | cag+    | s1-m1 | i1-d1 | babA2+   | short  | 917+918  | iceA1 only | PZ1+PZ2  |
| SA157A        | h296 | CBPV01    | Africa        | hpAfrica1  | unknown        | cag+    | s1-m1 | i1-d1 | babA2+   | short  | 917+918  | only iceA2 | PZ1+PZ2  |
| SA157C        | h297 | CBNF01    | Africa        | hpAfrica1  | unknown        | cag+    | s1-m1 | i1-d1 | babA2+   | short  | 917+918  | only iceA2 | PZ1 only |
| SA158A        | h298 | CBPJ01    | Africa        | hpAfrica1  | unknown        | cag+    | s1-m1 | i1-d1 | no babA2 | short  | 917+918  | iceA1 only | PZ1 only |
| SA158C        | h299 | CBOL01    | Africa        | hpAfrica1  | unknown        | cag+    | s1-m1 | i1-d1 | no babA2 | short  | 917+918  | iceA1 only | PZ1 only |
| SA160A        | h300 | CBPY01    | Africa        | hpAfrica2  | unknown        | cag-neg | s2-?  | i2-?  | no babA2 | long   | neither  | neither    | PZ2 only |
| SA160C        | h301 | CBQN01    | Africa        | hpAfrica2  | unknown        | cag-neg | s2-?  | i2-?  | no babA2 | long   | neither  | neither    | PZ2 only |



|        |      |        |        |           |         |         |       |       |          |        |          |            |          |
|--------|------|--------|--------|-----------|---------|---------|-------|-------|----------|--------|----------|------------|----------|
| SA161A | h302 | CBPE01 | Africa | hpAfrica1 | unknown | cag-neg | s1-m1 | i1-d1 | babA2+   | short  | 917+918  | only iceA2 | neither  |
| SA161C | h303 | CBNM01 | Africa | hpAfrica1 | unknown | cag+    | s1-m1 | i1-d1 | babA2+   | short  | 917+918  | only iceA2 | PZ1 only |
| SA162A | h304 | CBOS01 | Africa | hpAfrica1 | unknown | cag+    | s1-m1 | i1-d1 | babA2+   | short  | 917+918  | only iceA2 | PZ1+PZ2  |
| SA162C | h305 | CBNQ01 | Africa | hpAfrica1 | unknown | cag+    | s1-m1 | i1-d1 | babA2+   | short  | 917+918  | only iceA2 | PZ1+PZ2  |
| SA163A | h306 | CBOG01 | Africa | hpAfrica1 | unknown | cag+    | s1-m1 | i1-d1 | no babA2 | short  | 917+918  | iceA1 only | PZ1 only |
| SA163C | h307 | CBOW01 | Africa | hpAfrica1 | unknown | cag+    | s1-m1 | i1-d1 | no babA2 | short  | 917+918  | iceA1 only | PZ1 only |
| SA164A | h308 | CBQK01 | Africa | hpEurope  | unknown | cag-neg | s2-m2 | i2-d2 | babA2+   | long   | 917+918  | iceA1+A2   | PZ1+PZ2  |
| SA164C | h309 | CBQM01 | Africa | hpEurope  | unknown | cag-neg | s2-m2 | i2-d2 | babA2+   | short  | 917+918  | iceA1+A2   | PZ2 only |
| SA165A | h310 | CBQD01 | Africa | hpEurope  | unknown | cag-neg | s2-m2 | i2-d2 | babA2+   | long   | 917+918  | only iceA2 | PZ1+PZ2  |
| SA165C | h311 | CBQU01 | Africa | hpEurope  | unknown | cag-neg | s2-m2 | i2-d2 | babA2+   | short  | 917+918  | iceA1+A2   | PZ2 only |
| SA166A | h312 | CBPA01 | Africa | hpAfrica2 | unknown | cag-neg | ?-?   | i2-?  | no babA2 | short  | 917+918  | iceA1 only | neither  |
| SA168A | h313 | CBPU01 | Africa | hpAfrica1 | unknown | cag+    | s1-m2 | i1-d1 | babA2+   | short  | 917+918  | only iceA2 | PZ1+PZ2  |
| SA168C | h314 | CBOC01 | Africa | hpAfrica1 | unknown | cag+    | s1-m2 | i1-d1 | babA2+   | short  | 917+918  | only iceA2 | PZ1+PZ2  |
| SA169C | h315 | CBOK01 | Africa | hpAfrica2 | unknown | cag-neg | s2-?  | i2-?  | no babA2 | short  | 917+918  | iceA1 only | PZ2 only |
| SA170A | h316 | CBMZ01 | Africa | hpAfrica1 | unknown | cag+    | s1-m1 | i1-d1 | babA2+   | short  | 917+918  | iceA1 only | PZ1 only |
| SA170C | h317 | CBQL01 | Africa | hpAfrica1 | unknown | cag+    | s1-m1 | i1-d1 | babA2+   | short  | 917+918  | iceA1 only | PZ1 only |
| SA171A | h318 | CBOA01 | Africa | hpEurope  | unknown | cag-neg | ?-?   | i2-?  | babA2+   | long   | 917+918  | iceA1+A2   | PZ2 only |
| SA171C | h319 | CBPC01 | Africa | hpEurope  | unknown | cag-neg | ?-?   | i2-?  | babA2+   | long   | 917+918  | iceA1+A2   | PZ2 only |
| SA172A | h320 | CBOY01 | Africa | hpEurope  | unknown | cag-neg | ?-?   | i2-?  | babA2+   | long   | 917+918  | iceA1+A2   | PZ2 only |
| SA172C | h321 | CBPG01 | Africa | hpAfrica2 | unknown | cag-neg | s2-?  | i2-?  | no babA2 | absent | neither  | iceA1 only | PZ1+PZ2  |
| SA173A | h322 | CBOU01 | Africa | hpEurope  | unknown | cag-neg | s2-m2 | i2-d2 | babA2+   | absent | neither  | only iceA2 | neither  |
| SA173C | h323 | CBNG01 | Africa | hpEurope  | unknown | cag-neg | s2-m2 | i2-d2 | babA2+   | absent | neither  | only iceA2 | PZ2 only |
| SA174A | h324 | CBPS01 | Africa | hpAfrica2 | unknown | cag-neg | ?-?   | i2-?  | no babA2 | long   | 917+918  | iceA1 only | PZ2 only |
| SA175A | h325 | CBPO01 | Africa | hpAfrica2 | unknown | cag-neg | ?-?   | i2-?  | babA2+   | long   | 917+918  | iceA1 only | PZ1 only |
| SA175C | h326 | CBOI01 | Africa | hpAfrica2 | unknown | cag-neg | ?-?   | i2-?  | babA2+   | long   | 917+918  | iceA1 only | PZ1 only |
| SA194A | h327 | CBNK01 | Africa | hpAfrica2 | unknown | cag-neg | ?-?   | i2-?  | babA2+   | long   | neither  | iceA1 only | neither  |
| SA194C | h328 | CBPW01 | Africa | hpAfrica2 | unknown | cag-neg | ?-?   | i2-?  | babA2+   | long   | neither  | iceA1 only | neither  |
| SA210A | h329 | CBNW01 | Africa | hpAfrica1 | unknown | cag+    | s1-m1 | i1-d1 | no babA2 | short  | 917+918  | iceA1 only | PZ1+PZ2  |
| SA210C | h330 | CBOQ01 | Africa | hpAfrica1 | unknown | cag+    | s1-m1 | i1-d1 | no babA2 | short  | 917+918  | iceA1 only | PZ1+PZ2  |
| SA213A | h331 | CBOM01 | Africa | hpEurope  | unknown | cag-neg | ?-m1  | i2-?  | no babA2 | absent | only 918 | iceA1+A2   | PZ1 only |
| SA214A | h332 | CBPK01 | Africa | hpAfrica1 | unknown | cag-neg | s1-m1 | i1-d1 | no babA2 | short  | 917+918  | iceA1+A2   | neither  |
| SA214C | h333 | CBNS01 | Africa | hpAfrica1 | unknown | cag-neg | s1-m1 | i1-d1 | no babA2 | short  | 917+918  | only iceA2 | PZ1 only |
| SA215C | h334 | CBNO01 | Africa | hpAfrica1 | unknown | cag+    | s1-m1 | i1-d1 | no babA2 | short  | 917+918  | only iceA2 | PZ1 only |
| SA216C | h335 | CBNC01 | Africa | hpAfrica1 | unknown | cag+    | s1-m1 | i1-d1 | no babA2 | short  | only 918 | iceA1+A2   | PZ1 only |
| SA220A | h336 | CBND01 | Africa | hpAfrica1 | unknown | cag+    | s1-m2 | i1-d1 | no babA2 | short  | 917+918  | only iceA2 | PZ1+PZ2  |
| SA220C | h337 | CBPX01 | Africa | hpAfrica1 | unknown | cag+    | s1-m2 | i1-d1 | no babA2 | short  | 917+918  | only iceA2 | PZ1+PZ2  |
| SA221A | h338 | CBQA01 | Africa | hpEurope  | unknown | cag-neg | s2-m2 | i2-d2 | babA2+   | absent | only 918 | iceA1+A2   | PZ1 only |
| SA221C | h339 | CBPT01 | Africa | hpEurope  | unknown | cag-neg | s2-m2 | i2-d2 | babA2+   | absent | only 918 | iceA1+A2   | PZ1+PZ2  |
| SA222A | h340 | CBQE01 | Africa | hpAsia2   | unknown | cag+    | s1-m1 | i1-d1 | babA2+   | absent | neither  | neither    | PZ1 only |
| SA222C | h341 | CBON01 | Africa | hpAsia2   | unknown | cag-neg | s1-m1 | i1-d1 | babA2+   | absent | neither  | iceA1 only | PZ1 only |
| SA224A | h342 | CBOB01 | Africa | hpAfrica1 | unknown | cag+    | s1-m1 | i1-d1 | babA2+   | short  | 917+918  | only iceA2 | PZ1+PZ2  |
| SA224C | h343 | CBPP01 | Africa | hpAfrica1 | unknown | cag+    | s1-m1 | i1-d1 | babA2+   | short  | 917+918  | only iceA2 | PZ1+PZ2  |
| SA226A | h344 | CBNH01 | Africa | hpAfrica1 | unknown | cag+    | s1-m1 | i1-d1 | babA2+   | long   | 917+918  | only iceA2 | PZ1+PZ2  |
| SA227A | h345 | CBNX01 | Africa | hpAfrica1 | unknown | cag+    | s1-m1 | i1-d1 | no babA2 | short  | 917+918  | only iceA2 | PZ1 only |
| SA233A | h346 | CBMX01 | Africa | hpAfrica2 | unknown | cag-neg | s2-?  | i2-?  | no babA2 | long   | only 918 | iceA1 only | PZ1 only |
| SA233C | h347 | CBPD01 | Africa | hpAfrica2 | unknown | cag-neg | ?-?   | i2-?  | no babA2 | long   | only 918 | iceA1 only | PZ1 only |
| SA251A | h348 | CBOZ01 | Africa | hpAfrica2 | unknown | cag-neg | ?-?   | i2-?  | no babA2 | long   | only 918 | neither    | PZ1+PZ2  |
| SA251C | h349 | CBQC01 | Africa | hpAfrica2 | unknown | cag-neg | ?-?   | i2-?  | no babA2 | long   | only 918 | iceA1 only | PZ1 only |
| SA252A | h350 | CBNP01 | Africa | hpAfrica1 | unknown | cag+    | s1-m1 | i1-d1 | babA2+   | short  | 917+918  | iceA1+A2   | PZ1+PZ2  |
| SA252C | h351 | CBOV01 | Africa | hpAfrica1 | unknown | cag+    | s1-m1 | i1-d1 | babA2+   | short  | 917+918  | only iceA2 | PZ1+PZ2  |
| SA253A | h352 | CBOJ01 | Africa | hpAfrica2 | unknown | cag-neg | s2-?  | i2-?  | babA2+   | long   | neither  | neither    | PZ1+PZ2  |

|         |      |        |                   |           |         |         |       |       |          |        |          |            |          |
|---------|------|--------|-------------------|-----------|---------|---------|-------|-------|----------|--------|----------|------------|----------|
| SA253C  | h353 | CBOR01 | Africa            | hpAfrica2 | unknown | cag-neg | s2-?  | i2-?  | no babA2 | long   | neither  | neither    | PZ1+PZ2  |
| SA29A   | h354 | CBMV01 | Africa            | hpAfrica2 | unknown | cag-neg | ?-?   | i2-?  | babA2+   | long   | 917+918  | iceA1 only | neither  |
| SA29C   | h355 | CBNI01 | Africa            | hpAfrica1 | unknown | cag+    | s1-m1 | i1-d1 | babA2+   | short  | 917+918  | only iceA2 | PZ1+PZ2  |
| SA300A  | h356 | CBQG01 | Africa            | hpAfrica1 | unknown | cag+    | s1-m1 | i1-d1 | no babA2 | short  | 917+918  | iceA1 only | PZ1 only |
| SA300C  | h357 | CBPL01 | Africa            | hpAfrica1 | unknown | cag+    | s1-m1 | i1-d1 | no babA2 | short  | 917+918  | iceA1 only | PZ1 only |
| SA301A  | h358 | CBPH01 | Africa            | hpAfrica1 | unknown | cag+    | s1-m1 | i1-d1 | babA2+   | short  | 917+918  | only iceA2 | PZ1 only |
| SA301C  | h359 | CBNT01 | Africa            | hpAfrica1 | unknown | cag+    | s1-m1 | i1-d1 | babA2+   | short  | 917+918  | only iceA2 | PZ1 only |
| SA302A  | h360 | CBOF01 | Africa            | hpEurope  | unknown | cag-neg | ?-?   | i2-?  | babA2+   | short  | only 918 | iceA1+A2   | PZ1 only |
| SA302C  | h361 | CBNA01 | Africa            | hpEurope  | unknown | cag-neg | ?-?   | i2-?  | babA2+   | long   | 917+918  | iceA1+A2   | PZ1 only |
| SA303C  | h362 | CBMW01 | Africa            | hpAfrica2 | unknown | cag-neg | s2-m2 | i2-d2 | no babA2 | absent | only 918 | iceA1 only | PZ1+PZ2  |
| SA30A   | h363 | CBPQ01 | Africa            | hpAfrica1 | unknown | cag+    | s1-m1 | i1-d1 | no babA2 | short  | 917+918  | iceA1 only | PZ1+PZ2  |
| SA30C   | h364 | CBQB01 | Africa            | hpAfrica1 | unknown | cag+    | s1-m1 | i1-d1 | no babA2 | short  | 917+918  | iceA1 only | PZ1+PZ2  |
| SA31C   | h365 | CBPM01 | Africa            | hpAfrica1 | unknown | cag+    | s1-m1 | i1-d1 | no babA2 | short  | 917+918  | iceA1 only | PZ1 only |
| SA34A   | h366 | CBPI01 | Africa            | hpAfrica2 | unknown | cag-neg | s2-m2 | i2-d2 | no babA2 | long   | 917+918  | neither    | PZ1 only |
| SA34C   | h367 | CBNY01 | Africa            | hpAfrica2 | unknown | cag-neg | s2-?  | i2-?  | no babA2 | absent | neither  | iceA1 only | PZ1 only |
| SA35A   | h368 | CBNE01 | Africa            | hpAfrica1 | unknown | cag+    | s1-m1 | i1-d1 | no babA2 | short  | 917+918  | iceA1 only | PZ1 only |
| SA36C   | h369 | CBQI01 | Africa            | hpAfrica2 | unknown | cag-neg | ?-?   | i2-?  | no babA2 | short  | 917+918  | iceA1 only | PZ1 only |
| SA37A   | h370 | CBOO01 | Africa            | hpEurope  | unknown | cag-neg | s2-?  | i2-?  | no babA2 | absent | only 918 | iceA1 only | neither  |
| SA37C   | h371 | CBOP01 | Africa            | hpEurope  | unknown | cag-neg | s2-?  | i2-?  | no babA2 | absent | only 918 | iceA1 only | neither  |
| SA40A   | h372 | CBNN01 | Africa            | hpAfrica2 | unknown | cag-neg | s2-m2 | i2-d2 | no babA2 | long   | 917+918  | iceA1 only | PZ1+PZ2  |
| SA40C   | h373 | CBPN01 | Africa            | hpAfrica2 | unknown | cag-neg | s2-m2 | i2-d2 | no babA2 | absent | neither  | iceA1 only | PZ1 only |
| SA45A   | h374 | CBNB01 | Africa            | hpAfrica1 | unknown | cag+    | s1-m1 | i1-d1 | no babA2 | short  | 917+918  | iceA1 only | PZ1+PZ2  |
| SA45C   | h375 | CBPR01 | Africa            | hpAfrica1 | unknown | cag+    | s1-m1 | i1-d1 | no babA2 | short  | 917+918  | iceA1 only | PZ1+PZ2  |
| SA46C   | h376 | CBOD01 | Africa            | hpAfrica1 | unknown | cag+    | s1-m1 | i1-d1 | babA2+   | short  | 917+918  | iceA1 only | PZ1 only |
| SA47A   | h377 | CBOT01 | Africa            | hpAfrica2 | unknown | cag-neg | s2-m2 | i2-d2 | no babA2 | long   | 917+918  | only iceA2 | PZ1+PZ2  |
| SA47C   | h378 | CBPB01 | Africa            | hpAfrica2 | unknown | cag-neg | s2-m2 | i2-d2 | no babA2 | long   | 917+918  | only iceA2 | PZ1+PZ2  |
| Sahul64 | h379 | ALWV01 | (Other) Australia | hpSahul   | unknown | cag-neg | ?-?   | ?-?   | no babA2 | long   | only 918 | iceA1+A2   | PZ1 only |

**Table S3.** Primers used for in silico PCR genotyping of *H. pylori* virulence markers.

| Marker  | Forward Primer (5' to 3')   | Reverse Primer (5' to 3')  | Size (nt) | Source |
|---------|-----------------------------|----------------------------|-----------|--------|
| cagA    | AATGCTAAATTAGACAACCTTGAGCGA | AGAATAATCAACAAACATCACGCCAT | 298       | (7)    |
| cagC    | ATGAAATTTTTTACAAGAAT        | TTAGCTAGCTCCTCCACCCT       | 328       | (8)    |
| cagE    | GCGATTGTTATTGTGCTTGTAG      | GAAGTGGTTAAAAATCAATGCCCC   | 329       | (9)    |
| cagG    | GCCATGTTAACACCCCTAG         | TTAATGCGCTAGAATAGTGC       | 497       | (10)   |
| cagM    | CAAATACAAAAAAGAAAAAGAGGC    | ATTTTTCAACAAGTTAGAAAAAGCC  | 587       | (10)   |
| cagN    | GTCGCTCTTTATTCTTTAGT        | CTATTTTTTCCATGAGCGA        | 890       | (8)    |
| cagT    | TCTAAAAAGATTACGCTCATAGGCG   | CTTTGGCTTGCGATGTTCAAGTTGCC | 490       | (10)   |
| vacAs1  | ATGGAAATACAACAAACACAC       | CTGCTTGAATGCGCCAAAC        | 259       | (11)   |
| vacAs2  | ATGGAAATACAACAAACACAC       | CTGCTTGAATGCGCCAAAC        | 286       | (11)   |
| vacAm1  | CAATCTGTCCAATCAAGCGAG       | GCGTCTAAATAATTCCAAGG       | 570       | (12)   |
| vacAm2  | CAATCTGTCCAATCAAGCGAG       | GCGTCTAAATAATTCCAAGG       | 645       | (12)   |
| vacAi1  | GTTGGGATTGGGGGAATGCCG       | TTAATTTAACGCTGTTTGAAG      | 426       | (13)   |
| vacAi2  | GTTGGGATTGGGGGAATGCCG       | GATCAACGCTCTGATTTGA        | 432       | (13)   |
| vacAd1  | ACTAATATTGGCACACTGGATTTG    | CTCGCTTGATTGGACAGATTG      | 367       | (14)   |
| vacAd2  | ACTAATATTGGCACACTGGATTTG    | CTCGCTTGATTGGACAGATTG      | 298       | (14)   |
| babA2   | AATCCAAAAAGGAGAAAAAGTATGAAA | TGTTAGTGATTTTCGGTGTAGGACA  | 832       | (15)   |
| dupAL   | ATGTTTCTTGTTTTAGAGGG        | TTATACATATTGAATATTCTCGC    | 2499      | (16)   |
| dupAS   | GGTTTCTACTGACAGAGCGC        | CGTATTTAGTCAGTAAGTTGGCG    | 468       | (16)   |
| dupA    | TAAGCGTGATCAATATGGATT       | GGAACGCCGCATTCTATTA        | 350       | (7)    |
| iceA1   | GTGTTTTTAACCAAAGTATC        | CTATAGCCASTYTCTTTGCA       | 247       | (17)   |
| iceA2   | GTTGGGTATATCACAATTTAT       | TTCCCTATTTTCTAGTAGGT       | 229       | (17)   |
| jhp0917 | TGGTTTCTACTGACAGAGCGC       | AACACGCTGACAGGACAATCTCCC   | 307       | (7)    |
| jhp0918 | AAGCTGAAGCGTTTGTAACG        | CCTATATCGCTAACGCGCTCG      | 276       | (7)    |
| jhp940  | GAAATGTCCTATACCAATGG        | CCTAAGTAGTGCATCAAGG        | 591       | (10)   |
| jhp940  | AGCACAAGATACATGGACCAACA     | TCATCTGCGTTGTCATGGGA       | 473       | (10)   |
| jhp945  | TGCAATAGGCAGTGGTATTGATAC    | AGTAGTATTGCGTTTGCTTGATG    | 450       | (10)   |
| jhp945  | ACTCCAGCCAGTATTGTAAA        | TTCTTGCGAGTTAGGATTGG       | 174       | (10)   |
| jhp947  | CAAGATAGAGCGTTTAGTCA        | TGCATAGCTTTGCATTTGCA       | 348       | (10)   |
| jhp947  | GATAATCCTACGCAGAACG         | GCTAAAGTCATTTGGCTGTC       | 611       | (10)   |
| jhp949  | CAAGATICTTTAGTTGTGCA        | CAGCATTTAGCAAGTTAGCAG      | 358       | (10)   |
| jhp949  | ATAGGAGTGGGTGCTTACTT        | AGCAACAACAAAGGCATGTA       | 788       | (10)   |
| jhp926  | CAGGTTTGAACACCTTTTGA        | CTTAAGCAAGAACCACCACA       | 550       | (10)   |
| jhp926  | ACCTTTCAATACCGCTAGAAG       | GATGAGCAAATCAATGGCATG      | 994       | (10)   |

**Table S4.** Presence / absence analysis of genes belonging to the *H. pylori* *cag* pathogenicity island.

| Isolate name | number <sup>a</sup> | <i>cag</i> by PCR <sup>b</sup> | <i>cag</i> PAI genes <sup>c</sup> |   |   |   |   |   |   |   |   |   |   |   |   |   |   |   |   |   |   |   | Classification <sup>d</sup> |   |         |
|--------------|---------------------|--------------------------------|-----------------------------------|---|---|---|---|---|---|---|---|---|---|---|---|---|---|---|---|---|---|---|-----------------------------|---|---------|
|              |                     |                                | 1                                 | 3 | 4 | β | α | Z | Y | X | W | V | U | T | M | N | L | I | H | G | F | E |                             | D | C       |
| 2017         | <b>h001</b>         | cag+                           |                                   |   |   |   |   |   |   |   |   |   |   |   |   |   |   |   |   |   |   |   |                             |   | cag+    |
| 2018         | <b>h002</b>         | cag+                           |                                   |   |   |   |   |   |   |   |   |   |   |   |   |   |   |   |   |   |   |   |                             |   | cag+    |
| 26695        | <b>h003</b>         | cag+                           |                                   |   |   |   |   |   |   |   |   |   |   |   |   |   |   |   |   |   |   |   |                             |   | cag+    |
| 35A          | <b>h004</b>         | cag+                           |                                   |   |   |   |   |   |   |   |   |   |   |   |   |   |   |   |   |   |   |   |                             |   | cag+    |
| 51           | <b>h005</b>         | cag+                           |                                   |   |   |   |   |   |   |   |   |   |   |   |   |   |   |   |   |   |   |   |                             |   | cag+    |
| 52           | <b>h006</b>         | cag+                           |                                   |   |   |   |   |   |   |   |   |   |   |   |   |   |   |   |   |   |   |   |                             |   | cag+    |
| 83           | <b>h007</b>         | cag+                           |                                   |   |   |   |   |   |   |   |   |   |   |   |   |   |   |   |   |   |   |   |                             |   | cag+    |
| 8A3          | h008                | cag-neg                        |                                   |   |   |   |   |   |   |   |   |   |   |   |   |   |   |   |   |   |   |   |                             |   | cag-neg |
| 908          | <b>h009</b>         | cag+                           |                                   |   |   |   |   |   |   |   |   |   |   |   |   |   |   |   |   |   |   |   |                             |   | cag+    |
| 98-10        | h010                | cag+                           |                                   |   |   |   |   |   |   |   |   |   |   |   |   |   |   |   |   |   |   |   |                             |   | cag+    |
| A45          | h011                | cag-neg                        |                                   |   |   |   |   |   |   |   |   |   |   |   |   |   |   |   |   |   |   |   |                             |   | cag-neg |
| Aklavik117   | <b>h012</b>         | cag-neg                        |                                   |   |   |   |   |   |   |   |   |   |   |   |   |   |   |   |   |   |   |   |                             |   | cag-neg |
| Aklavik86    | <b>h013</b>         | cag-neg                        |                                   |   |   |   |   |   |   |   |   |   |   |   |   |   |   |   |   |   |   |   |                             |   | cag-neg |
| B128         | h014                | cag+                           |                                   |   |   |   |   |   |   |   |   |   |   |   |   |   |   |   |   |   |   |   |                             |   | cag+    |
| B38          | <b>h015</b>         | cag-neg                        |                                   |   |   |   |   |   |   |   |   |   |   |   |   |   |   |   |   |   |   |   |                             |   | cag-neg |
| B45          | h016                | cag+                           |                                   |   |   |   |   |   |   |   |   |   |   |   |   |   |   |   |   |   |   |   |                             |   | cag-neg |
| B8           | <b>h017</b>         | cag+                           |                                   |   |   |   |   |   |   |   |   |   |   |   |   |   |   |   |   |   |   |   |                             |   | cag+    |
| BCS100H1     | h018                | cag-neg                        |                                   |   |   |   |   |   |   |   |   |   |   |   |   |   |   |   |   |   |   |   |                             |   | cag-neg |
| BM012A       | <b>h019</b>         | cag+                           |                                   |   |   |   |   |   |   |   |   |   |   |   |   |   |   |   |   |   |   |   |                             |   | cag+    |
| BM012S       | <b>h020</b>         | cag+                           |                                   |   |   |   |   |   |   |   |   |   |   |   |   |   |   |   |   |   |   |   |                             |   | cag+    |
| CCHI_33      | <b>h021</b>         | cag+                           |                                   |   |   |   |   |   |   |   |   |   |   |   |   |   |   |   |   |   |   |   |                             |   | cag+    |
| CG-IMSS-2012 | h022                | cag+                           |                                   |   |   |   |   |   |   |   |   |   |   |   |   |   |   |   |   |   |   |   |                             |   | cag+    |
| CPY1124      | h023                | cag+                           |                                   |   |   |   |   |   |   |   |   |   |   |   |   |   |   |   |   |   |   |   |                             |   | cag+    |
| CPY1313      | h024                | cag+                           |                                   |   |   |   |   |   |   |   |   |   |   |   |   |   |   |   |   |   |   |   |                             |   | cag+    |
| CPY1662      | h025                | cag+                           |                                   |   |   |   |   |   |   |   |   |   |   |   |   |   |   |   |   |   |   |   |                             |   | cag+    |
| CPY1962      | h026                | cag+                           |                                   |   |   |   |   |   |   |   |   |   |   |   |   |   |   |   |   |   |   |   |                             |   | cag+    |
| CPY3281      | h027                | cag+                           |                                   |   |   |   |   |   |   |   |   |   |   |   |   |   |   |   |   |   |   |   |                             |   | cag+    |
| CPY6081      | h028                | cag+                           |                                   |   |   |   |   |   |   |   |   |   |   |   |   |   |   |   |   |   |   |   |                             |   | cag-neg |
| CPY6261      | h029                | cag+                           |                                   |   |   |   |   |   |   |   |   |   |   |   |   |   |   |   |   |   |   |   |                             |   | cag+    |
| CPY6271      | h030                | cag+                           |                                   |   |   |   |   |   |   |   |   |   |   |   |   |   |   |   |   |   |   |   |                             |   | cag+    |
| CPY6311      | h031                | cag+                           |                                   |   |   |   |   |   |   |   |   |   |   |   |   |   |   |   |   |   |   |   |                             |   | cag+    |
| Cuz20        | <b>h032</b>         | cag+                           |                                   |   |   |   |   |   |   |   |   |   |   |   |   |   |   |   |   |   |   |   |                             |   | cag+    |
| E48          | h033                | cag+                           |                                   |   |   |   |   |   |   |   |   |   |   |   |   |   |   |   |   |   |   |   |                             |   | cag+    |

| Strain    | h                    | Genotype | h | Genotype |
|-----------|----------------------|----------|---|----------|
| ELS37     | <a href="#">h034</a> | cag+     |   | cag+     |
| F16       | <a href="#">h035</a> | cag+     |   | cag+     |
| F30       | <a href="#">h036</a> | cag+     |   | cag+     |
| F32       | <a href="#">h037</a> | cag+     |   | cag+     |
| F57       | <a href="#">h038</a> | cag+     |   | cag+     |
| FD423     | <a href="#">h039</a> | cag+     |   | cag+     |
| FD430     | h040                 | cag+     |   | cag+     |
| FD506     | h041                 | cag+     |   | cag+     |
| FD535     | h042                 | cag+     |   | cag+     |
| FD568     | h043                 | cag+     |   | cag+     |
| FD577     | h044                 | cag+     |   | cag+     |
| FD662     | h045                 | cag+     |   | cag+     |
| FD703     | h046                 | cag+     |   | cag+     |
| FD719     | h047                 | cag+     |   | cag+     |
| G27       | <a href="#">h048</a> | cag+     |   | cag+     |
| GAM100Ai  | h049                 | cag+     |   | cag+     |
| GAM101Biv | h050                 | cag-neg  |   | cag-neg  |
| GAM103Bi  | <a href="#">h051</a> | cag+     |   | cag+     |
| GAM105Ai  | h052                 | cag+     |   | cag+     |
| GAM112Ai  | h053                 | cag+     |   | cag+     |
| GAM114Ai  | h054                 | cag+     |   | cag+     |
| GAM115Ai  | h055                 | cag+     |   | cag+     |
| GAM117Ai  | h056                 | cag+     |   | cag+     |
| GAM118Bi  | h057                 | cag+     |   | cag+     |
| GAM119Bi  | h058                 | cag+     |   | cag+     |
| GAM120Ai  | h059                 | cag+     |   | cag+     |
| GAM121Aii | h060                 | cag+     |   | cag+     |
| GAM201Ai  | h061                 | cag-neg  |   | cag-neg  |
| GAM210Bi  | h062                 | cag+     |   | cag+     |
| GAM231Ai  | h063                 | cag-neg  |   | cag-neg  |
| GAM239Bi  | h064                 | cag-neg  |   | cag-neg  |
| GAM244Ai  | h065                 | cag-neg  |   | cag-neg  |
| GAM245Ai  | h066                 | cag+     |   | cag+     |
| GAM246Ai  | h067                 | cag+     |   | cag+     |
| GAM249T   | h068                 | cag+     |   | cag+     |
| GAM250AFi | h069                 | cag+     |   | cag+     |
| GAM250T   | h070                 | cag+     |   | cag+     |
| GAM252Bi  | h071                 | cag+     |   | cag+     |
| GAM252T   | h072                 | cag+     |   | cag+     |
| GAM254Ai  | h073                 | cag+     |   | cag+     |
| GAM260ASi | h074                 | cag+     |   | cag+     |
| GAM260Bi  | h075                 | cag+     |   | cag+     |

|              |             |         |  |         |
|--------------|-------------|---------|--|---------|
| GAM260BSi    | <b>h076</b> | cag-neg |  | cag-neg |
| GAM263BFi    | h077        | cag+    |  | cag+    |
| GAM264Ai     | h078        | cag-neg |  | cag-neg |
| GAM265BSii   | h079        | cag+    |  | cag+    |
| GAM268Bii    | h080        | cag+    |  | cag+    |
| GAM270ASi    | h081        | cag+    |  | cag+    |
| GAM42Ai      | h082        | cag+    |  | cag+    |
| GAM71Ai      | h083        | cag-neg |  | cag-neg |
| GAM80Ai      | h084        | cag+    |  | cag+    |
| GAM83Bi      | h085        | cag-neg |  | cag-neg |
| GAM83T       | h086        | cag-neg |  | cag-neg |
| GAM93Bi      | h087        | cag+    |  | cag+    |
| GAM96Ai      | h088        | cag-neg |  | cag-neg |
| Gambia9424   | <b>h089</b> | cag+    |  | cag+    |
| GAMchJs106B  | h090        | cag-neg |  | cag-neg |
| GAMchJs114i  | h091        | cag-neg |  | cag-neg |
| GAMchJs117Ai | h092        | cag-neg |  | cag-neg |
| GAMchJs124i  | h093        | cag-neg |  | cag-neg |
| GAMchJs136i  | h094        | cag+    |  | cag+    |
| GC26         | h095        | cag+    |  | cag+    |
| H13-1        | h096        | cag+    |  | cag+    |
| HLJHP193     | h097        | cag+    |  | cag+    |
| HLJHP253     | h098        | cag+    |  | cag+    |
| HLJHP256     | h099        | cag+    |  | cag+    |
| HLJHP271     | h100        | cag+    |  | cag+    |
| Hp_A-11      | h101        | cag+    |  | cag+    |
| Hp_A-14      | h102        | cag-neg |  | cag-neg |
| Hp_A-16      | <b>h103</b> | cag+    |  | cag+    |
| Hp_A-17      | h104        | cag-neg |  | cag-neg |
| Hp_A-20      | h105        | cag+    |  | cag+    |
| Hp_A-26      | h106        | cag-neg |  | cag-neg |
| Hp_A-27      | h107        | cag+    |  | cag+    |
| Hp_A-4       | h108        | cag+    |  | cag+    |
| Hp_A-5       | h109        | cag+    |  | cag+    |
| Hp_A-6       | h110        | cag+    |  | cag+    |
| Hp_A-8       | h111        | cag+    |  | cag+    |
| Hp_A-9       | h112        | cag+    |  | cag+    |
| Hp_H-1       | h113        | cag+    |  | cag+    |
| Hp_H-10      | h114        | cag+    |  | cag-neg |
| Hp_H-11      | h115        | cag+    |  | cag+    |
| Hp_H-16      | h116        | cag+    |  | cag+    |
| Hp_H-18      | h117        | cag+    |  | cag+    |

| Strain   | h    | Genotype | Phenotype |
|----------|------|----------|-----------|
| Hp_H-19  | h118 | cag+     | cag+      |
| Hp_H-21  | h119 | cag-neg  | cag-neg   |
| Hp_H-23  | h120 | cag+     | cag+      |
| Hp_H-24  | h121 | cag+     | cag-neg   |
| Hp_H-24b | h122 | cag+     | cag+      |
| Hp_H-24c | h123 | cag+     | cag-neg   |
| Hp_H-27  | h124 | cag-neg  | cag-neg   |
| Hp_H-28  | h125 | cag+     | cag+      |
| Hp_H-29  | h126 | cag+     | cag+      |
| Hp_H-3   | h127 | cag+     | cag+      |
| Hp_H-30  | h128 | cag+     | cag-neg   |
| Hp_H-34  | h129 | cag-neg  | cag-neg   |
| Hp_H-36  | h130 | cag+     | cag+      |
| Hp_H-4   | h131 | cag+     | cag+      |
| Hp_H-41  | h132 | cag+     | cag+      |
| Hp_H-42  | h133 | cag+     | cag-neg   |
| Hp_H-43  | h134 | cag-neg  | cag-neg   |
| Hp_H-44  | h135 | cag+     | cag+      |
| Hp_H-45  | h136 | cag+     | cag+      |
| Hp_H-5b  | h137 | cag+     | cag+      |
| Hp_H-6   | h138 | cag+     | cag+      |
| Hp_H-9   | h139 | cag+     | cag+      |
| Hp_M1    | h140 | cag+     | cag+      |
| Hp_M2    | h141 | cag+     | cag+      |
| Hp_M3    | h142 | cag+     | cag+      |
| Hp_M4    | h143 | cag+     | cag+      |
| Hp_M5    | h144 | cag+     | cag+      |
| Hp_M6    | h145 | cag+     | cag+      |
| Hp_M9    | h146 | cag+     | cag+      |
| Hp_P-1   | h147 | cag+     | cag+      |
| Hp_P-11  | h148 | cag+     | cag+      |
| Hp_P-11b | h149 | cag+     | cag+      |
| Hp_P-13  | h150 | cag+     | cag+      |
| Hp_P-13b | h151 | cag+     | cag+      |
| Hp_P-15  | h152 | cag-neg  | cag-neg   |
| Hp_P-15b | h153 | cag-neg  | cag-neg   |
| Hp_P-16  | h154 | cag-neg  | cag-neg   |
| Hp_P-1b  | h155 | cag+     | cag+      |
| Hp_P-2   | h156 | cag+     | cag+      |
| Hp_P-23  | h157 | cag-neg  | cag-neg   |
| Hp_P-25  | h158 | cag+     | cag-neg   |
| Hp_P-25c | h159 | cag+     | cag-neg   |



| Strain       | Accession   | CagA status | HPA serotype |
|--------------|-------------|-------------|--------------|
| Hp_P-25d     | h160        | cag+        | cag-neg      |
| Hp_P-26      | h161        | cag+        | cag+         |
| Hp_P-28b     | h162        | cag-neg     | cag-neg      |
| Hp_P-2b      | h163        | cag+        | cag+         |
| Hp_P-3       | h164        | cag+        | cag+         |
| Hp_P-30      | h165        | cag-neg     | cag-neg      |
| Hp_P-3b      | h166        | cag+        | cag+         |
| Hp_P-4       | h167        | cag+        | cag+         |
| Hp_P-41      | h168        | cag+        | cag+         |
| Hp_P-4c      | h169        | cag+        | cag+         |
| Hp_P-4d      | h170        | cag+        | cag+         |
| Hp_P-62      | h171        | cag+        | cag+         |
| Hp_P-74      | h172        | cag-neg     | cag-neg      |
| Hp_P-8       | h173        | cag-neg     | cag-neg      |
| Hp_P-8b      | h174        | cag-neg     | cag-neg      |
| HP116Bi      | <b>h175</b> | cag+        | cag+         |
| HP250AFii    | h176        | cag+        | cag+         |
| HP250AFiii   | h177        | cag+        | cag+         |
| HP250AFiv    | h178        | cag+        | cag+         |
| HP250ASi     | h179        | cag+        | cag+         |
| HP250ASii    | h180        | cag+        | cag+         |
| HP250Bfi     | h181        | cag+        | cag+         |
| HP250BFii    | h182        | cag+        | cag+         |
| HP250BFiii   | h183        | cag+        | cag+         |
| HP250BFiv    | h184        | cag+        | cag+         |
| HP250BSi     | h185        | cag+        | cag+         |
| HP260AFi     | h186        | cag+        | cag+         |
| HP260AFii    | h187        | cag+        | cag+         |
| HP260ASii    | h188        | cag+        | cag+         |
| HP260BFii    | h189        | cag-neg     | cag-neg      |
| HP260Bi      | h190        | cag+        | cag+         |
| HP87hu       | h191        | cag+        | cag+         |
| HP87P7       | h192        | cag+        | cag+         |
| HP87P7tIpDRI | h193        | cag+        | cag+         |
| HP87tIpD     | h194        | cag+        | cag+         |
| HPAG1        | <b>h195</b> | cag+        | cag-neg      |
| HPARG63      | h196        | cag+        | cag+         |
| HPARG8G      | h197        | cag+        | cag+         |
| HUP-B14      | <b>h200</b> | cag+        | cag+         |
| India7       | <b>h201</b> | cag+        | cag+         |
| J99          | <b>h202</b> | cag+        | cag+         |
| Lithuania75  | <b>h203</b> | cag+        | cag+         |

[illegible]

|               |             |         |  |  |  |  |         |
|---------------|-------------|---------|--|--|--|--|---------|
| R037c         | h246        | cag-neg |  |  |  |  | cag-neg |
| R038b         | h247        | cag-neg |  |  |  |  | cag-neg |
| R046Wa        | h248        | cag-neg |  |  |  |  | cag-neg |
| R055a         | h249        | cag+    |  |  |  |  | cag+    |
| R056a         | h250        | cag+    |  |  |  |  | cag+    |
| R32b          | h251        | cag+    |  |  |  |  | cag+    |
| Rif1          | h252        | cag+    |  |  |  |  | cag+    |
| Rif2          | h253        | cag+    |  |  |  |  | cag+    |
| Sat464        | <b>h254</b> | cag+    |  |  |  |  | cag-neg |
| Shi112        | <b>h255</b> | cag+    |  |  |  |  | cag+    |
| Shi169        | <b>h256</b> | cag+    |  |  |  |  | cag+    |
| Shi417        | <b>h257</b> | cag-neg |  |  |  |  | cag+    |
| Shi470        | <b>h258</b> | cag-neg |  |  |  |  | cag+    |
| SJM180        | <b>h259</b> | cag+    |  |  |  |  | cag+    |
| SNT49         | <b>h260</b> | cag+    |  |  |  |  | cag+    |
| SouthAfrica20 | <b>h261</b> | cag-neg |  |  |  |  | cag-neg |
| SouthAfrica50 | h262        | cag-neg |  |  |  |  | cag-neg |
| SouthAfrica7  | <b>h263</b> | cag-neg |  |  |  |  | cag-neg |
| UM007         | h264        | cag+    |  |  |  |  | cag+    |
| UM018         | h265        | cag+    |  |  |  |  | cag+    |
| UM023         | h266        | cag+    |  |  |  |  | cag+    |
| UM032         | <b>h267</b> | cag+    |  |  |  |  | cag+    |
| UM034         | h268        | cag+    |  |  |  |  | cag+    |
| UM037         | h269        | cag+    |  |  |  |  | cag+    |
| UM038         | h270        | cag+    |  |  |  |  | cag+    |
| UM045         | h271        | cag+    |  |  |  |  | cag+    |
| UM054         | <b>h272</b> | cag+    |  |  |  |  | cag+    |
| UM065         | h273        | cag+    |  |  |  |  | cag+    |
| UM066         | h274        | cag+    |  |  |  |  | cag+    |
| UM067         | h275        | cag+    |  |  |  |  | cag+    |
| UM077         | h276        | cag+    |  |  |  |  | cag+    |
| UM084         | h277        | cag+    |  |  |  |  | cag+    |
| UM085         | h278        | cag+    |  |  |  |  | cag+    |
| UM111         | h279        | cag+    |  |  |  |  | cag+    |
| UM114         | h280        | cag+    |  |  |  |  | cag+    |
| UM298         | <b>h281</b> | cag+    |  |  |  |  | cag+    |
| UM299         | <b>h282</b> | cag+    |  |  |  |  | cag+    |
| UMB_G1        | h283        | cag-neg |  |  |  |  | cag-neg |
| v225          | <b>h284</b> | cag+    |  |  |  |  | cag-neg |
| wls-5-12      | h285        | cag+    |  |  |  |  | cag+    |
| wls-5-3       | h286        | cag+    |  |  |  |  | cag+    |
| X47-2AL       | h287        | cag-neg |  |  |  |  | cag-neg |

[illegible]

| SA     | h    | cag+    | cag-    |
|--------|------|---------|---------|
| SA210C | h330 | cag+    | cag+    |
| SA213A | h331 | cag-neg | cag-neg |
| SA214A | h332 | cag-neg | cag-neg |
| SA214C | h333 | cag-neg | cag-neg |
| SA215C | h334 | cag+    | cag+    |
| SA216C | h335 | cag+    | cag-neg |
| SA220A | h336 | cag+    | cag+    |
| SA220C | h337 | cag+    | cag+    |
| SA221A | h338 | cag-neg | cag-neg |
| SA221C | h339 | cag-neg | cag-neg |
| SA222A | h340 | cag+    | cag+    |
| SA222C | h341 | cag-neg | cag-neg |
| SA224A | h342 | cag+    | cag+    |
| SA224C | h343 | cag+    | cag+    |
| SA226A | h344 | cag+    | cag+    |
| SA227A | h345 | cag+    | cag+    |
| SA233A | h346 | cag-neg | cag-neg |
| SA233C | h347 | cag-neg | cag-neg |
| SA251A | h348 | cag-neg | cag-neg |
| SA251C | h349 | cag-neg | cag-neg |
| SA252A | h350 | cag+    | cag+    |
| SA252C | h351 | cag+    | cag+    |
| SA253A | h352 | cag-neg | cag-neg |
| SA253C | h353 | cag-neg | cag-neg |
| SA29A  | h354 | cag-neg | cag-neg |
| SA29C  | h355 | cag+    | cag+    |
| SA300A | h356 | cag+    | cag+    |
| SA300C | h357 | cag+    | cag+    |
| SA301A | h358 | cag+    | cag+    |
| SA301C | h359 | cag+    | cag+    |
| SA302A | h360 | cag-neg | cag-neg |
| SA302C | h361 | cag-neg | cag-neg |
| SA303C | h362 | cag-neg | cag-neg |
| SA30A  | h363 | cag+    | cag+    |
| SA30C  | h364 | cag+    | cag+    |
| SA31C  | h365 | cag+    | cag+    |
| SA34A  | h366 | cag-neg | cag-neg |
| SA34C  | h367 | cag-neg | cag-neg |
| SA35A  | h368 | cag+    | cag+    |
| SA36C  | h369 | cag-neg | cag-neg |
| SA37A  | h370 | cag-neg | cag-neg |
| SA37C  | h371 | cag-neg | cag-neg |

| Strain  | Cell Line | Genotype | Genomic Profile | Genotype |
|---------|-----------|----------|-----------------|----------|
| SA40A   | h372      | cag-neg  |                 | cag-neg  |
| SA40C   | h373      | cag-neg  |                 | cag-neg  |
| SA45A   | h374      | cag+     |                 | cag+     |
| SA45C   | h375      | cag+     |                 | cag+     |
| SA46C   | h376      | cag+     |                 | cag+     |
| SA47A   | h377      | cag-neg  |                 | cag-neg  |
| SA47C   | h378      | cag-neg  |                 | cag-neg  |
| Sahul64 | h379      | cag-neg  |                 | cag-neg  |

**Table S5.** Prediction of antibiotic resistance encoded *h. pylori* genomes

<sup>a</sup> Genome number labeled **blue** are included in Figure 2

<sup>b</sup> based on continent/country of isolation

<sup>c</sup> resistance to clarithromycin is based on the presence of either A2142, A2143 or T2182 mutations in the 23S rRNA gene. WT = wildtype sequence, T2182C is annotated as "low level?"

<sup>d</sup> resistance to metronidazole is based on inactivation/truncation of *rdxA* (*hp0954*) and *frxA* (*hp0642*) genes. WT = wildtype (*rdxA* + *frxA* +)

<sup>e</sup> resistance to fluoroquinolone is based on the presence of either N87 or D91 mutations in *gyrA* gene. WT = wildtype sequence. Only N87K, N87I, D91N, D91G and D91Y are scored as resistant

<sup>f</sup> resistance to tetracycline is based on the presence of AGA926-928 mutations in the 16S rRNA gene. WT = wildtype sequence. AGC, TGC and TGA are scored as low level resistance, AGT and GGA as susceptible

| Isolate      | number <sup>a</sup> | geography <sup>b</sup> | MLST       | Clarithromycin resistance (23S rRNA gene) <sup>c</sup> |          |         | Metronidazole resistance( <i>rdxA</i> // <i>frxA</i> ) <sup>d</sup> |               |               | Fluoroquinolone resistance( <i>gyrA</i> ) <sup>e</sup> |                 |      | Tetracycline resistance (16S rRNA gene) <sup>f</sup> |              |            |
|--------------|---------------------|------------------------|------------|--------------------------------------------------------|----------|---------|---------------------------------------------------------------------|---------------|---------------|--------------------------------------------------------|-----------------|------|------------------------------------------------------|--------------|------------|
|              |                     |                        |            | clarithromycin                                         | A2142G/C | A2143G  | T2182C                                                              | metronidazole | <i>rdxA</i>   | <i>frxA</i>                                            | fluoroquinolone | N87  | D91                                                  | tetracycline | AGA926-928 |
| 2017         | <b>h001</b>         | Africa                 | hpAfrica1  | susceptible                                            | WT       | WT      | WT                                                                  | resistant     | <i>rdxA</i> - | WT                                                     | susceptible     | N87T | WT                                                   | susceptible  | WT         |
| 2018         | <b>h002</b>         | Africa                 | hpAfrica1  | susceptible                                            | WT       | WT      | WT                                                                  | resistant     | <i>rdxA</i> - | WT                                                     | susceptible     | N87T | WT                                                   | susceptible  | WT         |
| 26695        | <b>h003</b>         | Europe                 | hpEurope   | susceptible                                            | WT       | WT      | WT                                                                  | susceptible   | WT            | WT                                                     | susceptible     | WT   | WT                                                   | susceptible  | WT         |
| 35A          | <b>h004</b>         | North America          | hspEAsia   | susceptible                                            | WT       | WT      | WT                                                                  | susceptible   | WT            | WT                                                     | susceptible     | WT   | WT                                                   | susceptible  | WT         |
| 51           | <b>h005</b>         | East Asia              | hspEAsia   | resistant                                              | WT       | A2143G  | T2182C                                                              | susceptible   | WT            | WT                                                     | susceptible     | WT   | WT                                                   | susceptible  | WT         |
| 52           | <b>h006</b>         | East Asia              | hspEAsia   | low level?                                             | WT       | WT      | T2182C                                                              | susceptible   | WT            | WT                                                     | susceptible     | WT   | WT                                                   | susceptible  | WT         |
| 83           | <b>h007</b>         | North America          | hspEAsia   | low level?                                             | WT       | WT      | T2182C                                                              | susceptible   | WT            | WT                                                     | susceptible     | WT   | WT                                                   | susceptible  | WT         |
| 8A3          | h008                | North America          | hspEAsia   | low level?                                             | WT       | WT      | T2182C                                                              | susceptible   | WT            | WT                                                     | susceptible     | WT   | WT                                                   | susceptible  | WT         |
| 908          | <b>h009</b>         | Africa                 | hpAfrica1  | susceptible                                            | WT       | WT      | WT                                                                  | resistant     | <i>rdxA</i> - | <i>frxA</i> -                                          | susceptible     | N87T | WT                                                   | susceptible  | WT         |
| 98-10        | h010                | East Asia              | hspEAsia   | low level?                                             | WT       | WT      | T2182C                                                              | susceptible   | WT            | WT                                                     | susceptible     | WT   | WT                                                   | susceptible  | WT         |
| A45          | h011                | Europe                 | hpEurope   | susceptible                                            | WT       | WT      | WT                                                                  | resistant     | WT            | <i>frxA</i> -                                          | susceptible     | WT   | WT                                                   | susceptible  | WT         |
| Aklavik117   | <b>h012</b>         | North America          | hspAmerInd | low level?                                             | WT       | WT      | T2182C                                                              | susceptible   | WT            | WT                                                     | susceptible     | WT   | WT                                                   | susceptible  | WT         |
| Aklavik86    | <b>h013</b>         | North America          | hspAmerInd | low level?                                             | WT       | WT      | T2182C                                                              | unknown       | WT            | n/a                                                    | susceptible     | WT   | WT                                                   | susceptible  | WT         |
| B128         | h014                | Europe                 | hpEurope   | susceptible                                            | WT       | WT      | WT                                                                  | susceptible   | WT            | WT                                                     | susceptible     | WT   | WT                                                   | susceptible  | WT         |
| B38          | <b>h015</b>         | Europe                 | hpEurope   | susceptible                                            | WT       | WT      | WT                                                                  | susceptible   | WT            | WT                                                     | susceptible     | WT   | WT                                                   | susceptible  | WT         |
| B45          | h016                | Europe                 | hpEurope   | susceptible                                            | WT       | WT      | WT                                                                  | susceptible   | WT            | WT                                                     | susceptible     | WT   | WT                                                   | susceptible  | WT         |
| B8           | <b>h017</b>         | Europe                 | hpEurope   | susceptible                                            | WT       | WT      | WT                                                                  | susceptible   | WT            | WT                                                     | susceptible     | WT   | WT                                                   | susceptible  | WT         |
| BCS100H1     | h018                | North America          | hspEAsia   | low level?                                             | WT       | WT      | T2182C                                                              | susceptible   | WT            | WT                                                     | susceptible     | WT   | WT                                                   | susceptible  | WT         |
| BM012A       | <b>h019</b>         | other (Australia)      | hpEurope   | susceptible                                            | WT       | WT      | WT                                                                  | susceptible   | WT            | WT                                                     | susceptible     | WT   | WT                                                   | susceptible  | WT         |
| BM012S       | <b>h020</b>         | other (Australia)      | hpEurope   | susceptible                                            | WT       | WT      | WT                                                                  | susceptible   | WT            | WT                                                     | susceptible     | WT   | WT                                                   | susceptible  | WT         |
| CCHI_33      | <b>h021</b>         | North America          | hpAfrica1  | resistant                                              | A2142G   | WT      | WT                                                                  | resistant     | WT            | <i>frxA</i> -                                          | susceptible     | N87T | WT                                                   | unknown      | N/A        |
| CG-IMSS-2012 | h022                | South America          | hpEurope   | susceptible                                            | WT       | WT      | WT                                                                  | resistant     | WT            | <i>frxA</i> -                                          | susceptible     | WT   | WT                                                   | susceptible  | GGA        |
| CPY1124      | h023                | East Asia              | hspEAsia   | unknown                                                | unknown  | unknown | unknown                                                             | susceptible   | WT            | WT                                                     | susceptible     | WT   | WT                                                   | susceptible  | WT         |
| CPY1313      | h024                | East Asia              | hspEAsia   | low level?                                             | WT       | WT      | T2182C                                                              | resistant     | WT            | <i>frxA</i> -                                          | susceptible     | WT   | WT                                                   | susceptible  | WT         |
| CPY1662      | h025                | East Asia              | hspEAsia   | low level?                                             | WT       | WT      | T2182C                                                              | susceptible   | WT            | WT                                                     | susceptible     | WT   | WT                                                   | susceptible  | WT         |
| CPY1962      | h026                | East Asia              | hspEAsia   | unknown                                                | unknown  | unknown | unknown                                                             | resistant     | WT            | <i>frxA</i> -                                          | susceptible     | WT   | WT                                                   | susceptible  | WT         |
| CPY3281      | h027                | East Asia              | hspEAsia   | low level?                                             | WT       | WT      | T2182C                                                              | susceptible   | WT            | WT                                                     | susceptible     | WT   | WT                                                   | susceptible  | WT         |
| CPY6081      | h028                | East Asia              | hspEAsia   | low level?                                             | WT       | WT      | T2182C                                                              | susceptible   | WT            | WT                                                     | susceptible     | WT   | WT                                                   | susceptible  | WT         |
| CPY6261      | h029                | East Asia              | hspEAsia   | low level?                                             | WT       | WT      | T2182C                                                              | susceptible   | WT            | WT                                                     | susceptible     | WT   | WT                                                   | susceptible  | WT         |
| CPY6271      | h030                | East Asia              | hspEAsia   | low level?                                             | WT       | WT      | T2182C                                                              | susceptible   | WT            | WT                                                     | susceptible     | WT   | WT                                                   | susceptible  | WT         |
| CPY6311      | h031                | East Asia              | hspEAsia   | unknown                                                | unknown  | unknown | unknown                                                             | resistant     | WT            | <i>frxA</i> -                                          | susceptible     | WT   | WT                                                   | susceptible  | WT         |
| Cuz20        | <b>h032</b>         | South America          | hspAmerInd | low level?                                             | WT       | WT      | T2182C                                                              | susceptible   | WT            | WT                                                     | susceptible     | WT   | WT                                                   | susceptible  | WT         |
| E48          | h033                | other (Russia)         | hspEAsia   | low level?                                             | WT       | WT      | T2182C                                                              | susceptible   | WT            | WT                                                     | susceptible     | WT   | WT                                                   | susceptible  | WT         |
| ELS37        | <b>h034</b>         | South America          | hpEurope   | susceptible                                            | WT       | WT      | WT                                                                  | resistant     | WT            | <i>frxA</i> -                                          | susceptible     | WT   | WT                                                   | susceptible  | WT         |
| F16          | <b>h035</b>         | East Asia              | hspEAsia   | low level?                                             | WT       | WT      | T2182C                                                              | resistant     | WT            | <i>frxA</i> -                                          | susceptible     | WT   | WT                                                   | susceptible  | WT         |
| F30          | <b>h036</b>         | East Asia              | hspEAsia   | low level?                                             | WT       | WT      | T2182C                                                              | resistant     | WT            | <i>frxA</i> -                                          | susceptible     | WT   | WT                                                   | susceptible  | WT         |
| F32          | <b>h037</b>         | East Asia              | hspEAsia   | low level?                                             | WT       | WT      | T2182C                                                              | susceptible   | WT            | WT                                                     | susceptible     | WT   | WT                                                   | susceptible  | WT         |
| F57          | <b>h038</b>         | East Asia              | hspEAsia   | low level?                                             | WT       | WT      | T2182C                                                              | susceptible   | WT            | WT                                                     | susceptible     | WT   | WT                                                   | susceptible  | WT         |
| FD423        | <b>h039</b>         | East Asia              | hpAsia2    | low level?                                             | WT       | WT      | T2182C                                                              | resistant     | n/a           | <i>frxA</i> -                                          | susceptible     | WT   | WT                                                   | susceptible  | WT         |
| FD430        | h040                | East Asia              | hpAsia2    | low level?                                             | WT       | WT      | T2182C                                                              | unknown       | WT            | n/a                                                    | susceptible     | WT   | WT                                                   | susceptible  | WT         |
| FD506        | h041                | East Asia              | hspEAsia   | low level?                                             | WT       | WT      | T2182C                                                              | unknown       | WT            | n/a                                                    | susceptible     | WT   | WT                                                   | susceptible  | WT         |
| FD535        | h042                | East Asia              | hpAsia2    | low level?                                             | WT       | WT      | T2182C                                                              | resistant     | WT            | <i>frxA</i> -                                          | susceptible     | WT   | WT                                                   | susceptible  | WT         |
| FD568        | h043                | East Asia              | hspEAsia   | low level?                                             | WT       | WT      | T2182C                                                              | resistant     | WT            | <i>frxA</i> -                                          | susceptible     | WT   | WT                                                   | susceptible  | WT         |
| FD577        | h044                | East Asia              | hspEAsia   | low level?                                             | WT       | WT      | T2182C                                                              | susceptible   | WT            | WT                                                     | susceptible     | WT   | WT                                                   | susceptible  | WT         |
| FD662        | h045                | East Asia              | hpAsia2    | low level?                                             | WT       | WT      | T2182C                                                              | susceptible   | WT            | WT                                                     | susceptible     | WT   | WT                                                   | susceptible  | WT         |
| FD703        | h046                | East Asia              | hpAsia2    | low level?                                             | WT       | WT      | T2182C                                                              | susceptible   | WT            | WT                                                     | susceptible     | WT   | WT                                                   | susceptible  | WT         |



|              |             |                |           |             |    |        |        |             |       |       |             |      |      |             |     |
|--------------|-------------|----------------|-----------|-------------|----|--------|--------|-------------|-------|-------|-------------|------|------|-------------|-----|
| FD719        | h047        | East Asia      | hpAsia2   | low level?  | WT | WT     | T2182C | unknown     | WT    | n/a   | susceptible | WT   | WT   | susceptible | WT  |
| G27          | <b>h048</b> | Europe         | hpEurope  | susceptible | WT | WT     | WT     | susceptible | WT    | WT    | susceptible | WT   | WT   | susceptible | WT  |
| GAM100Ai     | h049        | Africa         | hpAfrica1 | susceptible | WT | WT     | WT     | resistant   | rdxA- | frxA- | susceptible | WT   | WT   | susceptible | WT  |
| GAM101Biv    | h050        | Africa         | hpAfrica1 | susceptible | WT | WT     | WT     | resistant   | rdxA- | WT    | susceptible | WT   | WT   | susceptible | WT  |
| GAM103Bi     | <b>h051</b> | Africa         | hpAfrica1 | susceptible | WT | WT     | WT     | resistant   | WT    | frxA- | susceptible | N87T | WT   | susceptible | GGA |
| GAM105Ai     | h052        | Africa         | hpAfrica1 | susceptible | WT | WT     | WT     | susceptible | WT    | WT    | susceptible | WT   | WT   | susceptible | WT  |
| GAM112Ai     | h053        | Africa         | hpAfrica1 | susceptible | WT | WT     | WT     | resistant   | rdxA- | frxA- | susceptible | WT   | WT   | susceptible | WT  |
| GAM114Ai     | h054        | Africa         | hpAfrica1 | susceptible | WT | WT     | WT     | resistant   | WT    | frxA- | susceptible | N87T | WT   | susceptible | WT  |
| GAM115Ai     | h055        | Africa         | hpAfrica1 | susceptible | WT | WT     | WT     | resistant   | rdxA- | frxA- | susceptible | WT   | WT   | susceptible | WT  |
| GAM117Ai     | h056        | Africa         | hpAfrica1 | susceptible | WT | WT     | WT     | resistant   | WT    | frxA- | resistant   | N87T | D91N | susceptible | WT  |
| GAM118Bi     | h057        | Africa         | hpAfrica1 | susceptible | WT | WT     | WT     | resistant   | rdxA- | frxA- | susceptible | WT   | WT   | susceptible | WT  |
| GAM119Bi     | h058        | Africa         | hpAfrica1 | susceptible | WT | WT     | WT     | susceptible | WT    | WT    | resistant   | N87I | WT   | susceptible | WT  |
| GAM120Ai     | h059        | Africa         | hpAfrica1 | susceptible | WT | WT     | WT     | resistant   | WT    | frxA- | susceptible | N87T | WT   | susceptible | WT  |
| GAM121Aii    | h060        | Africa         | hpAfrica1 | susceptible | WT | WT     | WT     | resistant   | WT    | frxA- | susceptible | N87T | WT   | susceptible | WT  |
| GAM201Ai     | h061        | Africa         | hpAfrica1 | susceptible | WT | WT     | WT     | resistant   | WT    | frxA- | susceptible | WT   | WT   | susceptible | WT  |
| GAM210Bi     | h062        | Africa         | hpAfrica1 | susceptible | WT | WT     | WT     | resistant   | rdxA- | frxA- | susceptible | N87T | WT   | susceptible | WT  |
| GAM231Ai     | h063        | Africa         | hpAfrica1 | susceptible | WT | WT     | WT     | susceptible | WT    | WT    | susceptible | N87T | WT   | susceptible | WT  |
| GAM239Bi     | h064        | Africa         | hpAfrica1 | susceptible | WT | WT     | WT     | susceptible | WT    | WT    | susceptible | WT   | WT   | susceptible | WT  |
| GAM244Ai     | h065        | Africa         | hpAfrica1 | susceptible | WT | WT     | WT     | resistant   | rdxA- | frxA- | susceptible | N87T | WT   | susceptible | WT  |
| GAM245Ai     | h066        | Africa         | hpAfrica1 | susceptible | WT | WT     | WT     | resistant   | WT    | frxA- | susceptible | N87T | WT   | susceptible | WT  |
| GAM246Ai     | h067        | Africa         | hpAfrica1 | susceptible | WT | WT     | WT     | resistant   | rdxA- | frxA- | susceptible | N87T | WT   | susceptible | WT  |
| GAM249T      | h068        | Africa         | hpAfrica1 | susceptible | WT | WT     | WT     | resistant   | rdxA- | frxA- | resistant   | N87T | D91N | susceptible | WT  |
| GAM250AFi    | h069        | Africa         | hpAfrica1 | susceptible | WT | WT     | WT     | resistant   | WT    | frxA- | susceptible | N87T | WT   | low level   | AGC |
| GAM250T      | h070        | Africa         | hpAfrica1 | susceptible | WT | WT     | WT     | resistant   | WT    | frxA- | susceptible | N87T | WT   | low level   | AGC |
| GAM252Bi     | h071        | Africa         | hpAfrica1 | susceptible | WT | WT     | WT     | resistant   | WT    | frxA- | susceptible | N87T | WT   | low level   | AGC |
| GAM252T      | h072        | Africa         | hpAfrica1 | susceptible | WT | WT     | WT     | resistant   | WT    | frxA- | susceptible | N87T | WT   | low level   | AGC |
| GAM254Ai     | h073        | Africa         | hpAfrica1 | susceptible | WT | WT     | WT     | resistant   | rdxA- | frxA- | susceptible | N87T | WT   | susceptible | WT  |
| GAM260ASi    | h074        | Africa         | hpAfrica1 | susceptible | WT | WT     | WT     | resistant   | WT    | frxA- | susceptible | N87T | WT   | susceptible | WT  |
| GAM260Bi     | h075        | Africa         | hpAfrica1 | susceptible | WT | WT     | WT     | resistant   | WT    | frxA- | susceptible | N87T | WT   | susceptible | WT  |
| GAM260BSi    | <b>h076</b> | Africa         | hpAfrica1 | susceptible | WT | WT     | WT     | resistant   | rdxA- | WT    | susceptible | WT   | WT   | susceptible | WT  |
| GAM263BFi    | h077        | Africa         | hpAfrica1 | susceptible | WT | WT     | WT     | resistant   | rdxA- | frxA- | susceptible | WT   | WT   | susceptible | WT  |
| GAM264Ai     | h078        | Africa         | hpAfrica1 | susceptible | WT | WT     | WT     | resistant   | WT    | frxA- | susceptible | N87T | WT   | susceptible | WT  |
| GAM265BSii   | h079        | Africa         | hpAfrica1 | susceptible | WT | WT     | WT     | resistant   | WT    | frxA- | susceptible | N87T | WT   | susceptible | WT  |
| GAM268Bii    | h080        | Africa         | hpAfrica1 | susceptible | WT | WT     | WT     | resistant   | WT    | frxA- | susceptible | N87T | WT   | susceptible | WT  |
| GAM270ASi    | h081        | Africa         | hpAfrica1 | susceptible | WT | WT     | WT     | resistant   | rdxA- | frxA- | susceptible | N87T | WT   | susceptible | WT  |
| GAM42Ai      | h082        | Africa         | hpAfrica1 | susceptible | WT | WT     | WT     | susceptible | WT    | WT    | susceptible | WT   | WT   | susceptible | WT  |
| GAM71Ai      | h083        | Africa         | hpAfrica1 | susceptible | WT | WT     | WT     | resistant   | rdxA- | frxA- | susceptible | WT   | WT   | susceptible | WT  |
| GAM80Ai      | h084        | Africa         | hpAfrica1 | susceptible | WT | WT     | WT     | susceptible | WT    | WT    | susceptible | WT   | WT   | susceptible | WT  |
| GAM83Bi      | h085        | Africa         | hpAfrica1 | susceptible | WT | WT     | WT     | susceptible | WT    | WT    | resistant   | N87K | WT   | low level   | TGC |
| GAM83T       | h086        | Africa         | hpAfrica1 | susceptible | WT | WT     | WT     | resistant   | WT    | frxA- | resistant   | WT   | D91G | low level   | TGC |
| GAM93Bi      | h087        | Africa         | hpAfrica1 | susceptible | WT | WT     | WT     | resistant   | rdxA- | frxA- | resistant   | N87I | WT   | susceptible | GGA |
| GAM96Ai      | h088        | Africa         | hpAfrica1 | susceptible | WT | WT     | WT     | resistant   | rdxA- | frxA- | susceptible | N87T | WT   | susceptible | WT  |
| Gambia9424   | <b>h089</b> | Africa         | hpAfrica1 | susceptible | WT | WT     | WT     | resistant   | WT    | frxA- | susceptible | WT   | WT   | susceptible | WT  |
| GAMchJs106B  | h090        | Africa         | hpAfrica1 | susceptible | WT | WT     | WT     | resistant   | WT    | frxA- | susceptible | N87T | WT   | susceptible | WT  |
| GAMchJs114i  | h091        | Africa         | hpAfrica1 | susceptible | WT | WT     | WT     | resistant   | rdxA- | frxA- | susceptible | N87T | WT   | susceptible | WT  |
| GAMchJs117Ai | h092        | Africa         | hpAfrica1 | susceptible | WT | WT     | WT     | susceptible | WT    | WT    | susceptible | WT   | WT   | susceptible | WT  |
| GAMchJs124i  | h093        | Africa         | hpAfrica1 | susceptible | WT | WT     | WT     | susceptible | WT    | WT    | susceptible | WT   | WT   | susceptible | WT  |
| GAMchJs136i  | h094        | Africa         | hpAfrica1 | susceptible | WT | WT     | WT     | resistant   | WT    | frxA- | susceptible | N87T | WT   | susceptible | WT  |
| GC26         | h095        | East Asia      | hspEAsia  | low level?  | WT | WT     | T2182C | resistant   | WT    | frxA- | susceptible | WT   | WT   | susceptible | WT  |
| H13-1        | h096        | other (Russia) | hspEAsia  | low level?  | WT | WT     | T2182C | susceptible | WT    | WT    | susceptible | WT   | WT   | susceptible | WT  |
| HUHP193      | h097        | East Asia      | hspEAsia  | resistant   | WT | A2143G | T2182C | resistant   | WT    | frxA- | susceptible | WT   | WT   | susceptible | WT  |
| HUHP253      | h098        | East Asia      | hspEAsia  | low level?  | WT | WT     | T2182C | susceptible | WT    | WT    | resistant   | WT   | D91G | susceptible | WT  |
| HUHP256      | h099        | East Asia      | hspEAsia  | low level?  | WT | WT     | T2182C | resistant   | WT    | frxA- | resistant   | WT   | D91G | susceptible | WT  |
| HUHP271      | h100        | East Asia      | hspEAsia  | low level?  | WT | WT     | T2182C | resistant   | rdxA- | WT    | susceptible | WT   | WT   | unknown     | N/A |
| Hp_A-11      | h101        | North America  | hpEurope  | low level?  | WT | WT     | T2182C | susceptible | WT    | WT    | susceptible | WT   | WT   | susceptible | WT  |
| Hp_A-14      | h102        | North America  | hpEurope  | susceptible | WT | WT     | WT     | susceptible | WT    | WT    | susceptible | WT   | WT   | unknown     | N/A |
| Hp_A-16      | <b>h103</b> | North America  | hpAfrica1 | susceptible | WT | WT     | WT     | susceptible | WT    | WT    | susceptible | N87T | WT   | susceptible | WT  |

|          |      |               |           |             |         |         |         |             |       |       |             |      |    |             |     |
|----------|------|---------------|-----------|-------------|---------|---------|---------|-------------|-------|-------|-------------|------|----|-------------|-----|
| Hp_A-17  | h104 | North America | hpAfrica1 | susceptible | WT      | WT      | WT      | susceptible | WT    | WT    | susceptible | WT   | WT | susceptible | WT  |
| Hp_A-20  | h105 | North America | hpAfrica1 | susceptible | WT      | WT      | WT      | susceptible | WT    | WT    | susceptible | N87T | WT | susceptible | WT  |
| Hp_A-26  | h106 | North America | hpEurope  | susceptible | WT      | WT      | WT      | resistant   | WT    | frxA- | susceptible | WT   | WT | susceptible | WT  |
| Hp_A-27  | h107 | North America | hpEurope  | susceptible | WT      | WT      | WT      | susceptible | WT    | WT    | susceptible | WT   | WT | susceptible | WT  |
| Hp_A-4   | h108 | North America | hpAfrica1 | susceptible | WT      | WT      | WT      | susceptible | WT    | WT    | susceptible | N87T | WT | unknown     | N/A |
| Hp_A-5   | h109 | North America | hpAfrica1 | susceptible | WT      | WT      | WT      | susceptible | WT    | WT    | susceptible | N87T | WT | susceptible | WT  |
| Hp_A-6   | h110 | North America | hpAfrica1 | susceptible | WT      | WT      | WT      | susceptible | WT    | WT    | susceptible | N87T | WT | susceptible | WT  |
| Hp_A-8   | h111 | North America | hpAfrica1 | susceptible | WT      | WT      | WT      | susceptible | WT    | WT    | susceptible | N87T | WT | susceptible | WT  |
| Hp_A-9   | h112 | North America | hpEurope  | low level?  | WT      | WT      | T2182C  | susceptible | WT    | WT    | susceptible | WT   | WT | susceptible | WT  |
| Hp_H-1   | h113 | North America | hpAfrica1 | unknown     | unknown | unknown | unknown | susceptible | WT    | WT    | susceptible | N87T | WT | unknown     | N/A |
| Hp_H-10  | h114 | North America | hpAfrica1 | susceptible | WT      | WT      | WT      | susceptible | WT    | WT    | susceptible | WT   | WT | susceptible | WT  |
| Hp_H-11  | h115 | North America | hpEurope  | low level?  | WT      | WT      | T2182C  | resistant   | WT    | frxA- | susceptible | WT   | WT | susceptible | WT  |
| Hp_H-16  | h116 | North America | hpAfrica1 | susceptible | WT      | WT      | WT      | resistant   | rdxA- | WT    | susceptible | N87T | WT | susceptible | WT  |
| Hp_H-18  | h117 | North America | hpAfrica1 | susceptible | WT      | WT      | WT      | resistant   | WT    | frxA- | susceptible | N87T | WT | susceptible | WT  |
| Hp_H-19  | h118 | North America | hpAfrica1 | susceptible | WT      | WT      | WT      | resistant   | WT    | frxA- | susceptible | N87T | WT | susceptible | WT  |
| Hp_H-21  | h119 | North America | hpAfrica1 | susceptible | WT      | WT      | WT      | susceptible | WT    | WT    | susceptible | N87T | WT | susceptible | WT  |
| Hp_H-23  | h120 | North America | hpAfrica1 | susceptible | WT      | WT      | WT      | resistant   | WT    | frxA- | susceptible | N87T | WT | susceptible | WT  |
| Hp_H-24  | h121 | North America | hpAfrica1 | susceptible | WT      | WT      | WT      | resistant   | WT    | frxA- | susceptible | N87T | WT | low level   | AGC |
| Hp_H-24b | h122 | North America | hpAfrica1 | susceptible | WT      | WT      | WT      | resistant   | WT    | frxA- | susceptible | N87T | WT | low level   | AGC |
| Hp_H-24c | h123 | North America | hpAfrica1 | susceptible | WT      | WT      | WT      | resistant   | WT    | frxA- | susceptible | N87T | WT | low level   | AGC |
| Hp_H-27  | h124 | North America | hpEurope  | susceptible | WT      | WT      | WT      | susceptible | WT    | WT    | susceptible | WT   | WT | susceptible | WT  |
| Hp_H-28  | h125 | North America | hpEurope  | susceptible | WT      | WT      | WT      | susceptible | WT    | WT    | susceptible | WT   | WT | unknown     | N/A |
| Hp_H-29  | h126 | North America | hpAfrica1 | susceptible | WT      | WT      | WT      | susceptible | WT    | WT    | susceptible | N87T | WT | susceptible | WT  |
| Hp_H-3   | h127 | North America | hpAfrica1 | susceptible | WT      | WT      | WT      | susceptible | WT    | WT    | resistant   | N87I | WT | susceptible | WT  |
| Hp_H-30  | h128 | North America | hpAfrica1 | susceptible | WT      | WT      | WT      | resistant   | WT    | frxA- | susceptible | N87T | WT | susceptible | WT  |
| Hp_H-34  | h129 | North America | hpAfrica1 | susceptible | WT      | WT      | WT      | resistant   | rdxA- | frxA- | susceptible | N87T | WT | susceptible | WT  |
| Hp_H-36  | h130 | North America | hpAfrica1 | susceptible | WT      | WT      | WT      | resistant   | WT    | frxA- | susceptible | N87T | WT | susceptible | WT  |
| Hp_H-4   | h131 | North America | hpAfrica1 | susceptible | WT      | WT      | WT      | susceptible | WT    | WT    | susceptible | N87T | WT | susceptible | WT  |
| Hp_H-41  | h132 | North America | hpAfrica1 | susceptible | WT      | WT      | WT      | resistant   | rdxA- | WT    | susceptible | N87T | WT | susceptible | WT  |
| Hp_H-42  | h133 | North America | hpAfrica1 | susceptible | WT      | WT      | WT      | susceptible | WT    | WT    | susceptible | N87T | WT | susceptible | WT  |
| Hp_H-43  | h134 | North America | hpEurope  | susceptible | WT      | WT      | WT      | resistant   | WT    | frxA- | susceptible | WT   | WT | susceptible | WT  |
| Hp_H-44  | h135 | North America | hpAfrica1 | unknown     | unknown | unknown | unknown | susceptible | WT    | WT    | susceptible | N87T | WT | susceptible | WT  |
| Hp_H-45  | h136 | North America | hpEurope  | susceptible | WT      | WT      | WT      | susceptible | WT    | WT    | susceptible | WT   | WT | susceptible | WT  |
| Hp_H-5b  | h137 | North America | hpAfrica1 | susceptible | WT      | WT      | WT      | susceptible | WT    | WT    | susceptible | N87T | WT | unknown     | N/A |
| Hp_H-6   | h138 | North America | hpAfrica1 | susceptible | WT      | WT      | WT      | resistant   | rdxA- | WT    | susceptible | WT   | WT | susceptible | WT  |
| Hp_H-9   | h139 | North America | hpEurope  | unknown     | unknown | unknown | unknown | susceptible | WT    | WT    | susceptible | WT   | WT | susceptible | WT  |
| Hp_M1    | h140 | North America | hpAfrica1 | unknown     | unknown | unknown | unknown | resistant   | WT    | frxA- | susceptible | N87T | WT | low level   | AGC |
| Hp_M2    | h141 | North America | hpAfrica1 | susceptible | WT      | WT      | WT      | resistant   | WT    | frxA- | susceptible | N87T | WT | low level   | AGC |
| Hp_M3    | h142 | North America | hpAfrica1 | susceptible | WT      | WT      | WT      | resistant   | WT    | frxA- | susceptible | N87T | WT | low level   | AGC |
| Hp_M4    | h143 | North America | hpAfrica1 | susceptible | WT      | WT      | WT      | resistant   | WT    | frxA- | susceptible | N87T | WT | low level   | AGC |
| Hp_M5    | h144 | North America | hpAfrica1 | susceptible | WT      | WT      | WT      | resistant   | WT    | frxA- | susceptible | N87T | WT | low level   | AGC |
| Hp_M6    | h145 | North America | hpAfrica1 | susceptible | WT      | WT      | WT      | resistant   | WT    | frxA- | susceptible | N87T | WT | low level   | AGC |
| Hp_M9    | h146 | North America | hpAfrica1 | susceptible | WT      | WT      | WT      | resistant   | WT    | frxA- | susceptible | N87T | WT | low level   | AGC |
| Hp_P-1   | h147 | North America | hpAfrica1 | susceptible | WT      | WT      | WT      | susceptible | WT    | WT    | susceptible | WT   | WT | susceptible | WT  |
| Hp_P-11  | h148 | North America | hpAfrica1 | susceptible | WT      | WT      | WT      | resistant   | WT    | frxA- | susceptible | N87T | WT | susceptible | WT  |
| Hp_P-11b | h149 | North America | hpAfrica1 | susceptible | WT      | WT      | WT      | resistant   | WT    | frxA- | susceptible | N87T | WT | susceptible | WT  |
| Hp_P-13  | h150 | North America | hpAfrica1 | susceptible | WT      | WT      | WT      | susceptible | WT    | WT    | susceptible | WT   | WT | susceptible | WT  |
| Hp_P-13b | h151 | North America | hpAfrica1 | susceptible | WT      | WT      | WT      | susceptible | WT    | WT    | susceptible | WT   | WT | susceptible | WT  |
| Hp_P-15  | h152 | North America | hpEurope  | susceptible | WT      | WT      | WT      | susceptible | WT    | WT    | susceptible | WT   | WT | susceptible | WT  |
| Hp_P-15b | h153 | North America | hpEurope  | susceptible | WT      | WT      | WT      | susceptible | WT    | WT    | susceptible | WT   | WT | susceptible | WT  |
| Hp_P-16  | h154 | North America | hpEurope  | susceptible | WT      | WT      | WT      | susceptible | WT    | WT    | susceptible | WT   | WT | susceptible | WT  |
| Hp_P-1b  | h155 | North America | hpAfrica1 | unknown     | unknown | unknown | unknown | susceptible | WT    | WT    | susceptible | WT   | WT | susceptible | WT  |
| Hp_P-2   | h156 | North America | hpAfrica1 | susceptible | WT      | WT      | WT      | susceptible | WT    | WT    | susceptible | N87T | WT | susceptible | WT  |
| Hp_P-23  | h157 | North America | hpEurope  | unknown     | unknown | unknown | unknown | susceptible | WT    | WT    | susceptible | WT   | WT | susceptible | WT  |
| Hp_P-25  | h158 | North America | hpAfrica1 | susceptible | WT      | WT      | WT      | resistant   | rdxA- | frxA- | susceptible | N87T | WT | susceptible | WT  |
| Hp_P-25c | h159 | North America | hpAfrica1 | susceptible | WT      | WT      | WT      | resistant   | rdxA- | frxA- | susceptible | N87T | WT | susceptible | WT  |
| Hp_P-25d | h160 | North America | hpAfrica1 | susceptible | WT      | WT      | WT      | resistant   | rdxA- | frxA- | susceptible | N87T | WT | susceptible | WT  |

|              |             |                   |           |             |         |         |         |             |       |       |             |      |      |             |     |
|--------------|-------------|-------------------|-----------|-------------|---------|---------|---------|-------------|-------|-------|-------------|------|------|-------------|-----|
| Hp_P-26      | h161        | North America     | hpAfrica1 | susceptible | WT      | WT      | WT      | susceptible | WT    | WT    | susceptible | N87T | WT   | susceptible | WT  |
| Hp_P-28b     | h162        | North America     | hpAfrica1 | susceptible | WT      | WT      | WT      | resistant   | rdxA- | WT    | susceptible | N87T | WT   | susceptible | WT  |
| Hp_P-2b      | h163        | North America     | hpAfrica1 | susceptible | WT      | WT      | WT      | susceptible | WT    | WT    | susceptible | N87T | WT   | susceptible | WT  |
| Hp_P-3       | h164        | North America     | hpAfrica1 | susceptible | WT      | WT      | WT      | susceptible | WT    | WT    | susceptible | N87T | WT   | susceptible | WT  |
| Hp_P-30      | h165        | North America     | hpEurope  | resistant   | WT      | A2143G  | WT      | susceptible | WT    | WT    | susceptible | WT   | WT   | susceptible | WT  |
| Hp_P-3b      | h166        | North America     | hpAfrica1 | susceptible | WT      | WT      | WT      | susceptible | WT    | WT    | susceptible | N87T | WT   | susceptible | WT  |
| Hp_P-4       | h167        | North America     | hpAfrica1 | susceptible | WT      | WT      | WT      | susceptible | WT    | WT    | susceptible | N87T | WT   | unknown     | N/A |
| Hp_P-41      | h168        | North America     | hpAfrica1 | susceptible | WT      | WT      | WT      | susceptible | WT    | WT    | susceptible | N87T | WT   | susceptible | WT  |
| Hp_P-4c      | h169        | North America     | hpAfrica1 | susceptible | WT      | WT      | WT      | resistant   | WT    | frxA- | susceptible | N87T | WT   | susceptible | WT  |
| Hp_P-4d      | h170        | North America     | hpAfrica1 | unknown     | unknown | unknown | unknown | susceptible | WT    | WT    | susceptible | N87T | WT   | susceptible | WT  |
| Hp_P-62      | h171        | North America     | hpAfrica1 | susceptible | WT      | WT      | WT      | susceptible | WT    | WT    | susceptible | WT   | WT   | susceptible | WT  |
| Hp_P-74      | h172        | North America     | hpEurope  | resistant   | WT      | A2143G  | WT      | susceptible | WT    | WT    | susceptible | WT   | WT   | susceptible | WT  |
| Hp_P-8       | h173        | North America     | hpAfrica1 | susceptible | WT      | WT      | WT      | unknown     | WT    | n/a   | susceptible | N87T | WT   | susceptible | WT  |
| Hp_P-8b      | h174        | North America     | hpAfrica1 | susceptible | WT      | WT      | WT      | unknown     | WT    | n/a   | susceptible | N87T | WT   | susceptible | WT  |
| HP116Bi      | <b>h175</b> | Africa            | hpAfrica1 | susceptible | WT      | WT      | WT      | resistant   | rdxA- | WT    | susceptible | WT   | WT   | susceptible | GGA |
| HP250AFii    | h176        | Africa            | hpAfrica1 | susceptible | WT      | WT      | WT      | resistant   | WT    | frxA- | susceptible | N87T | WT   | low level   | AGC |
| HP250AFiii   | h177        | Africa            | hpAfrica1 | susceptible | WT      | WT      | WT      | resistant   | WT    | frxA- | susceptible | N87T | WT   | low level   | AGC |
| HP250AFIV    | h178        | Africa            | hpAfrica1 | susceptible | WT      | WT      | WT      | resistant   | WT    | frxA- | susceptible | N87T | WT   | low level   | AGC |
| HP250ASi     | h179        | Africa            | hpAfrica1 | susceptible | WT      | WT      | WT      | resistant   | WT    | frxA- | susceptible | N87T | WT   | low level   | AGC |
| HP250ASii    | h180        | Africa            | hpAfrica1 | susceptible | WT      | WT      | WT      | resistant   | rdxA- | frxA- | susceptible | N87T | WT   | low level   | AGC |
| HP250BFi     | h181        | Africa            | hpAfrica1 | susceptible | WT      | WT      | WT      | resistant   | WT    | frxA- | susceptible | N87T | WT   | low level   | AGC |
| HP250BFii    | h182        | Africa            | hpAfrica1 | susceptible | WT      | WT      | WT      | resistant   | WT    | frxA- | susceptible | N87T | WT   | low level   | AGC |
| HP250BFiii   | h183        | Africa            | hpAfrica1 | susceptible | WT      | WT      | WT      | resistant   | WT    | frxA- | susceptible | N87T | WT   | low level   | AGC |
| HP250BFIV    | h184        | Africa            | hpAfrica1 | susceptible | WT      | WT      | WT      | resistant   | WT    | frxA- | susceptible | N87T | WT   | low level   | AGC |
| HP250BSi     | h185        | Africa            | hpAfrica1 | susceptible | WT      | WT      | WT      | resistant   | rdxA- | frxA- | susceptible | N87T | WT   | low level   | AGC |
| HP260AFi     | h186        | Africa            | hpAfrica1 | susceptible | WT      | WT      | WT      | resistant   | WT    | frxA- | susceptible | N87T | WT   | susceptible | WT  |
| HP260AFii    | h187        | Africa            | hpAfrica1 | susceptible | WT      | WT      | WT      | resistant   | WT    | frxA- | susceptible | N87T | WT   | susceptible | WT  |
| HP260ASii    | h188        | Africa            | hpAfrica1 | susceptible | WT      | WT      | WT      | resistant   | rdxA- | frxA- | susceptible | N87T | WT   | susceptible | WT  |
| HP260BFii    | h189        | Africa            | hpAfrica1 | susceptible | WT      | WT      | WT      | resistant   | rdxA- | WT    | susceptible | WT   | WT   | susceptible | WT  |
| HP260Bi      | h190        | Africa            | hpAfrica1 | susceptible | WT      | WT      | WT      | resistant   | WT    | frxA- | susceptible | N87T | WT   | susceptible | WT  |
| HP87hu       | h191        | Europe            | hpEurope  | low level?  | WT      | WT      | T2182C  | susceptible | WT    | WT    | susceptible | WT   | WT   | susceptible | WT  |
| HP87P7       | h192        | Europe            | hpEurope  | susceptible | WT      | WT      | WT      | susceptible | WT    | WT    | susceptible | WT   | WT   | susceptible | WT  |
| HP87P7tlpDRI | h193        | Europe            | hpEurope  | susceptible | WT      | WT      | WT      | susceptible | WT    | WT    | susceptible | WT   | WT   | susceptible | WT  |
| HP87tlpD     | h194        | Europe            | hpEurope  | susceptible | WT      | WT      | WT      | susceptible | WT    | WT    | susceptible | WT   | WT   | susceptible | WT  |
| HPAG1        | <b>h195</b> | Europe            | hpEurope  | low level?  | WT      | WT      | T2182C  | resistant   | WT    | frxA- | susceptible | WT   | WT   | susceptible | WT  |
| HPARG63      | h196        | South America     | hpEurope  | resistant   | A2142G  | WT      | WT      | resistant   | WT    | frxA- | susceptible | WT   | WT   | susceptible | WT  |
| HPARG6G      | h197        | South America     | hpEurope  | resistant   | A2142C  | WT      | WT      | resistant   | WT    | frxA- | resistant   | N87K | WT   | susceptible | WT  |
| HUP-B14      | <b>h200</b> | Europe            | hpEurope  | susceptible | WT      | WT      | WT      | susceptible | WT    | WT    | susceptible | N87T | WT   | susceptible | WT  |
| India7       | <b>h201</b> | other (India)     | hpAsia2   | low level?  | WT      | WT      | T2182C  | resistant   | rdxA- | WT    | susceptible | WT   | WT   | susceptible | WT  |
| J99          | <b>h202</b> | North America     | hpAfrica1 | susceptible | WT      | WT      | WT      | susceptible | WT    | WT    | susceptible | N87T | WT   | susceptible | WT  |
| Lithuania75  | <b>h203</b> | Europe            | hpEurope  | susceptible | WT      | WT      | WT      | susceptible | WT    | WT    | susceptible | WT   | WT   | susceptible | AGT |
| MALT         | h204        | North America     | hpEurope  | resistant   | WT      | A2143G  | WT      | resistant   | rdxA- | frxA- | resistant   | WT   | D91N | susceptible | WT  |
| N6           | h205        | Europe            | hpEurope  | low level?  | WT      | WT      | T2182C  | resistant   | rdxA- | WT    | susceptible | WT   | WT   | susceptible | WT  |
| NAB47        | <b>h206</b> | other (India)     | hpAsia2   | low level?  | NAB     | WT      | T2182C  | susceptible | WT    | WT    | susceptible | WT   | WT   | susceptible | WT  |
| NAD1         | h207        | other (India)     | hpEurope  | low level?  | WT      | WT      | T2182C  | resistant   | rdxA- | n/a   | resistant   | N87I | WT   | susceptible | WT  |
| NAK7         | h208        | other (India)     | hpAsia2   | low level?  | WT      | WT      | T2182C  | susceptible | WT    | WT    | susceptible | WT   | WT   | susceptible | WT  |
| NCTC_11637   | h209        | other (Australia) | hpEurope  | susceptible | WT      | WT      | WT      | susceptible | WT    | WT    | susceptible | WT   | WT   | susceptible | WT  |
| NQ1671       | h210        | South America     | hpEurope  | susceptible | WT      | WT      | WT      | resistant   | WT    | frxA- | susceptible | WT   | WT   | susceptible | WT  |
| NQ1701       | h211        | South America     | hpEurope  | susceptible | WT      | WT      | WT      | resistant   | WT    | frxA- | susceptible | WT   | WT   | susceptible | WT  |
| NQ1707       | h212        | South America     | hpEurope  | susceptible | WT      | WT      | WT      | resistant   | WT    | frxA- | susceptible | WT   | WT   | susceptible | WT  |
| NQ1712       | h213        | South America     | hpEurope  | susceptible | WT      | WT      | WT      | susceptible | WT    | WT    | susceptible | WT   | WT   | susceptible | WT  |
| NQ315        | h214        | South America     | hpEurope  | susceptible | WT      | WT      | WT      | resistant   | WT    | frxA- | susceptible | WT   | WT   | susceptible | WT  |
| NQ352        | h215        | South America     | hpEurope  | susceptible | WT      | WT      | WT      | resistant   | rdxA- | frxA- | susceptible | WT   | WT   | susceptible | WT  |
| NQ367        | h216        | South America     | hpEurope  | susceptible | WT      | WT      | WT      | susceptible | WT    | WT    | susceptible | WT   | WT   | susceptible | WT  |
| NQ392        | h217        | South America     | hpEurope  | susceptible | WT      | WT      | WT      | resistant   | WT    | frxA- | susceptible | WT   | WT   | susceptible | WT  |
| NQ4044       | h218        | South America     | hpEurope  | susceptible | WT      | WT      | WT      | resistant   | rdxA- | WT    | susceptible | WT   | WT   | susceptible | GGA |
| NQ4053       | h219        | South America     | hpEurope  | susceptible | WT      | WT      | WT      | susceptible | WT    | WT    | susceptible | WT   | WT   | susceptible | WT  |

|               |      |               |            |             |         |         |         |             |       |       |             |      |      |             |     |
|---------------|------|---------------|------------|-------------|---------|---------|---------|-------------|-------|-------|-------------|------|------|-------------|-----|
| NQ4060        | h220 | South America | hpEurope   | susceptible | WT      | WT      | WT      | resistant   | rdxA- | frxA- | susceptible | WT   | WT   | susceptible | WT  |
| NQ4076        | h221 | South America | hpEurope   | susceptible | WT      | WT      | WT      | susceptible | WT    | WT    | susceptible | WT   | WT   | susceptible | WT  |
| NQ4099        | h222 | South America | hpEurope   | susceptible | WT      | WT      | WT      | resistant   | WT    | frxA- | resistant   | WT   | D91N | low level   | AGC |
| NQ4110        | h223 | South America | hpEurope   | susceptible | WT      | WT      | WT      | resistant   | WT    | frxA- | susceptible | WT   | WT   | susceptible | WT  |
| NQ4161        | h224 | South America | hpEurope   | susceptible | WT      | WT      | WT      | resistant   | rdxA- | WT    | susceptible | WT   | WT   | susceptible | WT  |
| NQ4191        | h225 | South America | hpEurope   | susceptible | WT      | WT      | WT      | resistant   | WT    | frxA- | susceptible | WT   | WT   | susceptible | WT  |
| NQ4200        | h226 | South America | hpEurope   | susceptible | WT      | WT      | WT      | resistant   | WT    | frxA- | susceptible | WT   | WT   | susceptible | WT  |
| NQ4216        | h227 | South America | hpEurope   | susceptible | WT      | WT      | WT      | resistant   | WT    | frxA- | susceptible | WT   | WT   | susceptible | WT  |
| NQ4228        | h228 | South America | hpEurope   | susceptible | WT      | WT      | WT      | resistant   | WT    | frxA- | susceptible | WT   | WT   | susceptible | WT  |
| OK113         | h229 | East Asia     | hspEAsia   | low level?  | WT      | WT      | T2182C  | susceptible | WT    | WT    | susceptible | WT   | WT   | susceptible | WT  |
| OK310         | h230 | East Asia     | hspEAsia   | low level?  | WT      | WT      | T2182C  | susceptible | WT    | WT    | susceptible | WT   | WT   | susceptible | WT  |
| P12           | h231 | Europe        | hpEurope   | susceptible | WT      | WT      | WT      | susceptible | WT    | WT    | susceptible | WT   | WT   | susceptible | WT  |
| P79           | h232 | Europe        | hpEurope   | susceptible | WT      | WT      | WT      | susceptible | WT    | WT    | susceptible | WT   | WT   | susceptible | WT  |
| PeCan18       | h233 | South America | hpAfrica1  | resistant   | WT      | A2143G  | T2182C  | resistant   | rdxA- | frxA- | susceptible | WT   | WT   | susceptible | WT  |
| PeCan4        | h234 | South America | hpEurope   | susceptible | WT      | WT      | WT      | resistant   | WT    | frxA- | resistant   | WT   | D91G | susceptible | WT  |
| Puno120       | h235 | South America | hspAmerInd | low level?  | WT      | WT      | T2182C  | susceptible | WT    | WT    | resistant   | WT   | D91G | susceptible | WT  |
| Puno135       | h236 | South America | hspAmerInd | low level?  | WT      | WT      | T2182C  | susceptible | WT    | WT    | susceptible | WT   | WT   | susceptible | WT  |
| PZ5004        | h237 | South America | hpEurope   | unknown     | unknown | unknown | unknown | resistant   | n/a   | frxA- | susceptible | WT   | WT   | susceptible | WT  |
| PZ5024        | h238 | South America | hpAfrica1  | unknown     | unknown | unknown | unknown | resistant   | WT    | frxA- | susceptible | N87T | WT   | unknown     | N/A |
| PZ5026        | h239 | South America | hpEurope   | susceptible | WT      | WT      | WT      | resistant   | rdxA- | frxA- | susceptible | N87T | WT   | susceptible | WT  |
| PZ5056        | h240 | South America | hpEurope   | susceptible | WT      | WT      | WT      | resistant   | rdxA- | frxA- | susceptible | WT   | WT   | unknown     | N/A |
| PZ5080        | h241 | South America | hpEurope   | unknown     | unknown | unknown | unknown | resistant   | WT    | frxA- | susceptible | WT   | WT   | susceptible | WT  |
| PZ5086        | h242 | South America | hpAfrica1  | susceptible | WT      | WT      | WT      | susceptible | WT    | WT    | susceptible | WT   | WT   | unknown     | N/A |
| R018c         | h243 | North America | hpEurope   | low level?  | WT      | WT      | T2182C  | susceptible | WT    | WT    | susceptible | WT   | WT   | unknown     | N/A |
| R030b         | h244 | North America | hpAfrica1  | susceptible | WT      | WT      | WT      | susceptible | WT    | WT    | susceptible | N87T | WT   | susceptible | WT  |
| R036d         | h245 | North America | hpEurope   | low level?  | WT      | WT      | T2182C  | susceptible | WT    | WT    | susceptible | WT   | WT   | susceptible | WT  |
| R037c         | h246 | North America | hpEurope   | susceptible | WT      | WT      | WT      | resistant   | rdxA- | WT    | susceptible | WT   | WT   | susceptible | WT  |
| R038b         | h247 | North America | hpEurope   | susceptible | WT      | WT      | WT      | susceptible | WT    | WT    | susceptible | WT   | WT   | unknown     | N/A |
| R046Wa        | h248 | North America | hpEurope   | susceptible | WT      | WT      | WT      | susceptible | WT    | WT    | susceptible | WT   | WT   | susceptible | WT  |
| R055a         | h249 | North America | hpEurope   | low level?  | WT      | WT      | T2182C  | resistant   | WT    | frxA- | susceptible | WT   | WT   | unknown     | N/A |
| R056a         | h250 | North America | hpEurope   | low level?  | WT      | WT      | T2182C  | susceptible | WT    | WT    | susceptible | WT   | WT   | susceptible | WT  |
| R32b          | h251 | North America | hpEurope   | susceptible | WT      | WT      | WT      | susceptible | WT    | WT    | susceptible | WT   | WT   | unknown     | N/A |
| Rif1          | h252 | Europe        | hpEurope   | susceptible | WT      | WT      | WT      | susceptible | WT    | WT    | susceptible | WT   | WT   | susceptible | WT  |
| Rif2          | h253 | Europe        | hpEurope   | susceptible | WT      | WT      | WT      | susceptible | WT    | WT    | susceptible | WT   | WT   | susceptible | WT  |
| Sat464        | h254 | South America | hspAmerInd | low level?  | WT      | WT      | T2182C  | susceptible | WT    | WT    | susceptible | WT   | WT   | susceptible | WT  |
| Shi112        | h255 | South America | hspAmerInd | low level?  | WT      | WT      | T2182C  | susceptible | WT    | WT    | susceptible | WT   | WT   | susceptible | WT  |
| Shi169        | h256 | South America | hspAmerInd | low level?  | WT      | WT      | T2182C  | susceptible | WT    | WT    | susceptible | WT   | WT   | susceptible | WT  |
| Shi417        | h257 | South America | hspAmerInd | low level?  | WT      | WT      | T2182C  | susceptible | WT    | WT    | susceptible | WT   | WT   | susceptible | WT  |
| Shi470        | h258 | South America | hspAmerInd | low level?  | WT      | WT      | T2182C  | resistant   | rdxA- | frxA- | susceptible | WT   | WT   | susceptible | WT  |
| SJM180        | h259 | South America | hpEurope   | susceptible | WT      | WT      | WT      | susceptible | WT    | WT    | susceptible | WT   | WT   | susceptible | WT  |
| SNT49         | h260 | other (India) | hpAsia2    | low level?  | WT      | WT      | T2182C  | resistant   | WT    | frxA- | resistant   | WT   | D91N | susceptible | WT  |
| SouthAfrica20 | h261 | Africa        | hpAfrica2  | susceptible | WT      | WT      | WT      | resistant   | rdxA- | WT    | susceptible | N87S | WT   | susceptible | WT  |
| SouthAfrica50 | h262 | Africa        | hpAfrica2  | resistant   | WT      | A2143G  | WT      | resistant   | rdxA- | frxA- | susceptible | N87R | WT   | susceptible | WT  |
| SouthAfrica7  | h263 | Africa        | hpAfrica2  | susceptible | WT      | WT      | WT      | susceptible | WT    | WT    | susceptible | N87S | WT   | susceptible | WT  |
| UM007         | h264 | East Asia     | hspEAsia   | low level?  | WT      | WT      | T2182C  | resistant   | rdxA- | WT    | susceptible | WT   | WT   | susceptible | WT  |
| UM018         | h265 | East Asia     | hpAsia2    | low level?  | WT      | WT      | T2182C  | resistant   | WT    | frxA- | susceptible | WT   | WT   | susceptible | WT  |
| UM023         | h266 | East Asia     | hspEAsia   | low level?  | WT      | WT      | T2182C  | resistant   | rdxA- | WT    | susceptible | WT   | WT   | susceptible | WT  |
| UM032         | h267 | East Asia     | hspEAsia   | low level?  | WT      | WT      | T2182C  | susceptible | WT    | WT    | susceptible | WT   | WT   | susceptible | WT  |
| UM034         | h268 | East Asia     | hspEAsia   | low level?  | WT      | WT      | T2182C  | resistant   | rdxA- | frxA- | susceptible | WT   | WT   | susceptible | WT  |
| UM037         | h269 | East Asia     | hpEurope   | resistant   | A2142G  | WT      | WT      | resistant   | WT    | frxA- | susceptible | WT   | WT   | susceptible | WT  |
| UM038         | h270 | East Asia     | hspEAsia   | resistant   | WT      | A2143G  | T2182C  | susceptible | WT    | WT    | resistant   | WT   | D91Y | susceptible | WT  |
| UM045         | h271 | East Asia     | hpEurope   | susceptible | WT      | WT      | WT      | resistant   | rdxA- | frxA- | susceptible | WT   | WT   | susceptible | WT  |
| UM054         | h272 | East Asia     | hpAsia2    | low level?  | WT      | WT      | T2182C  | susceptible | WT    | WT    | susceptible | WT   | WT   | susceptible | WT  |
| UM065         | h273 | East Asia     | hspEAsia   | low level?  | WT      | WT      | T2182C  | susceptible | WT    | WT    | susceptible | WT   | WT   | susceptible | WT  |
| UM066         | h274 | East Asia     | hspEAsia   | low level?  | WT      | WT      | T2182C  | susceptible | WT    | WT    | susceptible | WT   | WT   | susceptible | WT  |
| UM067         | h275 | East Asia     | hpAsia2    | susceptible | WT      | WT      | WT      | resistant   | rdxA- | frxA- | susceptible | WT   | WT   | susceptible | WT  |
| UM077         | h276 | East Asia     | hspEAsia   | low level?  | WT      | WT      | T2182C  | susceptible | WT    | WT    | resistant   | N87K | WT   | susceptible | WT  |

|          |             |               |            |             |    |        |        |             |       |       |             |      |      |             |     |
|----------|-------------|---------------|------------|-------------|----|--------|--------|-------------|-------|-------|-------------|------|------|-------------|-----|
| UM084    | h277        | East Asia     | hpAsia2    | low level?  | WT | WT     | T2182C | resistant   | WT    | frxA- | susceptible | WT   | WT   | susceptible | WT  |
| UM085    | h278        | East Asia     | hspEAsia   | resistant   | WT | A2143G | T2182C | susceptible | WT    | WT    | resistant   | N87K | WT   | susceptible | WT  |
| UM111    | h279        | East Asia     | hspEAsia   | resistant   | WT | A2143G | WT     | resistant   | WT    | frxA- | susceptible | WT   | WT   | susceptible | WT  |
| UM114    | h280        | East Asia     | hpAsia2    | low level?  | WT | WT     | T2182C | resistant   | rdxA- | frxA- | resistant   | N87K | WT   | susceptible | WT  |
| UM298    | <b>h281</b> | East Asia     | hspEAsia   | low level?  | WT | WT     | T2182C | susceptible | WT    | WT    | susceptible | WT   | WT   | susceptible | WT  |
| UM299    | <b>h282</b> | East Asia     | hspEAsia   | low level?  | WT | WT     | T2182C | susceptible | WT    | WT    | susceptible | WT   | WT   | susceptible | WT  |
| UMB_G1   | h283        | North America | hpEurope   | resistant   | WT | A2143G | WT     | resistant   | rdxA- | frxA- | resistant   | WT   | D91N | susceptible | WT  |
| v225     | <b>h284</b> | South America | hspAmerInd | low level?  | WT | WT     | T2182C | susceptible | WT    | WT    | susceptible | WT   | WT   | susceptible | WT  |
| wls-5-12 | h285        | East Asia     | hspEAsia   | low level?  | WT | WT     | T2182C | resistant   | rdxA- | WT    | susceptible | WT   | WT   | susceptible | WT  |
| wls-5-3  | h286        | East Asia     | hspEAsia   | low level?  | WT | WT     | T2182C | susceptible | WT    | WT    | susceptible | WT   | WT   | susceptible | WT  |
| X47-2AL  | h287        | North America | hpEurope   | susceptible | WT | WT     | WT     | susceptible | WT    | WT    | susceptible | WT   | WT   | susceptible | WT  |
| XZ274    | <b>h288</b> | East Asia     | hspEAsia   | low level?  | WT | WT     | T2182C | resistant   | rdxA- | frxA- | susceptible | WT   | WT   | susceptible | WT  |
| SA144A   | h289        | Africa        | hpAfrica2  | susceptible | WT | WT     | WT     | resistant   | WT    | frxA- | susceptible | N87S | WT   | susceptible | WT  |
| SA144C   | h290        | Africa        | hpAfrica2  | susceptible | WT | WT     | WT     | unknown     | n/a   | WT    | susceptible | N87S | WT   | low level   | TGA |
| SA146A   | h291        | Africa        | hpAfrica1  | susceptible | WT | WT     | WT     | susceptible | WT    | WT    | susceptible | WT   | WT   | susceptible | GGA |
| SA146C   | h292        | Africa        | hpAfrica1  | susceptible | WT | WT     | WT     | susceptible | WT    | WT    | susceptible | WT   | WT   | susceptible | GGA |
| SA155A   | h293        | Africa        | hpAfrica2  | susceptible | WT | WT     | WT     | resistant   | rdxA- | frxA- | susceptible | N87S | WT   | susceptible | WT  |
| SA155C   | h294        | Africa        | hpAfrica2  | susceptible | WT | WT     | WT     | resistant   | rdxA- | WT    | susceptible | N87S | WT   | susceptible | WT  |
| SA156A   | h295        | Africa        | hpAfrica1  | susceptible | WT | WT     | WT     | susceptible | WT    | WT    | susceptible | WT   | WT   | susceptible | WT  |
| SA157A   | h296        | Africa        | hpAfrica1  | susceptible | WT | WT     | WT     | susceptible | WT    | WT    | susceptible | WT   | WT   | susceptible | WT  |
| SA157C   | h297        | Africa        | hpAfrica1  | susceptible | WT | WT     | WT     | susceptible | WT    | WT    | susceptible | WT   | WT   | susceptible | WT  |
| SA158A   | <b>h298</b> | Africa        | hpAfrica1  | susceptible | WT | WT     | WT     | resistant   | WT    | frxA- | susceptible | WT   | WT   | susceptible | WT  |
| SA158C   | h299        | Africa        | hpAfrica1  | susceptible | WT | WT     | WT     | susceptible | WT    | WT    | susceptible | WT   | WT   | susceptible | WT  |
| SA160A   | h300        | Africa        | hpAfrica2  | susceptible | WT | WT     | WT     | susceptible | WT    | WT    | susceptible | N87S | WT   | susceptible | WT  |
| SA160C   | h301        | Africa        | hpAfrica2  | susceptible | WT | WT     | WT     | susceptible | WT    | WT    | susceptible | N87S | WT   | susceptible | WT  |
| SA161A   | h302        | Africa        | hpAfrica1  | susceptible | WT | WT     | WT     | susceptible | WT    | WT    | susceptible | N87T | WT   | susceptible | WT  |
| SA161C   | h303        | Africa        | hpAfrica1  | susceptible | WT | WT     | WT     | susceptible | WT    | WT    | susceptible | N87T | WT   | susceptible | WT  |
| SA162A   | h304        | Africa        | hpAfrica1  | susceptible | WT | WT     | WT     | susceptible | WT    | WT    | susceptible | N87T | WT   | susceptible | WT  |
| SA162C   | h305        | Africa        | hpAfrica1  | susceptible | WT | WT     | WT     | susceptible | WT    | WT    | susceptible | N87T | WT   | susceptible | WT  |
| SA163A   | h306        | Africa        | hpAfrica1  | susceptible | WT | WT     | WT     | susceptible | WT    | WT    | susceptible | WT   | WT   | susceptible | WT  |
| SA163C   | h307        | Africa        | hpAfrica1  | susceptible | WT | WT     | WT     | susceptible | WT    | WT    | susceptible | WT   | WT   | susceptible | WT  |
| SA164A   | h308        | Africa        | hpEurope   | susceptible | WT | WT     | WT     | resistant   | WT    | frxA- | susceptible | WT   | WT   | susceptible | WT  |
| SA164C   | h309        | Africa        | hpEurope   | susceptible | WT | WT     | WT     | resistant   | WT    | frxA- | susceptible | WT   | WT   | susceptible | WT  |
| SA165A   | h310        | Africa        | hpEurope   | susceptible | WT | WT     | WT     | resistant   | WT    | frxA- | susceptible | WT   | WT   | susceptible | WT  |
| SA165C   | h311        | Africa        | hpEurope   | susceptible | WT | WT     | WT     | resistant   | WT    | frxA- | susceptible | WT   | WT   | susceptible | WT  |
| SA166A   | h312        | Africa        | hpAfrica2  | susceptible | WT | WT     | WT     | resistant   | WT    | frxA- | susceptible | N87S | WT   | susceptible | WT  |
| SA168A   | h313        | Africa        | hpAfrica1  | susceptible | WT | WT     | WT     | resistant   | rdxA- | frxA- | susceptible | N87S | WT   | low level   | TGA |
| SA168C   | h314        | Africa        | hpAfrica1  | susceptible | WT | WT     | WT     | susceptible | WT    | WT    | susceptible | N87S | WT   | low level   | TGA |
| SA169C   | h315        | Africa        | hpAfrica2  | resistant   | WT | A2143G | WT     | resistant   | rdxA- | WT    | susceptible | N87S | WT   | susceptible | GGA |
| SA170A   | h316        | Africa        | hpAfrica1  | susceptible | WT | WT     | WT     | susceptible | WT    | WT    | susceptible | WT   | WT   | susceptible | WT  |
| SA170C   | h317        | Africa        | hpAfrica1  | susceptible | WT | WT     | WT     | susceptible | WT    | WT    | susceptible | WT   | WT   | susceptible | WT  |
| SA171A   | h318        | Africa        | hpEurope   | susceptible | WT | WT     | WT     | susceptible | WT    | WT    | susceptible | WT   | WT   | susceptible | WT  |
| SA171C   | h319        | Africa        | hpEurope   | susceptible | WT | WT     | WT     | susceptible | WT    | WT    | susceptible | WT   | WT   | susceptible | WT  |
| SA172A   | h320        | Africa        | hpEurope   | susceptible | WT | WT     | WT     | susceptible | WT    | WT    | susceptible | WT   | WT   | susceptible | WT  |
| SA172C   | h321        | Africa        | hpAfrica2  | susceptible | WT | WT     | WT     | resistant   | WT    | frxA- | susceptible | N87S | WT   | susceptible | WT  |
| SA173A   | h322        | Africa        | hpEurope   | susceptible | WT | WT     | WT     | susceptible | WT    | WT    | susceptible | WT   | WT   | susceptible | WT  |
| SA173C   | h323        | Africa        | hpEurope   | susceptible | WT | WT     | WT     | susceptible | WT    | WT    | susceptible | WT   | WT   | susceptible | WT  |
| SA174A   | h324        | Africa        | hpAfrica2  | susceptible | WT | WT     | WT     | susceptible | WT    | WT    | susceptible | N87S | WT   | susceptible | WT  |
| SA175A   | h325        | Africa        | hpAfrica2  | susceptible | WT | WT     | WT     | susceptible | WT    | WT    | susceptible | N87T | WT   | susceptible | WT  |
| SA175C   | h326        | Africa        | hpAfrica2  | susceptible | WT | WT     | WT     | susceptible | WT    | WT    | susceptible | N87T | WT   | susceptible | WT  |
| SA194A   | h327        | Africa        | hpAfrica2  | susceptible | WT | WT     | WT     | susceptible | WT    | WT    | susceptible | N87S | WT   | susceptible | WT  |
| SA194C   | h328        | Africa        | hpAfrica2  | susceptible | WT | WT     | WT     | unknown     | n/a   | n/a   | susceptible | N87S | WT   | susceptible | WT  |
| SA210A   | <b>h329</b> | Africa        | hpAfrica1  | susceptible | WT | WT     | WT     | susceptible | WT    | WT    | susceptible | WT   | WT   | susceptible | WT  |
| SA210C   | h330        | Africa        | hpAfrica1  | susceptible | WT | WT     | WT     | susceptible | WT    | WT    | susceptible | WT   | WT   | susceptible | WT  |
| SA213A   | h331        | Africa        | hpEurope   | susceptible | WT | WT     | WT     | resistant   | rdxA- | frxA- | susceptible | WT   | WT   | susceptible | WT  |
| SA214A   | <b>h332</b> | Africa        | hpAfrica1  | susceptible | WT | WT     | WT     | susceptible | WT    | WT    | susceptible | WT   | WT   | susceptible | WT  |
| SA214C   | h333        | Africa        | hpAfrica1  | susceptible | WT | WT     | WT     | susceptible | WT    | WT    | susceptible | WT   | WT   | susceptible | WT  |

|         |      |                   |           |             |    |        |        |             |       |       |             |      |    |             |     |
|---------|------|-------------------|-----------|-------------|----|--------|--------|-------------|-------|-------|-------------|------|----|-------------|-----|
| SA215C  | h334 | Africa            | hpAfrica1 | susceptible | WT | WT     | WT     | susceptible | WT    | WT    | susceptible | WT   | WT | susceptible | WT  |
| SA216C  | h335 | Africa            | hpAfrica1 | susceptible | WT | WT     | WT     | susceptible | WT    | WT    | susceptible | WT   | WT | susceptible | WT  |
| SA220A  | h336 | Africa            | hpAfrica1 | susceptible | WT | WT     | WT     | resistant   | WT    | frxA- | susceptible | WT   | WT | susceptible | WT  |
| SA220C  | h337 | Africa            | hpAfrica1 | susceptible | WT | WT     | WT     | resistant   | WT    | frxA- | susceptible | WT   | WT | susceptible | WT  |
| SA221A  | h338 | Africa            | hpEurope  | susceptible | WT | WT     | WT     | unknown     | n/a   | WT    | susceptible | WT   | WT | susceptible | WT  |
| SA221C  | h339 | Africa            | hpEurope  | susceptible | WT | WT     | WT     | unknown     | n/a   | n/a   | susceptible | WT   | WT | susceptible | WT  |
| SA222A  | h340 | Africa            | hpAsia2   | low level?  | WT | WT     | T2182C | resistant   | rdxA- | frxA- | susceptible | WT   | WT | susceptible | WT  |
| SA222C  | h341 | Africa            | hpAsia2   | low level?  | WT | WT     | T2182C | resistant   | rdxA- | WT    | susceptible | WT   | WT | susceptible | WT  |
| SA224A  | h342 | Africa            | hpAfrica1 | susceptible | WT | WT     | WT     | resistant   | rdxA- | frxA- | susceptible | N87S | WT | susceptible | WT  |
| SA224C  | h343 | Africa            | hpAfrica1 | susceptible | WT | WT     | WT     | resistant   | rdxA- | frxA- | susceptible | N87S | WT | susceptible | GGA |
| SA226A  | h344 | Africa            | hpAfrica1 | susceptible | WT | WT     | WT     | susceptible | WT    | WT    | susceptible | WT   | WT | susceptible | WT  |
| SA227A  | h345 | Africa            | hpAfrica1 | susceptible | WT | WT     | WT     | resistant   | rdxA- | WT    | susceptible | WT   | WT | susceptible | WT  |
| SA233A  | h346 | Africa            | hpAfrica2 | susceptible | WT | WT     | WT     | susceptible | rdxA- | WT    | susceptible | N87S | WT | susceptible | WT  |
| SA233C  | h347 | Africa            | hpAfrica2 | susceptible | WT | WT     | WT     | susceptible | WT    | WT    | susceptible | N87S | WT | susceptible | WT  |
| SA251A  | h348 | Africa            | hpAfrica2 | susceptible | WT | WT     | WT     | unknown     | n/a   | n/a   | susceptible | N87S | WT | susceptible | WT  |
| SA251C  | h349 | Africa            | hpAfrica2 | susceptible | WT | WT     | WT     | susceptible | WT    | WT    | susceptible | N87S | WT | susceptible | WT  |
| SA252A  | h350 | Africa            | hpAfrica1 | susceptible | WT | WT     | WT     | susceptible | WT    | WT    | susceptible | N87T | WT | low level   | TGA |
| SA252C  | h351 | Africa            | hpAfrica1 | susceptible | WT | WT     | WT     | resistant   | WT    | frxA- | susceptible | N87S | WT | low level   | TGA |
| SA253A  | h352 | Africa            | hpAfrica2 | susceptible | WT | WT     | WT     | unknown     | n/a   | n/a   | susceptible | N87S | WT | susceptible | WT  |
| SA253C  | h353 | Africa            | hpAfrica2 | susceptible | WT | WT     | WT     | resistant   | rdxA- | WT    | susceptible | N87S | WT | susceptible | WT  |
| SA29A   | h354 | Africa            | hpAfrica2 | susceptible | WT | WT     | WT     | unknown     | n/a   | WT    | susceptible | N87S | WT | susceptible | WT  |
| SA29C   | h355 | Africa            | hpAfrica1 | susceptible | WT | WT     | WT     | susceptible | WT    | WT    | susceptible | N87S | WT | susceptible | GGA |
| SA300A  | h356 | Africa            | hpAfrica1 | susceptible | WT | WT     | WT     | susceptible | WT    | WT    | susceptible | WT   | WT | susceptible | WT  |
| SA300C  | h357 | Africa            | hpAfrica1 | susceptible | WT | WT     | WT     | susceptible | WT    | WT    | susceptible | WT   | WT | susceptible | WT  |
| SA301A  | h358 | Africa            | hpAfrica1 | susceptible | WT | WT     | WT     | resistant   | WT    | frxA- | susceptible | N87T | WT | susceptible | WT  |
| SA301C  | h359 | Africa            | hpAfrica1 | susceptible | WT | WT     | WT     | resistant   | rdxA- | frxA- | susceptible | N87T | WT | susceptible | WT  |
| SA302A  | h360 | Africa            | hpEurope  | resistant   | WT | A2143G | WT     | resistant   | rdxA- | frxA- | susceptible | WT   | WT | susceptible | WT  |
| SA302C  | h361 | Africa            | hpEurope  | resistant   | WT | A2143G | WT     | resistant   | rdxA- | frxA- | susceptible | WT   | WT | susceptible | WT  |
| SA303C  | h362 | Africa            | hpAfrica2 | susceptible | WT | WT     | WT     | susceptible | WT    | WT    | susceptible | N87S | WT | susceptible | GGA |
| SA30A   | h363 | Africa            | hpAfrica1 | susceptible | WT | WT     | WT     | susceptible | WT    | WT    | susceptible | WT   | WT | susceptible | WT  |
| SA30C   | h364 | Africa            | hpAfrica1 | susceptible | WT | WT     | WT     | susceptible | WT    | WT    | susceptible | WT   | WT | susceptible | WT  |
| SA31C   | h365 | Africa            | hpAfrica1 | susceptible | WT | WT     | WT     | resistant   | rdxA- | WT    | susceptible | WT   | WT | susceptible | WT  |
| SA34A   | h366 | Africa            | hpAfrica2 | susceptible | WT | WT     | WT     | resistant   | rdxA- | WT    | susceptible | N87S | WT | susceptible | WT  |
| SA34C   | h367 | Africa            | hpAfrica2 | susceptible | WT | WT     | WT     | susceptible | WT    | WT    | susceptible | N87S | WT | susceptible | WT  |
| SA35A   | h368 | Africa            | hpAfrica1 | susceptible | WT | WT     | WT     | resistant   | rdxA- | WT    | susceptible | WT   | WT | susceptible | WT  |
| SA36C   | h369 | Africa            | hpAfrica2 | susceptible | WT | WT     | WT     | resistant   | rdxA- | WT    | susceptible | N87S | WT | susceptible | WT  |
| SA37A   | h370 | Africa            | hpEurope  | susceptible | WT | WT     | WT     | susceptible | WT    | WT    | susceptible | WT   | WT | susceptible | WT  |
| SA37C   | h371 | Africa            | hpEurope  | susceptible | WT | WT     | WT     | susceptible | WT    | WT    | susceptible | WT   | WT | susceptible | WT  |
| SA40A   | h372 | Africa            | hpAfrica2 | susceptible | WT | WT     | WT     | resistant   | WT    | frxA- | susceptible | N87S | WT | susceptible | WT  |
| SA40C   | h373 | Africa            | hpAfrica2 | susceptible | WT | WT     | WT     | resistant   | WT    | frxA- | susceptible | N87S | WT | susceptible | WT  |
| SA45A   | h374 | Africa            | hpAfrica1 | susceptible | WT | WT     | WT     | susceptible | WT    | WT    | susceptible | WT   | WT | susceptible | WT  |
| SA45C   | h375 | Africa            | hpAfrica1 | susceptible | WT | WT     | WT     | susceptible | WT    | WT    | susceptible | N87T | WT | susceptible | WT  |
| SA46C   | h376 | Africa            | hpAfrica1 | susceptible | WT | WT     | WT     | resistant   | rdxA- | WT    | susceptible | WT   | WT | susceptible | WT  |
| SA47A   | h377 | Africa            | hpAfrica2 | susceptible | WT | WT     | WT     | susceptible | WT    | WT    | susceptible | N87S | WT | susceptible | WT  |
| SA47C   | h378 | Africa            | hpAfrica2 | susceptible | WT | WT     | WT     | susceptible | WT    | WT    | susceptible | N87S | WT | susceptible | WT  |
| Sahul64 | h379 | other (Australia) | hpSahul   | susceptible | WT | WT     | WT     | resistant   | rdxA- | WT    | susceptible | WT   | WT | susceptible | WT  |

## References

1. **Sims GE, Jun SR, Wu GA, Kim SH.** 2009. Alignment-free genome comparison with feature frequency profiles (FFP) and optimal resolutions. *Proc Natl Acad Sci U S A* **106**:2677-2682.
2. **Zerbino DR, Birney E.** 2008. Velvet: algorithms for de novo short read assembly using de Bruijn graphs. *Genome Res* **18**:821-829.
3. **Didelot X, Nell S, Yang I, Woltemate S, van der Merwe S, Suerbaum S.** 2013. Genomic evolution and transmission of *Helicobacter pylori* in two South African families. *Proc Natl Acad Sci U S A* **110**:13880-13885.
4. **Tamura K, Peterson D, Peterson N, Stecher G, Nei M, Kumar S.** 2011. MEGA5: molecular evolutionary genetics analysis using maximum likelihood, evolutionary distance, and maximum parsimony methods. *Mol Biol Evol* **28**:2731-2739.
5. **Falush D, Kraft C, Taylor NS, Correa P, Fox JG, Achtman M, Suerbaum S.** 2001. Recombination and mutation during long-term gastric colonization by *Helicobacter pylori*: estimates of clock rates, recombination size, and minimal age. *Proc Natl Acad Sci U S A* **98**:15056-15061.
6. **Moodley Y, Linz B, Bond RP, Nieuwoudt M, Soodyall H, Schlebusch CM, Bernhoft S, Hale J, Suerbaum S, Mugisha L, van der Merwe SW, Achtman M.** 2012. Age of the association between *Helicobacter pylori* and man. *PLoS Pathog* **8**:e1002693.
7. **Abadi AT, Taghvaei T, Wolfram L, Kusters JG.** 2012. Infection with *Helicobacter pylori* strains lacking *dupA* is associated with an increased risk of gastric ulcer and gastric cancer development. *J Med Microbiol* **61**:23-30.
8. **Maeda S, Yoshida H, Ikenoue T, Ogura K, Kanai F, Kato N, Shiratori Y, Omata M.** 1999. Structure of *cag* pathogenicity island in Japanese *Helicobacter pylori* isolates. *Gut* **44**:336-341.
9. **Tummuru MK, Cover TL, Blaser MJ.** 1993. Cloning and expression of a high-molecular-mass major antigen of *Helicobacter pylori*: evidence of linkage to cytotoxin production. *Infect Immun* **61**:1799-1809.
10. **Armitano RI, Matteo MJ, Goldman C, Wonaga A, Viola LA, De Palma GZ, Catalano M.** 2013. *Helicobacter pylori* heterogeneity in patients with gastritis and peptic ulcer disease. *Infect Genet Evol* **16**:377-385.



11. **Atherton JC, Cao P, Peek RM, Jr., Tummuru MK, Blaser MJ, Cover TL.** 1995. Mosaicism in vacuolating cytotoxin alleles of *Helicobacter pylori*. Association of specific *vacA* types with cytotoxin production and peptic ulceration. *J Biol Chem* **270**:17771-17777.
12. **Atherton JC, Cover TL, Twells RJ, Morales MR, Hawkey CJ, Blaser MJ.** 1999. Simple and accurate PCR-based system for typing vacuolating cytotoxin alleles of *Helicobacter pylori*. *J Clin Microbiol* **37**:2979-2982.
13. **Rhead JL, Letley DP, Mohammadi M, Hussein N, Mohagheghi MA, Eshagh Hosseini M, Atherton JC.** 2007. A new *Helicobacter pylori* vacuolating cytotoxin determinant, the intermediate region, is associated with gastric cancer. *Gastroenterology* **133**:926-936.
14. **Ogiwara H, Sugimoto M, Ohno T, Vilaichone RK, Mahachai V, Graham DY, Yamaoka Y.** 2009. Role of deletion located between the intermediate and middle regions of the *Helicobacter pylori vacA* gene in cases of gastroduodenal diseases. *J Clin Microbiol* **47**:3493-3500.
15. **Mizushima T, Sugiyama T, Komatsu Y, Ishizuka J, Kato M, Asaka M.** 2001. Clinical relevance of the *babA2* genotype of *Helicobacter pylori* in Japanese clinical isolates. *J Clin Microbiol* **39**:2463-2465.
16. **Takahashi A, Shiota S, Matsunari O, Watada M, Suzuki R, Nakachi S, Kinjo N, Kinjo F, Yamaoka Y.** 2013. Intact long-type *dupA* as a marker for gastroduodenal diseases in Okinawan subpopulation, Japan. *Helicobacter* **18**:66-72.
17. **van Doorn LJ, Figueiredo C, Sanna R, Plaisier A, Schneeberger P, de Boer W, Quint W.** 1998. Clinical relevance of the *cagA*, *vacA*, and *iceA* status of *Helicobacter pylori*. *Gastroenterology* **115**:58-66.
